# Supplementary material for: Synthesis of glycosyl chlorides using catalytic Appel conditions
Source: Royal Society of Chemistry journal article supplement (doi:10.1039/c9ob01544b), 2019-01-01

# Synthesis of Glycosyl Chlorides Using Catalytic Appel Conditions

Imlirenla Pongener, Kirill Nikitin, Eoghan M. McGarrigle\*

Centre for Synthesis and Chemical Biology, UCD School of Chemistry,  
University College Dublin, Belfield, Dublin 4, Ireland.

[eoghan.mcgarrigle@ucd.ie](mailto:eoghan.mcgarrigle@ucd.ie)

## Supporting Information

### Contents

|                                                                                                                                                                                                                           |    |
|---------------------------------------------------------------------------------------------------------------------------------------------------------------------------------------------------------------------------|----|
| General Experimental .....                                                                                                                                                                                                | 3  |
| Synthesis of Hemiacetals 1 and Acceptor 6 .....                                                                                                                                                                           | 4  |
| 6- <i>O</i> -Acetyl-3,4-di- <i>O</i> -benzyl-2-deoxy- $\alpha/\beta$ -D-glucopyranose 1g .....                                                                                                                            | 4  |
| 2,3-Di- <i>O</i> -benzyl-4- <i>O</i> - <i>tert</i> -butyldimethylsilyl- $\alpha/\beta$ -D-galactopyranose S1 .....                                                                                                        | 5  |
| 1,6-Di- <i>O</i> -acetyl-2,3-di- <i>O</i> -benzyl-4- <i>O</i> - <i>tert</i> -butyldimethylsilyl- $\alpha/\beta$ -D-galactopyranose S2 ....                                                                                | 6  |
| 6- <i>O</i> -Acetyl-2,3-di- <i>O</i> -benzyl-4- <i>O</i> - <i>tert</i> -butyldimethylsilyl- $\alpha/\beta$ -D-galactopyranose 1h .....                                                                                    | 7  |
| Methyl 4-acetyl-2,3,6-tri- <i>O</i> - <i>tert</i> -butyldimethylsilyl- $\alpha$ -D-glucopyranoside S5 and Methyl 3-<br>acetyl-2,4,6-tri- <i>O</i> - <i>tert</i> -butyldimethylsilyl- $\alpha$ -D-glucopyranoside S6 ..... | 8  |
| 4,6-Diacetyl-2,3,-di- <i>O</i> - <i>tert</i> -butyldimethylsilyl- $\alpha$ -D-glucopyranoside 1q .....                                                                                                                    | 9  |
| 3,6-Diacetyl-2,4-di- <i>O</i> - <i>tert</i> -butyldimethylsilyl- $\alpha$ -D-glucopyranoside 1r .....                                                                                                                     | 11 |
| 3,4,6-Tri- <i>O</i> - <i>tert</i> -butyldimethylsilyl-2-deoxy- $\alpha/\beta$ -D-galactopyranose 1s .....                                                                                                                 | 13 |
| General Procedure A for synthesis of Glycosyl Chlorides .....                                                                                                                                                             | 15 |
| Procedure for Slow Addition of hemiacetal and Oxalyl Chloride .....                                                                                                                                                       | 15 |
| Procedure for Uncatalysed Reactions .....                                                                                                                                                                                 | 15 |
| General Procedure B for synthesis of Glycosyl Chlorides .....                                                                                                                                                             | 15 |
| General Procedure C for synthesis of Glycosyl Chlorides .....                                                                                                                                                             | 16 |
| 2,3,4,6-Tetra- <i>O</i> -benzyl- $\alpha$ -D-glucopyranosyl chloride 2a .....                                                                                                                                             | 17 |
| 2,3,4,6-Tetra- <i>O</i> -benzyl- $\alpha$ -D-galactopyranosyl chloride 2b .....                                                                                                                                           | 17 |
| 2,3,4,6-Tetra- <i>O</i> -benzyl- $\alpha$ -D-mannopyranosyl chloride 2c .....                                                                                                                                             | 18 |
| 3,4,6-Tri- <i>O</i> -benzyl-2-deoxy- $\alpha$ -D-glucopyranosyl chloride 2d .....                                                                                                                                         | 19 |
| 3,4,6-Tri- <i>O</i> -benzyl-2-deoxy- $\alpha$ -D-galactopyranosyl chloride 2e .....                                                                                                                                       | 19 |
| 3,4,6-Tri- <i>O</i> -acetyl-2-deoxy- $\alpha$ -D-glucopyranosyl chloride 2f .....                                                                                                                                         | 20 |
| 6- <i>O</i> -Acetyl,3,4-di- <i>O</i> -benzyl-2-deoxy- $\alpha$ -D-glucopyranosyl chloride 2g .....                                                                                                                        | 20 |
| 6- <i>O</i> -Acetyl,2,3-di- <i>O</i> -benzyl-4- <i>O</i> - <i>tert</i> -butyldimethylsilyl- $\alpha/\beta$ -D-galactopyranosyl chloride<br>2h .....                                                                       | 21 |

|                                                                                                                                |    |
|--------------------------------------------------------------------------------------------------------------------------------|----|
| 2,3,4,6-Tetra- <i>O</i> -benzoyl- $\alpha/\beta$ -D-glucopyranosyl chloride 2i .....                                           | 21 |
| 2,3-Di- <i>O</i> -benzyl-4,6- <i>O</i> -benzylidene- $\alpha/\beta$ -D-galactopyranosyl chloride 2j .....                      | 22 |
| 2,3:5,6-Di- <i>O</i> -isopropylidene- $\alpha/\beta$ -D-mannofuranosyl chloride 2k.....                                        | 23 |
| 3,4,6-Tri- <i>O</i> -acetyl-2-deoxy-2-phthalimido- $\alpha/\beta$ -D-glucopyranosyl chloride 2l .....                          | 24 |
| 2,3,4,6-Tetra- <i>O</i> -acetyl- $\alpha/\beta$ -D-glucopyranosyl chloride 2o .....                                            | 25 |
| 2,3,4,6-Tetra- <i>O</i> -acetyl- $\alpha/\beta$ -D-mannopyranosyl chloride 2p .....                                            | 25 |
| 4,6- <i>O</i> -Diacetyl-2,3-di- <i>O</i> - <i>tert</i> -butyldimethylsilyl- $\alpha$ -D-glucopyranosyl chloride 2q .....       | 26 |
| 3,6- <i>O</i> -Diacetyl-2,4-di- <i>O</i> - <i>tert</i> -butyldimethylsilyl- $\alpha/\beta$ -D-glucopyranosyl chloride 2r ..... | 27 |
| 3,4,6-Tri- <i>O</i> - <i>tert</i> -butyldimethylsilyl-2-deoxy- $\alpha$ -D-galactopyranosyl chloride 2s.....                   | 28 |
| 1,3-Bis[3,5-bis(trifluoromethyl)phenyl]urea 8.....                                                                             | 28 |
| One-Pot Glycosylation Using Urea Catalyst .....                                                                                | 29 |
| Mechanistic Studies (alkoxyphosphonium salt 5b) .....                                                                          | 30 |
| Anomerisation Tests .....                                                                                                      | 31 |
| References .....                                                                                                               | 32 |
| NMR Spectra .....                                                                                                              | 34 |

## General Experimental

The reagents and solvents used in the following experiments were bought commercially and used without further purification. Dry solvents were obtained using equipment based on Grubb's design<sup>1</sup> and stored in Strauss flask over 4 Å molecular sieves. A Karl Fischer Titrator was used to determine the amount of water in dry solvents. For air-sensitive reactions, solvents were added *via* syringe through rubber septa. Reactions were monitored by thin layer chromatography using silica-coated aluminum plates and the eluents outlined in the respective experiments; spots were detected under 254 nm UV light. Flash column chromatography was performed using silica gel [Davisil, 400–230 mesh (63–40 µm)]. <sup>1</sup>H NMR, <sup>13</sup>C NMR <sup>31</sup>P NMR and 2D NMR were carried out on 300 MHz, 400 MHz, 500 MHz or 600 MHz spectrometers using deuterated chloroform (CDCl<sub>3</sub>). Chemical shifts are reported in parts per million (ppm), coupling constants (*J*) are reported in Hertz (Hz) and multiplicities are abbreviated as; s (singlet), d (doublet), t (triplet) or m (multiplet) or combinations thereof. Chemical shifts were referenced to the residual proton of TMS for <sup>1</sup>H NMR spectra and to the <sup>13</sup>C signal of deuterated chloroform (CDCl<sub>3</sub>) for <sup>13</sup>C NMR spectra. For compounds not reported in literature, NMR assignments have been made using COSY, HSQC and HMBC. Mass Spectra were recorded by the University College Dublin, School of Chemistry mass spectrometry service using ESI-MS and GCMS techniques.

## Synthesis of Hemiacetals **1** and Acceptor **6**

Syntheses of benzyl-protected hemiacetals **1a-c**,<sup>2</sup> benzoyl- and acetyl-protected hemiacetals **1i,l,m-p**,<sup>3,4</sup> 2-deoxy benzyl-protected hemiacetals **1d**, **1e**,<sup>5</sup> 2-deoxy acetyl-protected hemiacetal **1f**,<sup>6</sup> acetal-protected hemiacetal **1j**<sup>7</sup> and **1k**<sup>8</sup> and methyl 2,3,4-tri-*O*-benzyl- $\alpha$ -D-glucopyranoside **6**<sup>9</sup> were carried out following literature procedures.

### 6-*O*-Acetyl-3,4-di-*O*-benzyl-2-deoxy- $\alpha/\beta$ -D-glucopyranose **1g**

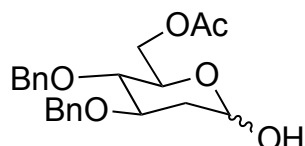

Following a literature procedure,<sup>10</sup> 6-*O*-acetyl-3,4-di-*O*-benzyl-D-glucal (462 mg, 1.25 mmol), deionised water (0.045 mL, 2.5 mmol), and Ph<sub>3</sub>P.HBr (42.9 mg, 0.125 mmol) in THF (3.1 mL) were stirred at room temperature for 24 h. Purification by column chromatography (100:0 to 95:5, DCM/Et<sub>2</sub>O) afforded the hydrolysed product **1g** as a white solid (78 mg, 16%,  $\alpha/\beta$  = 75:25). ESI-HRMS for C<sub>22</sub>H<sub>26</sub>O<sub>6</sub>Na<sup>+</sup> (M+Na)<sup>+</sup> calculated: 409.1627; found 409.1647.

#### $\alpha/\beta$

<sup>1</sup>H NMR (500 MHz, Chloroform-*d*):  $\delta$  7.40 – 7.26 (m, 10H, Ph), 4.32 (dd,  $J$  = 12.1, 2.4 Hz, 1H, H-6a), 4.27 (dd,  $J$  = 11.9, 4.5 Hz, 1H, H-6b). <sup>13</sup>C NMR (101 MHz, Chloroform-*d*):  $\delta$  171.1 (C=O), 138.5 (C), 138.2 (C), 128.5 (CH), 128.2 (CH), 128.0 (CH), 127.93 (CH), 127.86 (CH), 127.8 (CH), 63.7 (C-6).

#### $\alpha$ -OH

<sup>1</sup>H NMR (500 MHz, Chloroform-*d*):  $\delta$  5.38 (d,  $J$  = 3.4 Hz, 1H, H-1), 4.94 (d,  $J$  = 10.9 Hz, 1H, CHHPh), 4.66 (d,  $J$  = 10.8 Hz, 2H, 2 x CHHPh), 4.62 (d,  $J$  = 10.9 Hz, 1H, CHHPh), 4.10 – 4.03 (m, 2H, H-3 and H-5), 3.46 (t,  $J$  = 9.4 Hz, 1H, H-4), 2.95 (t,  $J$  = 2.6 Hz, 1H, OH), 2.31 (ddd,  $J$  = 13.1, 4.9, 1.5 Hz, 1H, H-2<sub>eq</sub>), 2.03 (s, 3H, CH<sub>3</sub>), 1.67 (dddd,  $J$  = 13.2, 11.3, 3.6, 2.0 Hz, 1H, H-2<sub>ax</sub>). <sup>13</sup>C NMR (101 MHz, Chloroform-*d*):  $\delta$  92.2 (C-1), 78.0 (C-4), 77.2 (C-3), 75.0 (PhCH<sub>2</sub>), 71.9 (PhCH<sub>2</sub>), 69.5 (C-5), 35.5 (C-2), 21.0 (CH<sub>3</sub>).

#### $\beta$ -OH

Selected signals <sup>1</sup>H NMR (500 MHz, Chloroform-*d*):  $\delta$  4.93 (d,  $J$  = 10.9 Hz, 1H, CHHPh), 4.78 (ddd,  $J$  = 9.6, 6.2, 2.0 Hz, 1H, H-1), 3.72 – 3.65 (m, 1H, H-3), 3.52 – 3.48 (m, 1H, H-5), 3.48 – 3.40 (m, 1H, H-4), 2.41 (ddd,  $J$  = 12.7, 5.0, 2.0 Hz, 1H, H-2<sub>eq</sub>), 1.58 (ddd,  $J$  = 12.6, 11.6, 9.6 Hz, 1H, H-2<sub>ax</sub>). <sup>13</sup>C NMR (101 MHz, Chloroform-*d*)  $\delta$  94.2 (C-1), 79.3 (C-3), 77.3 (C-4), 73.4 (C-5), 71.6 (PhCH<sub>2</sub>), 37.9 (C-2).

### 2,3-Di-*O*-benzyl-4-*O*-*tert*-butyldimethylsilyl- $\alpha/\beta$ -D-galactopyranose **S1**

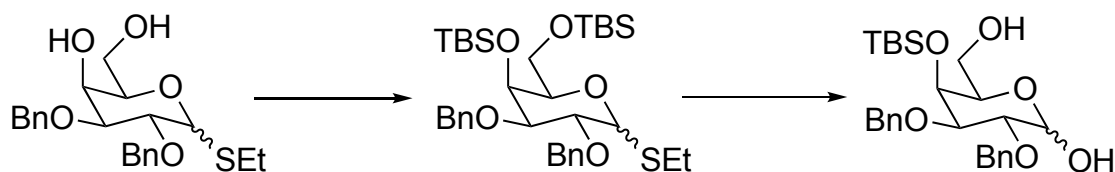

Under a  $N_2$  atmosphere, a solution of ethyl 2,3-di-*O*-benzyl-1-deoxy-1-thiol- $\alpha/\beta$ -D-galactopyranose<sup>11</sup> (270 mg, 0.667 mmol), TBSCl (404 mg, 2.68 mmol), imidazole (365 mg, 5.36 mmol) and DMAP (8 mg, 0.07 mmol) in anhydrous DMF (0.8 mL) was heated to 60 °C for 17 h. The reaction mixture was cooled to room temperature and poured over cold water. The product was extracted with pentane and washed with saturated  $NaHCO_3$ , and brine. The organic layer was dried over  $MgSO_4$ , filtered and concentrated *in vacuo*. The crude material was dissolved in 9:1 acetone/water (9 mL) and treated with NBS (176 mg, 0.989 mmol) at 0 °C. The yellow solution went colourless over 30 min, TLC analysis (3:1; cyclohexane/EtOAc) showed complete conversion of the starting material to the hydrolysed product. The reaction was quenched with saturated  $NaHCO_3$ , acetone was removed under a flow of air and then DCM was added. The organic layer was washed with saturated  $Na_2S_2O_3$  and brine, dried over  $MgSO_4$ , filtered and concentrated *in vacuo*. Purification by column chromatography (6:1 to 3:1, DCM/EtOAc) afforded the hydrolysed product **S1** as a syrup (80 mg, 25% yield over two steps,  $\alpha/\beta = 60:40$ ).

#### $\alpha/\beta$

$^1H$  NMR (300 MHz, Chloroform-*d*):  $\delta$  7.40 – 7.27 (m, 10H, Ph), 4.92 – 4.63 (m, 4H, *CHHPh*), 0.024 (s, 3H,  $SiCH_3$ ), 0.018 (s, 3H,  $SiCH_3$ ).  $^{13}C$  NMR (126 MHz, Chloroform-*d*):  $\delta$  128.5 (CH), 128.41 (CH), 128.3 (CH), 128.09 (CH), 128.0 (CH), 127.7 (CH), 26.15 ( $SiC(CH_3)_3$ ), 18.62 ( $SiC(CH_3)_3$ ), -3.85 ( $SiCH_3$ ), -4.74 ( $SiCH_3$ )

#### $\alpha$ -OH

$^1H$  NMR (300 MHz, Chloroform-*d*):  $\delta$  5.27 (d,  $J = 3.4$  Hz, 1H, H-1), 4.07 (d,  $J = 1.4$  Hz, 1H, H-4), 4.04 – 3.94 (m, 1H, H-5), 3.91 (dd,  $J = 9.8, 3.5$  Hz, 1H, H-2), 3.85 – 3.76 (m, 1H, H-6a), 3.77 (dd,  $J = 9.8, 2.6$  Hz, 1H, H-3), 3.63 – 3.50 (m, 1H, H-6b), 3.29 (s, 1H, OH), 0.86 (s, 9H,  $SiC(CH_3)_3$ ), 0.04 (s, 3H,  $SiCH_3$ ).  $^{13}C$  NMR (126 MHz, Chloroform-*d*):  $\delta$  138.4 (C), 138.2 (C), 128.6 (CH), 128.38 (CH), 128.2 (CH), 128.07 (CH), 91.9 (C-1), 77.8 (C-3), 76.1 (C-2), 73.62 ( $PhCH_2$ ), 73.58 ( $PhCH_2$ ), 72.5 (C-5), 70.2 (C-4), 63.02 (C-6).

## $\beta$ -OH

$^1\text{H}$  NMR (300 MHz, Chloroform-*d*):  $\delta$  4.70 (H-1, cross-peak in HSQC to 97.6 ppm, overlaps with *CHHPh*), 4.04 – 3.94 (m, 1H, H-4), 3.88 – 3.79 (m, 1H, H-6a), 3.66 (dd,  $J$  = 9.3, 7.0 Hz, 1H, H-2), 3.59 – 3.50 (m, 2H, H-6b, H-5), 3.41 (dd,  $J$  = 9.2, 2.7 Hz, 1H, H-3), 0.88 (s, 9H,  $\text{SiC}(\text{CH}_3)_3$ ), 0.06 (s, 3H,  $\text{SiCH}_3$ ).  $^{13}\text{C}$  NMR (126 MHz, Chloroform-*d*):  $\delta$  138.5 (C), 138.1 (C), 127.85 (CH), 127.78 (CH), 97.6 (C-1), 81.2 (C-3), 80.1 (C-2), 76.4 (C-5), 74.9 ( $\text{PhCH}_2$ ), 73.66 ( $\text{PhCH}_2$ ), 69.2 (C-4), 62.98 (C-6).

## 1,6-Di-O-acetyl-2,3-di-O-benzyl-4-O-*tert*-butyldimethylsilyl- $\alpha/\beta$ -D-galactopyranose **S2**

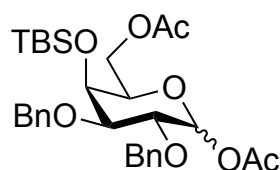

A solution of **S1** (80 mg, 0.17 mmol) in pyridine (0.5 mL) was treated with acetic anhydride (0.06 mL, 0.7 mmol) and DMAP (2 mg, 0.02 mmol) and stirred at room temperature. TLC analysis (9:1; DCM/EtOAc) after 3 h showed complete consumption of starting material. The reaction mixture was diluted with DCM and washed with 1 M HCl, saturated  $\text{NaHCO}_3$ , and brine. The organic layer was dried over  $\text{MgSO}_4$ , filtered and concentrated *in vacuo* to give **S2** a yellow syrup (quantitative,  $\alpha/\beta$  = 60:40).

## $\alpha/\beta$

$^1\text{H}$  NMR (500 MHz, Chloroform-*d*):  $\delta$  7.42 – 7.26 (m, 10H), 4.81 (d,  $J$  = 11.5 Hz, 1H, *CHHPh*).  $^{13}\text{C}$  NMR (126 MHz, Chloroform-*d*):  $\delta$  170.7 (C=O), 138.0 (C), 128.50 (CH), 128.4 (CH), 128.11 (CH), 128.0 (CH), 127.9 (CH), 127.7 (CH), 21.0 ( $\text{CH}_3$ ).

## $\alpha$ -OAc

$^1\text{H}$  NMR (500 MHz, Chloroform-*d*):  $\delta$  6.35 (d,  $J$  = 3.6 Hz, 1H, H-1), 4.73 (d,  $J$  = 11.4 Hz, 1H, *CHHPh*), 4.71 (d,  $J$  = 11.7 Hz, 1H, *CHHPh*), 4.68 (d,  $J$  = 11.7 Hz, 1H, *CHHPh*), 4.17 (dd,  $J$  = 11.1, 7.2 Hz, 1H, H-6a), 4.13 – 4.12 (m, 1H, H-4), 4.10 (dd,  $J$  = 11.2, 5.9 Hz, 1H, H-6b), 4.05 (dd,  $J$  = 10.2, 3.5 Hz, 1H, H-2), 3.99 (t,  $J$  = 6.4 Hz, 1H, H-5), 3.75 (dd,  $J$  = 10.1, 2.6 Hz, 1H, H-3), 2.07 (s, 6H, 2 x  $\text{CH}_3$ ), 0.85 (s, 9H,  $\text{SiC}(\text{CH}_3)_3$ ), 0.04 (s, 3H,  $\text{SiCH}_3$ ), 0.03 (s, 3H,  $\text{SiCH}_3$ ).  $^{13}\text{C}$  NMR (126 MHz, Chloroform-*d*):  $\delta$  169.7 (C=O), 138.33 (C), 128.53 (CH), 128.3 (CH), 128.2 (CH), 128.09 (CH), 90.9 (C-1), 77.5 (C-3), 74.6 (C-2), 73.8 ( $\text{PhCH}_2$ ), 73.4 ( $\text{PhCH}_2$ ), 71.6 (C-5), 69.8 (C-4), 63.5 (C-6), 26.09 ( $\text{SiC}(\text{CH}_3)_3$ ), 21.3 ( $\text{CH}_3$ ), 18.62 ( $\text{SiC}(\text{CH}_3)_3$ ), -3.81 ( $\text{SiCH}_3$ ), -4.9 ( $\text{SiCH}_3$ ).

### $\beta$ -OAc

$^1\text{H}$  NMR (500 MHz, Chloroform-*d*):  $\delta$  5.60 (d,  $J$  = 7.9 Hz, 1H, H-1), 4.75 – 4.71 (m, 2H, 2 x CHHPh), 4.73 (d,  $J$  = 11.2 Hz, 1H, CHHPh), 4.22 (dd,  $J$  = 11.3, 7.1 Hz, 1H, H-6a), 4.16 (dd,  $J$  = 11.2, 6.0 Hz, 1H, H-6b), 4.08 – 4.02 (m, 1H, H-4), 3.85 (dd,  $J$  = 9.6, 8.0 Hz, 1H, H-2), 3.71 (ddd,  $J$  = 6.9, 5.6, 1.0 Hz, 1H, H-5), 3.48 (dd,  $J$  = 9.7, 2.7 Hz, 1H, H-3), 2.14 (s, 6H, 2 x CH<sub>3</sub>), 0.91 (s, 9H, SiC(CH<sub>3</sub>)<sub>3</sub>), 0.10 (s, 3H, SiCH<sub>3</sub>), 0.05 (s, 3H, SiCH<sub>3</sub>).  $^{13}\text{C}$  NMR (126 MHz, Chloroform-*d*):  $\delta$  169.5 (C=O), 138.32 (C), 127.85 (CH), 127.84 (CH), 94.3 (C-1), 81.4 (C-3), 77.6 (C-2), 75.2 (PhCH<sub>2</sub>), 73.9 (C-5), 73.7 (PhCH<sub>2</sub>), 69.0 (C-4), 63.4 (C-6), 26.15 (SiC(CH<sub>3</sub>)<sub>3</sub>), 21.2 (CH<sub>3</sub>), 18.65 (SiC(CH<sub>3</sub>)<sub>3</sub>), -3.85 (SiCH<sub>3</sub>), -4.8 (SiCH<sub>3</sub>).

### 6-O-Acetyl-2,3-di-O-benzyl-4-O-*tert*-butyldimethylsilyl- $\alpha/\beta$ -D-galactopyranose **1h**

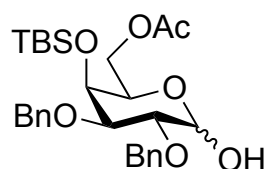

Following literature procedure,<sup>12</sup> under a N<sub>2</sub> atmosphere, a solution of **S2** (94 mg, 0.17 mmol) in anhydrous DCM (0.9 mL) was treated with TMSI (28  $\mu\text{L}$ , 0.20 mmol) in a Schlenk flask covered with aluminium foil. After stirring at room temperature for 20 min, DIPEA (35  $\mu\text{L}$ , 0.25 mmol) was added followed by deionised water (7  $\mu\text{L}$ , 0.4 mmol). The reaction was stirred at room temperature for 1 h. TLC analysis (98:2; DCM/ether) showed full consumption of starting material. The reaction was diluted with DCM and washed with saturated Na<sub>2</sub>S<sub>2</sub>O<sub>3</sub> and brine, dried over MgSO<sub>4</sub>, filtered and concentrated *in vacuo*. Purification by column chromatography (100:0 to 95:5; DCM/ether) gave the product **1h** as a white solid (66 mg, 75% yield,  $\alpha/\beta$  = 75:25).  $m/z$  (ESI-HRMS) calc'd for C<sub>28</sub>H<sub>40</sub>O<sub>7</sub>SiNa<sup>+</sup> (M+Na<sup>+</sup>): 539.2433; found 539.2441.

### $\alpha/\beta$

$^1\text{H}$  NMR (500 MHz, Chloroform-*d*):  $\delta$  7.39 – 7.27 (m, 10H).  $^{13}\text{C}$  NMR (126 MHz, Chloroform-*d*):  $\delta$  128.06 (CH), 127.73 (CH), 21.0 (CH<sub>3</sub>), -4.8 (SiCH<sub>3</sub>).

### $\alpha$ -OH

$^1\text{H}$  NMR (500 MHz, Chloroform-*d*):  $\delta$  5.24 (d,  $J$  = 3.5 Hz, 1H, H-1), 4.80 (d,  $J$  = 11.9 Hz, 1H, CHHPh), 4.76 (d,  $J$  = 11.6 Hz, 1H, CHHPh), 4.73 (d,  $J$  = 11.5 Hz, 1H, CHHPh), 4.69 (d,  $J$  = 11.8 Hz, 1H, CHHPh), 4.20 – 4.13 (m, 2H, H-6a, H-6b), 4.12 – 4.08 (m, 2H, H-4, H-5), 3.91 (dd,  $J$  = 9.8, 3.5 Hz, 1H, H-2), 3.77 (dd,  $J$  = 9.7, 2.6 Hz, 1H, H-3), 2.07 (s, 3H, CH<sub>3</sub>), 0.86 (s, 9H, SiC(CH<sub>3</sub>)<sub>3</sub>), 0.06 (s, 3H, SiCH<sub>3</sub>), 0.02 (s, 3H, SiCH<sub>3</sub>).  $^{13}\text{C}$  NMR (126 MHz,

Chloroform-*d*):  $\delta$  170.8 (C=O), 138.3 (C), 138.10 (C), 128.6 (CH), 128.4 (CH), 128.2 (CH), 128.08 (CH), 92.0 (C-1), 77.6 (C-3), 76.0 (C-2), 73.66 (PhCH<sub>2</sub>), 73.65 (PhCH<sub>2</sub>), 70.0 (C-4/5), 69.9 (C-4/5), 63.97 (C-6), 26.13 (SiC(CH<sub>3</sub>)<sub>3</sub>), 18.63 (SiC(CH<sub>3</sub>)<sub>3</sub>), -3.84 (SiCH<sub>3</sub>).

### $\beta$ -OH

<sup>1</sup>H NMR (500 MHz, Chloroform-*d*):  $\delta$  4.89 (d, *J* = 11.2 Hz, 1H, CHHPH), 4.81 (d, *J* = 11.2 Hz, 1H, CHHPH), 4.79 – 4.72 (m, 2H, 2 x CHHPH), 4.67 (d, *J* = 7.1 Hz, 1H, H-1), 4.23 (dd, *J* = 11.3, 7.1 Hz, 1H, H-6a), 4.20 – 4.16 (m, 1H, H-6b), 4.03 (dd, *J* = 2.7, 1.2 Hz, 1H, H-4), 3.66 (dd, *J* = 9.5, 7.1 Hz, 1H, H-2), 3.65 – 3.61 (m, 1H, H-5), 3.40 (dd, *J* = 9.5, 2.7 Hz, 1H, H-3), 2.07 (s, 3H, CH<sub>3</sub>), 0.88 (s, 9H, SiC(CH<sub>3</sub>)<sub>3</sub>), 0.07 (s, 3H, SiCH<sub>3</sub>), 0.04 (s, 3H, SiCH<sub>3</sub>).  
<sup>13</sup>C NMR (126 MHz, Chloroform-*d*):  $\delta$  170.9 (C=O), 138.5 (C), 138.14 (C), 128.5 (CH), 128.3 (CH), 128.09 (CH), 127.9 (CH), 127.78 (CH), 97.7 (C-1), 81.2 (C-3), 80.0 (C-2), 75.0 (PhCH<sub>2</sub>), 73.67 (PhCH<sub>2</sub>), 73.4 (C-5), 69.2 (C-4), 64.05 (C-6), 26.14 (SiC(CH<sub>3</sub>)<sub>3</sub>), 18.65 (SiC(CH<sub>3</sub>)<sub>3</sub>), -3.82 (SiCH<sub>3</sub>).

### Methyl 4-acetyl-2,3,6-tri-*O*-*tert*-butyldimethylsilyl- $\alpha$ -D-glucopyranoside **S5** and Methyl 3-acetyl-2,4,6-tri-*O*-*tert*-butyldimethylsilyl- $\alpha$ -D-glucopyranoside **S6**

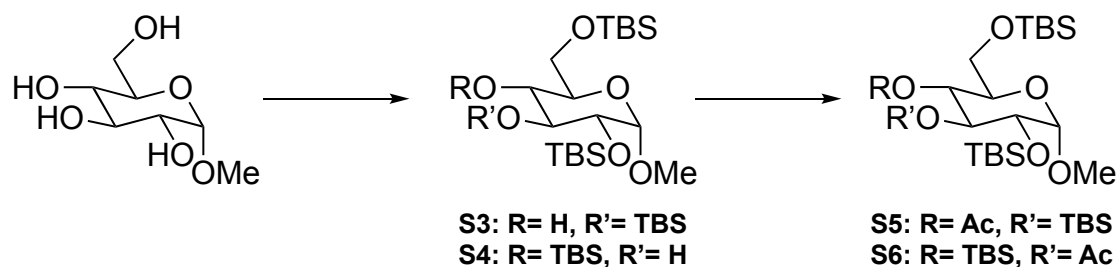

In a flame-dried 25 mL Schlenk flask placed under three cycles of vacuum and nitrogen, methyl  $\alpha$ -D-glucopyranose (1.3 g, 6.8 mmol), TBSCl (6.15 g, 40.8 mmol), imidazole (5.55 g, 81.6 mmol) and DMAP (83 mg, 0.68 mmol) were added. The solids were dissolved in dry DMF (8 mL) and stirred at 60 °C for 14 h. The reaction mixture was diluted with pentane and washed with cold water. The organic layer was washed with brine, dried over MgSO<sub>4</sub> and concentrated *in vacuo* to give a colourless syrup. Following purification by column chromatography (100:0 to 96:4, pentane/Et<sub>2</sub>O) the products **S3** and **S4** were inseparable and a syrup (3.63 g, quant.) was obtained (<sup>1</sup>H NMR spectrum of the syrup showed **S3**:**S4** = 40:60). The mixture of **S3** and **S4** (3.6 g, 6.8 mmol) and DMAP (82 mg, 0.67 mmol) were dissolved in anhydrous pyridine (1.1 mL, 14 mmol). The solution was treated with acetic anhydride (1.3 mL, 14 mmol) and stirred at room temperature for 3 h. The reaction mixture was diluted with DCM and washed with 1 M HCl, followed by saturated NaHCO<sub>3</sub> and brine, dried over MgSO<sub>4</sub> and concentrated *in vacuo*. Trituration with pentane/MeOH afforded **S5** as a white

solid (840 mg, 21% yield) and **S6** as a colourless syrup (840 mg, 21%). NMR data were consistent with literature data.<sup>13</sup>

#### **S5**

<sup>1</sup>H NMR (500 MHz, Chloroform-*d*): δ 4.70 (dd, *J* = 10.1, 8.8 Hz, 1H, H-4), 4.66 (d, *J* = 3.4 Hz, 1H, H-1), 3.94 (t, *J* = 8.9 Hz, 1H, H-3), 3.69 – 3.52 (m, 4H, H-2, 5, 6a, 6b), 3.38 (s, 3H, OCH<sub>3</sub>), 2.06 (s, 3H, CH<sub>3</sub>), 0.92, 0.88, 0.84 (s x 3, 27H, SiC(CH<sub>3</sub>)<sub>3</sub>), 0.10 (s, 6H, 2 x SiCH<sub>3</sub>), 0.09, 0.06, 0.05, 0.04 (s x 4, 12H, SiCH<sub>3</sub>).

#### **S6**

<sup>1</sup>H NMR (500 MHz, Chloroform-*d*): δ 5.26 (dd, *J* = 9.8, 8.7 Hz, 1H, H-3), 4.60 (d, *J* = 3.6 Hz, 1H, H-1), 3.81 (dd, *J* = 11.3, 2.0 Hz, 1H, H-6a), 3.72 (dd, *J* = 11.3, 5.0 Hz, 1H, H-6b), 3.65 – 3.56 (m, 2H, H-4, H-5), 3.55 (dd, *J* = 9.7, 3.6 Hz, 1H, H-2), 3.38 (s, 3H, OCH<sub>3</sub>), 2.06 (s, 3H, CH<sub>3</sub>), 0.90, 0.86, 0.84 (s x 3, 27H, SiC(CH<sub>3</sub>)<sub>3</sub>), 0.08, 0.06, 0.06, 0.03 (s x 4, 18H, SiCH<sub>3</sub>).

#### **4,6-Diacetyl-2,3,-di-*O*-*tert*-butyldimethylsilyl- $\alpha$ -D-glucopyranoside 1q**

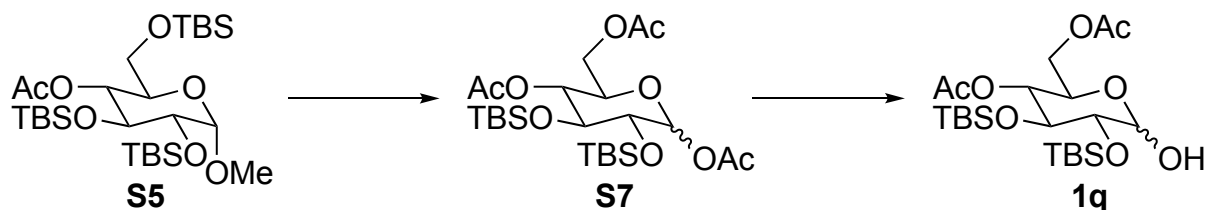

Following the literature procedure,<sup>12,14</sup> **S5** (637 mg, 1.10 mmol) was treated with acetic anhydride (6 mL) and conc. H<sub>2</sub>SO<sub>4</sub> (a few drops, cat.) was added at 0 °C and the reaction mixture was stirred at room temperature for 1 h. The reaction mixture was diluted with DCM and washed with water, saturated NaHCO<sub>3</sub> and brine, dried over MgSO<sub>4</sub> and concentrated *in vacuo* to get crude **S7** as a colourless syrup. Under a nitrogen atmosphere, the crude **S7** was dissolved in dry DCM (5.5 mL) and treated with TMSI (0.31 mL, 2.2 mmol) at room temperature. After the brown reaction mixture was stirred at this temperature for 1 h, the solvent was removed and then the residue was re-dissolved in acetone (5.5 mL) and treated with Ag<sub>2</sub>CO<sub>3</sub> (334 mg, 1.21 mmol) and water (0.04 mL, 2 mmol). The reaction mixture was stirred at room temperature for 1 h. After purification by column chromatography (*R*<sub>f</sub> = 0.36; 2:1, pentane/Et<sub>2</sub>O), the title compound **1q** was obtained as a very thick syrup (100 mg, 18% yield over three steps,  $\alpha/\beta$  = 83:17).

*m/z* (ESI-HRMS) calc'd for C<sub>22</sub>H<sub>45</sub>O<sub>8</sub>Si<sub>2</sub><sup>+</sup> (M+H<sup>+</sup>): 493.2647; found 493.2653.

## S7

### $\alpha/\beta$

$^1\text{H}$  NMR (500 MHz, Chloroform-*d*):  $\delta$  2.08 (s, 3H,  $\text{CH}_3$ ).  $^{13}\text{C}$  NMR (126 MHz, Chloroform-*d*):  $\delta$  25.96 ( $\text{SiC}(\text{CH}_3)_3$ ).

### $\alpha\text{-OAc}$

$^1\text{H}$  NMR (500 MHz, Chloroform-*d*):  $\delta$  6.12 (d,  $J = 3.5$  Hz, 1H, H-1), 4.95 (dd,  $J = 10.3, 8.9$  Hz, 1H, H-4), 4.16 (dd,  $J = 12.4, 4.7$  Hz, 1H, H-6a), 3.98 (dd,  $J = 12.4, 2.4$  Hz, 1H, H-6b), 3.95 (t,  $J = 8.9$  Hz, 1H, H-3), 3.90 (ddd,  $J = 10.2, 4.7, 2.6$  Hz, 1H, H-5), 3.75 (dd,  $J = 8.8, 3.6$  Hz, 1H, H-2), 2.14 (s, 3H,  $\text{CH}_3$ ), 2.073 (s, 3H,  $\text{CH}_3$ ), 0.869 (s, 9H,  $\text{SiC}(\text{CH}_3)_3$ ), 0.861 (s, 9H,  $\text{SiC}(\text{CH}_3)_3$ ), 0.12 (s, 3H,  $\text{SiCH}_3$ ), 0.104 (s, 3H,  $\text{SiCH}_3$ ), 0.094 (s, 3H,  $\text{SiCH}_3$ ), 0.087 (s, 3H,  $\text{SiCH}_3$ ).  $^{13}\text{C}$  NMR (126 MHz, Chloroform-*d*):  $\delta$  171.0 (C=O), 169.65 (C=O), 169.54 (C=O), 91.8 (C-1), 72.7 (C-2), 72.0 (C-3), 70.8 (C-4), 70.2 (C-5), 62.4 (C-6), 26.2 ( $\text{SiC}(\text{CH}_3)_3$ ), 21.42 ( $\text{CH}_3$ ), 21.1 ( $\text{CH}_3$ ), 20.95 ( $\text{CH}_3$ ), 18.1 ( $\text{SiC}(\text{CH}_3)_3$ ), 18.00 ( $\text{SiC}(\text{CH}_3)_3$ ), -2.8 ( $\text{SiCH}_3$ ), -3.7 ( $\text{SiCH}_3$ ), -4.2 (2 x  $\text{SiCH}_3$ ).

### $\beta\text{-OAc}$

$^1\text{H}$  NMR (500 MHz, Chloroform-*d*):  $\delta$  5.62 (d,  $J = 5.9$  Hz, 1H, H-1), 4.99 – 4.91 (m, 1H, H-4), 4.27 (dd,  $J = 12.2, 5.6$  Hz, 1H, H-6a), 4.08 (dd,  $J = 12.1, 3.5$  Hz, 1H, H-6b), 3.85 (ddd,  $J = 8.1, 5.6, 3.4$  Hz, 1H, H-5), 3.78 (dd,  $J = 6.1, 7.3$  Hz, 1H, H-3), 3.67 (t,  $J = 6.0$  Hz, 1H, H-2), 2.12 (s, 3H,  $\text{CH}_3$ ), 2.068 (s, 3H,  $\text{CH}_3$ ), 0.879 (s, 9H,  $\text{SiC}(\text{CH}_3)_3$ ), 0.874 (s, 9H,  $\text{SiC}(\text{CH}_3)_3$ ), 0.16 (s, 3H,  $\text{SiCH}_3$ ), 0.101 (s, 3H,  $\text{SiCH}_3$ ), 0.097 (s, 3H,  $\text{SiCH}_3$ ).  $^{13}\text{C}$  NMR (126 MHz, Chloroform-*d*):  $\delta$  169.9 (C=O), 169.51 (C=O), 94.4 (C-1), 74.2 (C-3), 73.1 (C-2), 72.8 (C-5), 70.4 (C-4), 63.0 (C-6), 26.01 ( $\text{SiC}(\text{CH}_3)_3$ ), 21.5 ( $\text{CH}_3$ ), 21.41 ( $\text{CH}_3$ ), 20.97 ( $\text{CH}_3$ ), 18.2 ( $\text{SiC}(\text{CH}_3)_3$ ), 18.02 ( $\text{SiC}(\text{CH}_3)_3$ ), -3.1, -3.3, -4.06, -4.15 (4 x  $\text{SiCH}_3$ ).

## 1q

### $\alpha\text{-OH}$

$^1\text{H}$  NMR (500 MHz, Chloroform-*d*):  $\delta$  5.18 (t,  $J = 3.5$  Hz, 1H, H-1), 4.87 (dd,  $J = 9.6, 8.0$  Hz, 1H, H-4), 4.21 (dd,  $J = 12.2, 5.1$  Hz, 1H, H-6a), 4.11 (ddd,  $J = 9.7, 5.1, 2.5$  Hz, 1H, H-5), 4.04 (dd,  $J = 12.2, 2.6$  Hz, 1H, H-6b), 3.94 (t,  $J = 8.0$  Hz, 1H, H-3), 3.69 (dd,  $J = 8.0, 3.4$  Hz, 1H, H-2), 3.03 (d,  $J = 3.5$  Hz, 1H, OH), 2.09 (s, 3H,  $\text{CH}_3$ ), 2.08 (s, 3H,  $\text{CH}_3$ ), 0.94 (s, 9H,  $\text{SiC}(\text{CH}_3)_3$ ), 0.86 (s, 9H,  $\text{SiC}(\text{CH}_3)_3$ ), 0.14, 0.13, 0.10, 0.09 (s x 4, 12 H,  $\text{SiCH}_3$ ).  $^{13}\text{C}$  NMR (126 MHz, Chloroform-*d*):  $\delta$  171.04 (C=O), 169.85 (C=O), 92.8 (C-1), 73.9 (C-2), 71.8 (C-

3), 70.9 (C-4), 68.8 (C-5), 62.8 (C-6), 26.3 (SiC(CH<sub>3</sub>)<sub>3</sub>), 25.9 (SiC(CH<sub>3</sub>)<sub>3</sub>), 21.4 (CH<sub>3</sub>), 21.0 (CH<sub>3</sub>), 18.3 (SiC(CH<sub>3</sub>)<sub>3</sub>), 18.0 (SiC(CH<sub>3</sub>)<sub>3</sub>), -3.1, -3.5, -4.2, -4.4 (4 x SiCH<sub>3</sub>).

### **β-OH**

<sup>1</sup>H NMR (500 MHz, Chloroform-*d*): δ 4.90 (dd, *J* = 8.6, 5.5 Hz, 1H, H-4), 4.79 (dd, *J* = 8.4, 4.3 Hz, 1H, H-1), 4.19 – 4.13 (m, 2H, H-6a, H-6b), 3.87 (ddd, *J* = 8.9, 5.7, 3.4 Hz, 1H, H-5), 3.76 (t, *J* = 5.8 Hz, 1H, H-3), 3.61 (dd, *J* = 5.9, 4.4 Hz, 1H, H-2), 3.28 (d, *J* = 8.5 Hz, 1H, OH), 2.08 (s, 3H, CH<sub>3</sub>), 2.07 (s, 3H, CH<sub>3</sub>), 0.92 (s, 9H, SiC(CH<sub>3</sub>)<sub>3</sub>), 0.89 (s, 9H, SiC(CH<sub>3</sub>)<sub>3</sub>), 0.14, 0.125, 0.119, 0.10 (s x 4, 12H, SiCH<sub>3</sub>). <sup>13</sup>C NMR (126 MHz, Chloroform-*d*) selected signals: δ 97.5 (C-1), 74.7, (C-2) 74.3 (C-3), 71.2 (C-4 and C-5), 63.9 (C-6), 26.2 (SiC(CH<sub>3</sub>)<sub>3</sub>), 21.3 (CH<sub>3</sub>), -3.8, -4.0 (2 x SiCH<sub>3</sub>).

### **3,6-Diacetyl-2,4-di-*O*-*tert*-butyldimethylsilyl-α-D-glucopyranoside 1r**

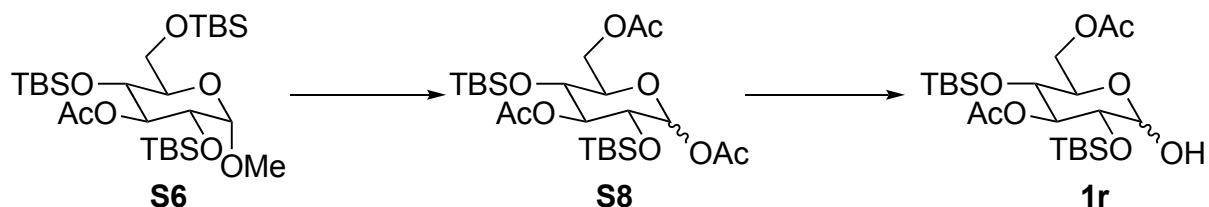

Following the literature procedure,<sup>12,14</sup> **S6** (830 mg, 1.43 mmol) was treated with acetic anhydride (6 mL) and conc. H<sub>2</sub>SO<sub>4</sub> (a few drops, cat.) was added at 0 °C and the reaction mixture was stirred at room temperature for 1 h. The reaction mixture was diluted with DCM and washed with water, saturated NaHCO<sub>3</sub> and brine, dried over MgSO<sub>4</sub> and concentrated *in vacuo* to get crude **S8** as a colourless syrup. Under a nitrogen atmosphere, the crude **S8** was dissolved in dry DCM (7.1 mL) and treated with TMSI (0.41 mL, 2.9 mmol) at room temperature. After the brown reaction mixture was stirred at this temperature for 1 h, the solvent was removed and then the residue was re-dissolved in acetone (7.1 mL) and treated with Ag<sub>2</sub>CO<sub>3</sub> (433 mg, 1.57 mmol) and water (0.05 mL, 3 mmol). The reaction mixture was stirred at room temperature for 1 h. After purification by column chromatography (*R*<sub>f</sub> = 0.30; 2:1, pentane/Et<sub>2</sub>O), the title compound **1r** was obtained as a very thick syrup (150 mg, 21% yield over three steps, α/β = 67:33).

*m/z* (ESI-HRMS) calc'd for C<sub>22</sub>H<sub>44</sub>O<sub>8</sub>Si<sub>2</sub>Na<sup>+</sup> (M+Na<sup>+</sup>): 515.2467; found 515.2472.

### **S8**

#### **α/β**

<sup>1</sup>H NMR (500 MHz, Chloroform-*d*): δ 0.046 (s, 3H, SiCH<sub>3</sub>).

**$\alpha$ -OAc**

$^1\text{H}$  NMR (500 MHz, Chloroform-*d*):  $\delta$  6.13 (d,  $J = 3.8$  Hz, 1H, H-1), 5.29 (t,  $J = 9.4$  Hz, 1H, H-3), 4.32 (dd,  $J = 12.2, 2.2$  Hz, 1H, H-6a), 4.10 (dd,  $J = 12.1, 4.2$  Hz, 1H, H-6b), 3.88 (ddd,  $J = 9.6, 4.1, 2.2$  Hz, 1H, H-5), 3.75 (t,  $J = 9.4$  Hz, 1H, H-4), 3.73 (dd,  $J = 9.6, 3.9$  Hz, 1H, H-2), 2.16 (s, 3H, CH<sub>3</sub>), 2.093 (s, 3H, CH<sub>3</sub>), 2.092 (s, 3H, CH<sub>3</sub>), 0.85 (s, 9H, SiC(CH<sub>3</sub>)<sub>3</sub>), 0.82 (s, 9H, SiC(CH<sub>3</sub>)<sub>3</sub>), 0.054 (s, 3H, SiCH<sub>3</sub>), 0.053 (s, 3H, SiCH<sub>3</sub>), 0.04 (s, 3H, SiCH<sub>3</sub>).  $^{13}\text{C}$  NMR (126 MHz, Chloroform-*d*):  $\delta$  170.80 (C=O), 169.67 (C=O), 169.59 (C=O), 91.2 (C-1), 75.10 (C-3), 72.3 (C-5), 70.5 (C-2), 68.9 (C-4), 62.82 (C-6), 25.8 (SiC(CH<sub>3</sub>)<sub>3</sub>), 25.5 (SiC(CH<sub>3</sub>)<sub>3</sub>), 22.0 (CH<sub>3</sub>), 21.14 (CH<sub>3</sub>), 21.0 (CH<sub>3</sub>), 18.0 (SiC(CH<sub>3</sub>)<sub>3</sub>), 17.8 (SiC(CH<sub>3</sub>)<sub>3</sub>), -3.9, -4.5, -4.8, -5.0 (4 x SiCH<sub>3</sub>).

 **$\beta$ -OAc**

$^1\text{H}$  NMR (500 MHz, Chloroform-*d*):  $\delta$  5.52 (d,  $J = 7.9$  Hz, 1H, H-1), 5.12 (t,  $J = 9.0$  Hz, 1H, H-3), 4.35 (dd,  $J = 12.7, 2.6$  Hz, 1H, H-6a), 4.07 (dd,  $J = 12.7, 4.9$  Hz, 1H, H-6a), 3.71 (t,  $J = 9.1$  Hz, 1H, H-4), 3.66 – 3.59 (m, 1H, H-5), 3.63 (dd,  $J = 9.2, 8.0$  Hz, 1H, H-2), 2.12 (s, 3H, CH<sub>3</sub>), 2.11 (s, 3H, CH<sub>3</sub>), 2.08 (s, 3H, CH<sub>3</sub>), 0.84 (s, 9H, SiC(CH<sub>3</sub>)<sub>3</sub>), 0.83 (s, 9H, SiC(CH<sub>3</sub>)<sub>3</sub>), 0.10 (s, 3H, SiCH<sub>3</sub>), 0.07 (s, 3H, SiCH<sub>3</sub>), 0.02 (s, 3H, SiCH<sub>3</sub>).  $^{13}\text{C}$  NMR (126 MHz, Chloroform-*d*):  $\delta$  170.83 (C=O), 169.60 (C=O), 169.1 (C=O), 94.3 (C-1), 77.7 (C-3), 75.10 (C-5), 72.0 (C-2), 69.1 (C-4), 62.85 (C-6), 25.7 (SiC(CH<sub>3</sub>)<sub>3</sub>), 25.6 (SiC(CH<sub>3</sub>)<sub>3</sub>), 22.2 (CH<sub>3</sub>), 21.3 (CH<sub>3</sub>), 21.07 (CH<sub>3</sub>), 17.97 (SiC(CH<sub>3</sub>)<sub>3</sub>), 17.96 (SiC(CH<sub>3</sub>)<sub>3</sub>), -3.4, -4.1, -4.4, -4.7 (4 x SiCH<sub>3</sub>).

**1r** **$\alpha/\beta$** 

$^1\text{H}$  NMR (500 MHz, Chloroform-*d*):  $\delta$  2.10 (s, 3H, CH<sub>3</sub>), 2.09 (s, 3H, CH<sub>3</sub>), 0.84 (s, 9H, SiC(CH<sub>3</sub>)<sub>3</sub>), 0.04 (s, 3H, SiCH<sub>3</sub>).  $^{13}\text{C}$  NMR (126 MHz, Chloroform-*d*):  $\delta$  25.7 (SiC(CH<sub>3</sub>)<sub>3</sub>), 21.1 (CH<sub>3</sub>).

 **$\alpha$ -OH**

$^1\text{H}$  NMR (500 MHz, Chloroform-*d*):  $\delta$  5.24 (t,  $J = 9.2$  Hz, 1H, H-3), 5.12 (dd,  $J = 3.8, 1.8$  Hz, 1H, H-1), 4.37 (dd,  $J = 12.0, 2.1$  Hz, 1H, H-6a), 4.12 (dd,  $J = 11.9, 4.4$  Hz, 1H, H-6b), 4.07 (ddd,  $J = 9.6, 4.4, 2.0$  Hz, 1H, H-5), 3.70 (t,  $J = 9.4$  Hz, 1H, H-4), 3.65 (dd,  $J = 9.5, 3.6$  Hz, 1H, H-2), 3.13 (d,  $J = 1.8$  Hz, 1H, OH), 0.87 (s, 9H, SiC(CH<sub>3</sub>)<sub>3</sub>), 0.08, 0.07, 0.03 (s x 3, 9H, SiCH<sub>3</sub>).  $^{13}\text{C}$  NMR (126 MHz, Chloroform-*d*):  $\delta$  170.94 (C=O), 169.7 (C=O), 92.9 (C-1), 75.1

(C-3), 72.2 (C-2), 70.2 (C-5), 68.9 (C-4), 63.1 (C-6), 25.6 (SiC(CH<sub>3</sub>)<sub>3</sub>), 22.0 (CH<sub>3</sub>), 18.01 (SiC(CH<sub>3</sub>)<sub>3</sub>), 17.9 (SiC(CH<sub>3</sub>)<sub>3</sub>), -3.90, -4.43, -4.80, -4.81 (4 x SiCH<sub>3</sub>).

### β-OH

<sup>1</sup>H NMR (500 MHz, Chloroform-*d*): δ 5.06 (t, *J* = 9.2 Hz, 1H, H-3), 4.65 (dd, *J* = 7.5, 5.4 Hz, 1H, H-1), 4.41 (dd, *J* = 12.0, 2.2 Hz, 1H, H-6a), 4.03 (dd, *J* = 12.0, 5.2 Hz, 1H, H-6b), 3.73 – 3.62 (m, 1H, H-4), 3.52 (ddd, *J* = 9.4, 5.1, 2.2 Hz, 1H, H-5), 3.41 (dd, *J* = 9.4, 7.4 Hz, 1H, H-2), 3.17 (dd, *J* = 5.3 Hz, 1H, OH), 0.85 (s, 9H, SiC(CH<sub>3</sub>)<sub>3</sub>), 0.11, 0.06, 0.03 (s x 3, 9H, SiCH<sub>3</sub>). <sup>13</sup>C NMR (126 MHz, Chloroform-*d*) δ 170.91 (C=O), 169.8 (C=O), 97.5 (C-1), 77.6 (C-3), 74.6 (C-2), 74.5 (C-5), 69.3 (C-4), 63.2 (C-6), 25.8 (SiC(CH<sub>3</sub>)<sub>3</sub>), 22.2 (CH<sub>3</sub>), 18.1 (SiC(CH<sub>3</sub>)<sub>3</sub>), 17.97 (SiC(CH<sub>3</sub>)<sub>3</sub>), -3.83, -4.62, -4.65 (3 x SiCH<sub>3</sub>).

### 3,4,6-Tri-*O*-*tert*-butyldimethylsilyl-2-deoxy-α/β-D-galactopyranose 1s

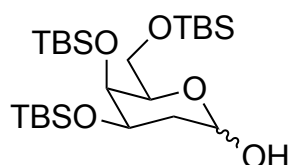

Following a literature procedure,<sup>15</sup> 3,4,6-tri-*O*-*tert*-butyldimethylsilyl-D-galactal<sup>15</sup> (200 mg, 0.409 mmol), deionised water (0.04 mL, 2.0 mmol), and TsOH.2H<sub>2</sub>O (7.8 mg, 0.041 mmol) in DCM (1.64 mL) were stirred at room temperature for 4 h. Purification by column chromatography (100:0 to 95:5, DCM/Et<sub>2</sub>O) afforded the hydrolysed product **1s** as a syrup (130 mg, 63%, α/β = 75:25). ESI-HRMS for C<sub>24</sub>H<sub>54</sub>O<sub>5</sub>Si<sub>3</sub>Na<sup>+</sup> (M+Na)<sup>+</sup> calculated: 529.3177; found 529.3159.

### α/β

<sup>1</sup>H NMR (500 MHz, Chloroform-*d*): 0.09, 0.08 (s x 2, 6H, SiCH<sub>3</sub>), 0.06 (s, 6H, 2 x SiCH<sub>3</sub>). <sup>13</sup>C NMR (101 MHz, Chloroform-*d*): δ 26.4 (SiC(CH<sub>3</sub>)<sub>3</sub>), 26.3 (SiC(CH<sub>3</sub>)<sub>3</sub>), 26.1 (SiC(CH<sub>3</sub>)<sub>3</sub>), 18.75 (SiC(CH<sub>3</sub>)<sub>3</sub>), 18.69 (SiC(CH<sub>3</sub>)<sub>3</sub>), 18.4 (SiC(CH<sub>3</sub>)<sub>3</sub>), -3.8 (SiCH<sub>3</sub>), -4.2 (SiCH<sub>3</sub>), -4.5 (SiCH<sub>3</sub>), -4.7 (SiCH<sub>3</sub>), -5.07 (SiCH<sub>3</sub>), -5.11 (SiCH<sub>3</sub>).

### α-OH

<sup>1</sup>H NMR (500 MHz, Chloroform-*d*): δ 5.34 (br s, 1H, H-1), 4.10 (ddd, *J* = 11.7, 4.3, 2.3 Hz, 1H, H-3), 3.88 – 3.83 (m, 2H, H-4 and H-5), 3.69 (dd, *J* = 10.1, 7.0 Hz, 1H, H-6a), 3.62 (dd, *J* = 10.0, 6.3 Hz, 1H, H-6b), 2.43 (t, *J* = 2.4 Hz, 1H, OH), 2.09 (tdd, *J* = 12.5, 3.6, 2.2 Hz, 1H, H-2a), 1.65 (ddt, *J* = 12.5, 4.4, 1.3 Hz, 1H, H-2b), 0.92, 0.90, 0.89 (s x 3, 27H, SiC(CH<sub>3</sub>)<sub>3</sub>), 0.11, 0.10 (s x 2, 6H, SiCH<sub>3</sub>). <sup>13</sup>C NMR (101 MHz, Chloroform-*d*): δ 92.9 (C-1), 73.1 (C-4 or C-5), 70.4 (C-4 or C-5), 68.0 (C-3), 62.7 (C-6), 33.8 (C-2).

**$\beta$ -OH**

$^1\text{H}$  NMR (500 MHz, Chloroform-*d*):  $\delta$  4.74 (ddd,  $J = 9.3, 7.8, 2.5$  Hz, 1H, H-1), 3.82 – 3.80 (m, 1H, H-4), 3.75 (dd,  $J = 10.0, 7.6$  Hz, 1H, H-6a), 3.71 – 3.65 (m, 2H, H-3 and H-6b), 3.31 (ddd,  $J = 7.7, 5.8, 1.0$  Hz, 1H, H-5), 2.92 (d,  $J = 7.8$  Hz, 1H, OH), 1.91 (td,  $J = 11.7, 9.4$  Hz, 1H, H-2a), 1.86 – 1.80 (m, 1H, H-2b), 0.91 (br s, 18H,  $\text{SiC}(\text{CH}_3)_3$ ), 0.89 (s, 9H,  $\text{SiC}(\text{CH}_3)_3$ ), 0.12, 0.10 (s x 2, 6H,  $\text{SiCH}_3$ ).  $^{13}\text{C}$  NMR (101 MHz, Chloroform-*d*):  $\delta$  94.7 (C-1), 76.7 (C-5), 71.5 (C-3), 68.9 (C-4), 62.0 (C-6), 37.5 (C-2).

## General Procedure A for synthesis of Glycosyl Chlorides

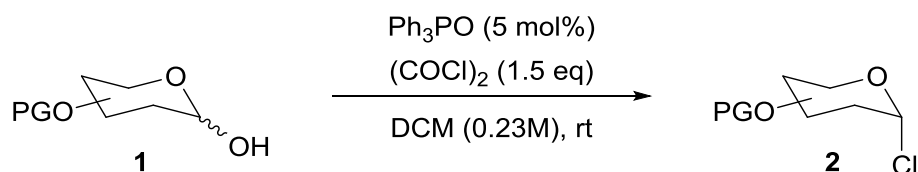

A 25 mL crimp-top vial charged with a stir-bar, hemiacetal (1 eq) and triphenylphosphine oxide (5 mol%) was placed under three cycles of vacuum and nitrogen. The solids were dissolved in anhydrous DCM (0.23 M), treated with oxalyl chloride (1.5 eq) and left to stir at room temperature. The reactions were monitored by  $^1\text{H}$  NMR spectroscopy and spectroscopic yields were determined by quantitative  $^1\text{H}$  NMR spectroscopy using dimethyl sulfone as an internal standard.

## Procedure for Slow Addition of hemiacetal and Oxalyl Chloride

A 25 mL Schlenk flask charged with triphenylphosphine oxide (15 mol%) was placed under three cycles of vacuum and nitrogen. The phosphine oxide was dissolved in anhydrous  $\text{CHCl}_3$  (0.1 M), treated with oxalyl chloride (15 mol%) and stirred till no effervescence was observed. To this mixture was added solutions of the hemiacetal (1 eq) and oxalyl chloride (1 eq) in anhydrous  $\text{CHCl}_3$  (0.25 M) slowly over a period of 7 h using a syringe pump.

## Procedure for Uncatalysed Reactions

A 25 mL crimp-top vial charged with a stir-bar and hemiacetal (1 eq) was placed under three cycles of vacuum and nitrogen. The hemiacetal was dissolved in anhydrous DCM (0.23 M), treated with oxalyl chloride (1.5 eq) and left to stir at room temperature. The reactions were monitored by  $^1\text{H}$  NMR spectroscopy and spectroscopic yields were determined by quantitative  $^1\text{H}$  NMR spectroscopy using dimethyl sulfone as an internal standard.

## General Procedure B for synthesis of Glycosyl Chlorides

A 25 mL crimp-top vial charged with a stir-bar and hemiacetal (1 eq) was placed under three cycles of vacuum and nitrogen. A stock solution of the chlorotriphenylphosphonium chloride salt in DCM (1.0 eq, 0.23 M) was added to the reaction flask and left to stir at room temperature. The reactions were monitored by  $^1\text{H}$  NMR spectroscopy and spectroscopic

yields were determined by quantitative  $^1\text{H}$  NMR spectroscopy using dimethyl sulfone as an internal standard.

#### **Preparation of stock solution of chlorotriphenylphosphonium chloride salt**

A flame-dried 25 mL Schlenk flask was charged with triphenylphosphine oxide (1 eq) and a magnetic stirbar. The flask was placed under three cycles of vacuum and nitrogen. A solution of the phosphine oxide in dry DCM (0.23 M) was treated with oxalyl chloride (1.5 eq) and left to stir at room temperature for 15 min. The stock solution was stored in a 25 ml Young's tube under nitrogen (*the Young's tube was flamed-dried and placed under three cycles of vacuum and nitrogen prior to use*).

### **General Procedure C for synthesis of Glycosyl Chlorides**

A 25 mL crimp-top vial charged with a stir-bar and hemiacetal (1 eq) was placed under three cycles of vacuum and nitrogen. A stock solution of the chlorotriphenylphosphonium chloride salt in DCM (1.2 eq, 0.28 M) was added to the reaction flask and left to stir at room temperature. The reactions were monitored by  $^1\text{H}$  NMR spectroscopy and spectroscopic yields were determined by quantitative  $^1\text{H}$  NMR spectroscopy using dimethyl sulfone as an internal standard.

#### **Preparation of stock solution of chlorotriphenylphosphonium chloride salt**

A flame-dried 25 mL Schlenk flask was charged with triphenylphosphine oxide (1 eq) and a magnetic stirbar. The flask was placed under three cycles of vacuum and nitrogen. A solution of the phosphine oxide in dry DCM (0.28 M) was treated with oxalyl chloride (1 eq) and left to stir at room temperature for 15 min. The stock solution was stored in a 25 ml Young's tube under nitrogen (*the Young's tube was flamed-dried and placed under three cycles of vacuum and nitrogen prior to use*).

### 2,3,4,6-Tetra-O-benzyl- $\alpha$ -D-glucopyranosyl chloride **2a**

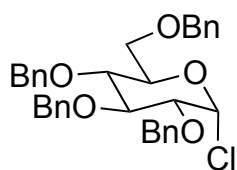

Following the general procedure A, hemiacetal **1a** (114.6 mg, 0.212 mmol) was used. After 2 h  $^1\text{H}$  NMR spectroscopy showed complete consumption of the hemiacetal to give glycosyl chloride **2a** (93% spectroscopic yield,  $\alpha/\beta = 95:5$ ).

#### Gram scale synthesis

Following the general procedure, hemiacetal **1a** (1.50 g, 2.77 mmol) was used. After 3 h,  $^1\text{H}$  NMR showed complete consumption of the hemiacetal. After a short quick column ( $R_f = 0.9$ , cyclohexane/ethyl acetate; 1:2) the pure glucosyl chloride **2a** was obtained as a cloudy white syrup (1.44 g, 93% yield,  $\alpha/\beta = 95:5$ ).

$^1\text{H}$  NMR (500 MHz, Chloroform- $d$ ):  $\delta$  7.38–7.25 (m, 18H, Ph), 7.14 (dd,  $J = 7.4, 2.1$  Hz, 2H, Ph), 6.07 (d,  $J = 3.7$  Hz, 1H,  $\alpha$ -H), 5.20 (d,  $J = 7.8$  Hz, 0.05H,  $\beta$ -H), 4.97 (d,  $J = 10.8$  Hz, 1H, CHHPh), 4.83 (d,  $J = 10.7$  Hz, 1H, CHHPh), 4.82 (d,  $J = 10.8$  Hz, 1H, CHHPh), 4.75–4.67 (m, 2H,  $2 \times$  CHHPh), 4.57 (d,  $J = 12.1$  Hz, 1H, CHHPh), 4.50 (d,  $J = 10.8$  Hz, 1H, CHHPh), 4.46 (d,  $J = 12.1$  Hz, 1H, CHHPh), 4.08 (dt,  $J = 10.2, 2.3$  Hz, 1H, H-5), 4.03 (t,  $J = 9.2$  Hz, 1H, H-3), 3.78–3.70 (m, 3H, H-2, H-4, H-6a), 3.64 (dd,  $J = 11.0, 1.9$  Hz, 1H, H-6b).  $^{13}\text{C}$  NMR (101 MHz, Chloroform- $d$ ):  $\delta$  138.6 (C), 138.1 (C), 137.7 (C), 137.5 (C), 128.7 (CH), 128.52 (CH), 128.50 (CH), 128.2 (CH), 128.15 (CH), 128.07 (CH), 128.05 (CH), 127.97 (CH), 127.91 (CH), 127.90 (CH), 127.8 (CH), 93.6 (C-1), 81.5 (C-3), 79.9 (C-2), 76.5 (C-4), 75.9 (PhCH $_2$ ), 75.3 (PhCH $_2$ ), 73.6 (PhCH $_2$ ), 73.5 (C-5), 73.0 (PhCH $_2$ ), 67.8 (C-6). NMR data were consistent with literature data.<sup>16,17</sup>

### 2,3,4,6-Tetra-O-benzyl- $\alpha$ -D-galactopyranosyl chloride **2b**

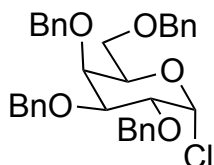

Following the general procedure A, hemiacetal **1b** (114.6 mg, 0.212 mmol) was used. After 16 h  $^1\text{H}$  NMR spectroscopy showed complete consumption of the hemiacetal to give glycosyl chloride **2b** (72% spectroscopic yield,  $\alpha/\beta \geq 95:5$ ).

$^1\text{H}$  NMR (500 MHz, Chloroform- $d$ ):  $\delta$  7.42–7.20 (m, 20H, Ph), 6.14 (d,  $J = 3.8$  Hz, 1H, H-1), 4.94 (d,  $J = 11.3$  Hz, 1H, CHHPh), 4.85 (d,  $J = 11.7$  Hz, 1H, CHHPh), 4.78–4.72 (m, 2H,  $2 \times$

CHHPh), 4.71(d,  $J = 11.6$  Hz, 1H, CHHPh), 4.56 (d,  $J = 11.3$  Hz, 1H, CHHPh), 4.48 (d,  $J = 11.8$  Hz, 1H, CHHPh), 4.40 (d,  $J = 11.8$  Hz, 1H, CHHPh), 4.25–4.21 (m, 1H, H-5), 4.21 (dd,  $J = 9.8, 3.8$  Hz, 1H, H-2), 4.01–3.99 (m, 1H, H-4), 3.97 (dd,  $J = 9.7, 2.8$  Hz, 1H, H-3), 3.55 (dd,  $J = 9.4, 6.9$  Hz, 1H, H-6a), 3.53 (dd,  $J = 9.4, 6.1$  Hz, 1H, H-6b).  $^{13}\text{C}$  NMR (101 MHz, Chloroform- $d$ ):  $\delta$  138.6 (C), 138.4 (C), 137.9 (C), 137.8 (C), 128.53 (CH), 128.51 (CH), 128.4 (CH), 128.3 (CH), 128.05 (CH), 127.99 (CH), 127.97 (CH), 127.9 (CH), 127.8 (CH), 127.7 (CH), 127.6 (CH), 95.1 (C-1), 78.5 (C-3), 76.3 (C-2), 75.1 (PhCH<sub>2</sub>), 74.5 (C-4), 73.6 (PhCH<sub>2</sub>), 73.5 (PhCH<sub>2</sub>), 73.2 (PhCH<sub>2</sub>), 72.5 (C-5), 68.1 (C-6). NMR data were consistent with literature data.<sup>18</sup>

### 2,3,4,6-Tetra-O-benzyl- $\alpha$ -D-mannopyranosyl chloride **2c**

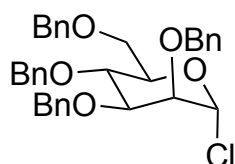

Following the general procedure A, hemiacetal **1c** (114.6 mg, 0.212 mmol) was used. After 16 h  $^1\text{H}$  NMR spectroscopy showed complete consumption of the hemiacetal to give glycosyl chloride **2c** (79% spectroscopic yield,  $\alpha/\beta \geq 95:5$ ).

$^1\text{H}$  NMR (500 MHz, Chloroform- $d$ ):  $\delta$  7.37–7.22 (m, 18H, Ph), 7.18 (dd,  $J = 7.4, 2.0$  Hz, 2H, Ph), 6.10 (d,  $J = 1.7$  Hz, 1H, H-1), 4.89 (d,  $J = 10.8$  Hz, 1H, CHHPh), 4.72 (d,  $J = 12.3$  Hz, 1H, CHHPh), 4.68 (d,  $J = 12.3$  Hz, 1H, CHHPh), 4.65 (d,  $J = 11.7$  Hz, 1H, CHHPh), 4.64 (d,  $J = 12.1$  Hz, 1H, CHHPh), 4.59 (d,  $J = 11.7$  Hz, 1H, CHHPh), 4.54 (d,  $J = 10.8$  Hz, 1H, CHHPh), 4.51 (d,  $J = 12.1$  Hz, 1H, CHHPh), 4.18 (dd,  $J = 9.4, 3.1$  Hz, 1H, H-3), 4.09 (t,  $J = 9.6$  Hz, 1H, H-4), 4.03–3.99 (m, 1H, H-5), 3.88 (dd,  $J = 2.9, 1.9$  Hz, 1H, H-2), 3.81 (dd,  $J = 11.2, 4.4$  Hz, 1H, H-6a), 3.69 (dd,  $J = 11.2, 1.7$  Hz, 1H, H-6b).  $^{13}\text{C}$  NMR (101 MHz, Chloroform- $d$ ):  $\delta$  138.3 (C), 138.18 (C), 138.17 (C), 137.7 (C), 128.6 (CH), 128.54 (CH), 128.46 (CH), 128.44 (CH), 128.1 (CH), 128.01 (CH), 127.98 (CH), 127.93 (CH), 127.92 (CH), 127.9 (CH), 127.8 (CH), 127.7 (CH), 91.7 (C-1), 78.5 (C-3), 77.9 (C-2), 75.4 (PhCH<sub>2</sub>), 74.7 (C-5), 74.2 (C-4), 73.5 (PhCH<sub>2</sub>), 73.0 (PhCH<sub>2</sub>), 72.6 (PhCH<sub>2</sub>), 68.4 (C-6). NMR data were consistent with literature data.<sup>19,20</sup>

### 3,4,6-Tri-O-benzyl-2-deoxy- $\alpha$ -D-glucopyranosyl chloride **2d**

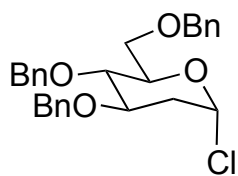

Following the general procedure A, hemiacetal **1d** (92.1 mg, 0.212 mmol) was used. After 2 h  $^1\text{H}$  NMR spectroscopy showed complete consumption of the hemiacetal to give glycosyl chloride **2d** (83% spectroscopic yield,  $\alpha/\beta \geq 95:5$ ).

$^1\text{H}$  NMR (400 MHz, Chloroform-*d*):  $\delta$  7.34–7.24 (m, 13H, Ph), 7.20–7.18 (m, 2H, Ph), 6.30 (d,  $J = 3.2$  Hz, 1H, H-1), 4.90 (d,  $J = 10.8$  Hz, 1H, CHHPh), 4.67 (s, 2H,  $2 \times$  CHHPh), 4.60 (d,  $J = 12.1$  Hz, 1H, CHHPh), 4.55 (d,  $J = 10.8$  Hz, 1H, CHHPh), 4.49 (d,  $J = 12.1$  Hz, 1H, CHHPh), 4.16 (ddd,  $J = 11.0, 9.2, 4.8$  Hz, 1H, H-3), 4.06 (br d,  $J = 9.8$  Hz, 1H, H-5), 3.81 (dd,  $J = 10.9, 3.4$  Hz, 1H, H-6a), 3.72 (t,  $J = 9.5$  Hz, 1H, H-4), 3.66 (dd,  $J = 10.8, 1.7$  Hz, 1H, H-6b), 2.51 (dd,  $J = 13.7, 4.8$  Hz, 1H, H-2eq), 2.06 (ddd,  $J = 13.9, 11.2, 3.7$  Hz, 1H, H-2ax).  $^{13}\text{C}$  NMR (101 MHz, Chloroform-*d*):  $\delta$  138.2 ( $2 \times$  C), 137.8 (C), 128.45 (CH), 128.40 (CH), 128.4 (CH), 127.9 (CH), 127.7 (CH), 92.7 (C-1), 77.3 (C-4), 76.6 (C-3), 75.1 (PhCH<sub>2</sub>), 73.9 (C-5), 73.5 (PhCH<sub>2</sub>), 72.2 (PhCH<sub>2</sub>), 68.0 (C-6), 39.6 (C-2). NMR data were consistent with literature data.<sup>21</sup>

### 3,4,6-Tri-O-benzyl-2-deoxy- $\alpha$ -D-galactopyranosyl chloride **2e**

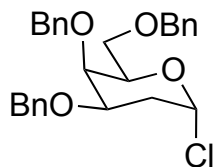

Following the general procedure A, hemiacetal **1e** (92.1 mg, 0.212 mmol) was used. After 2 h  $^1\text{H}$  NMR spectroscopy showed complete consumption of the hemiacetal to give glycosyl chloride **2e** (73% spectroscopic yield,  $\alpha/\beta \geq 95:5$ ).

$^1\text{H}$  NMR (500 MHz, Chloroform-*d*):  $\delta$  7.38–7.26 (m, 15H, Ph), 6.36 (d,  $J = 3.3$  Hz, 1H, H-1), 4.93 (d,  $J = 11.4$  Hz, 1H, CHHPh), 4.62 (s, 2H,  $2 \times$  CHHPh), 4.60 (d,  $J = 11.4$  Hz, 1H, CHHPh), 4.50 (d,  $J = 11.8$  Hz, 1H, CHHPh), 4.43 (d,  $J = 11.8$  Hz, 1H, CHHPh), 4.21 (br t,  $J = 6.5$  Hz, 1H, H-5), 4.11 (ddd,  $J = 11.7, 4.3, 2.4$  Hz, 1H, H-3), 4.00 (br s, 1H, H-4), 3.61 (dd,  $J = 9.4, 7.1$  Hz, 1H, H-6a), 3.56 (dd,  $J = 9.4, 5.9$  Hz, 1H, H-6b), 2.58 (ddd,  $J = 13.2, 11.8, 3.8$  Hz, 1H, H-2ax), 2.25 (dd,  $J = 13.2, 4.4$  Hz, 1H, H-2eq).  $^{13}\text{C}$  NMR (101 MHz, Chloroform-*d*):  $\delta$  138.6 (C), 138.1 (C), 137.9 (C), 128.6 (CH), 128.5 (CH), 128.4 (CH), 128.3 (CH), 128.0 (CH), 127.5 (CH), 94.1 (C-1,  $^1J_{\text{CH}} = 183$  Hz, from coupled HSCQ), 74.6 (PhCH<sub>2</sub>), 74.0 (C-

3), 73.5 (PhCH<sub>2</sub>), 73.0 (C-5), 72.8 (C-4), 70.8 (PhCH<sub>2</sub>), 68.5 (C-6), 35.5 (C-2). Attempts to obtain HRMS (ESI) resulted in mass spectra for the hydrolysed product **1e**.

### 3,4,6-Tri-O-acetyl-2-deoxy- $\alpha$ -D-glucopyranosyl chloride **2f**

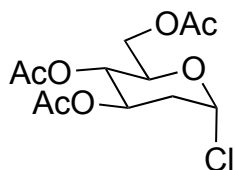

Following the general procedure A, hemiacetal **1f** (61.5 mg, 0.212 mmol) was used. After 24 h <sup>1</sup>H NMR spectroscopy showed complete consumption of the hemiacetal to give glycosyl chloride **2f** (92% spectroscopic yield,  $\alpha/\beta \geq 95:5$ ).

<sup>1</sup>H NMR (500 MHz, Chloroform-*d*):  $\delta$  6.25 (d,  $J = 3.5$  Hz, 1H, H-1), 5.49 (ddd,  $J = 11.3, 9.6, 5.2$  Hz, 1H, H-3), 5.08 (t,  $J = 9.9$  Hz, 1H, H-4), 4.35 (dd,  $J = 12.4, 4.3$  Hz, 1H, H-6a), 4.30 (ddd,  $J = 10.2, 4.2, 2.0$  Hz, 1H, H-5), 4.10 (dd,  $J = 12.4, 2.0$  Hz, 1H, H-6b), 2.54 (ddd,  $J = 13.6, 5.2, 1.2$  Hz, 1H, H-2eq), 2.20 (ddd,  $J = 13.6, 11.4, 3.9$  Hz, 1H, H-2ax), 2.09 (s, 3H, CH<sub>3</sub>), 2.07 (s, 3H, CH<sub>3</sub>), 2.03 (s, 3H, CH<sub>3</sub>). <sup>13</sup>C NMR (101 MHz, Chloroform-*d*):  $\delta$  170.7 (C=O), 170.1 (C=O), 169.8 (C=O), 90.5 (C-1), 71.0 (C-5), 68.4 (C-4), 68.2 (C-3), 61.6 (C-6), 39.0 (C-2), 21.0 (CH<sub>3</sub>), 20.81 (CH<sub>3</sub>), 20.80 (CH<sub>3</sub>). NMR data were consistent with literature data.<sup>22</sup>

### 6-O-Acetyl,3,4-di-O-benzyl-2-deoxy- $\alpha$ -D-glucopyranosyl chloride **2g**

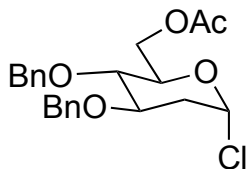

Following the general procedure A, hemiacetal **1g** (20 mg, 0.052 mmol) was used. After 8 h <sup>1</sup>H NMR spectroscopy showed complete consumption of the hemiacetal to generate glycosyl chloride **2g** (67% spectroscopic yield,  $\alpha/\beta \geq 95:5$ ).

<sup>1</sup>H NMR (500 MHz, Chloroform-*d*):  $\delta$  7.42 – 7.27 (m, 10H, Ph), 6.24 (d,  $J = 3.1$  Hz, 1H, H-1), 4.94 (d,  $J = 10.9$  Hz, 1H, CHHPh), 4.68 (s, 2H, 2 x CHHPh), 4.63 (d,  $J = 10.9$  Hz, 1H, CHHPh), 4.34 (dd,  $J = 12.2, 4.1$  Hz, 1H, H-6a), 4.30 (dd,  $J = 12.2, 2.3$  Hz, 1H, H-6b), 4.19 (ddd,  $J = 11.0, 8.9, 4.8$  Hz, 1H, H-3), 4.13 (ddd,  $J = 10.0, 3.8, 2.4$  Hz, 1H, H-5), 3.54 (dd,  $J = 10.0, 8.9$  Hz, 1H, H-4), 2.54 (ddd,  $J = 13.6, 4.8, 1.2$  Hz, 1H, H-2a), 2.10 – 2.00 (m, 1H, H-2b), 2.03 (s, 3H, CH<sub>3</sub>). <sup>13</sup>C NMR (101 MHz, Chloroform-*d*):  $\delta$  170.8 (C=O), 138.1 (C), 137.9 (C), 128.6 (CH), 128.3 (CH), 128.1 (CH), 128.0 (CH), 127.9 (CH), 92.0 (C-1, <sup>1</sup>J<sub>1CH</sub> = 185 Hz, from coupled HSQC), 76.9 (C-4), 76.8 (C-3), 75.2 (PhCH<sub>2</sub>), 72.4 (C-5), 72.2 (PhCH<sub>2</sub>),

62.7 (C-6), 39.6 (C-2), 20.9 (CH<sub>3</sub>). Attempts to obtain HRMS (ESI) resulted in mass spectra for the hydrolysed product **1g**.

**6-O-Acetyl,2,3-di-O-benzyl-4-O-tert-butyldimethylsilyl- $\alpha/\beta$ -D-galactopyranosyl chloride **2h****

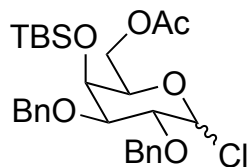

Following the general procedure A, hemiacetal **1h** (15 mg, 0.029 mmol) was used. After 2 h <sup>1</sup>H NMR spectroscopy showed complete consumption of the hemiacetal to give glycosyl chloride **2h** (90% spectroscopic yield,  $\alpha:\beta = 91:9$ ).

**$\alpha$ -Cl**

<sup>1</sup>H NMR (400 MHz, Chloroform-*d*):  $\delta$  7.40 – 7.27 (m, 10H, Ph), 6.10 (d,  $J = 3.7$  Hz, 1H, H-1), 4.82 (d,  $J = 11.4$  Hz, 1H, CHHPh), 4.75 (d,  $J = 12.0$  Hz, 1H, CHHPh), 4.71 (d,  $J = 11.4$  Hz, 1H, CHHPh), 4.70 (d,  $J = 11.9$  Hz, 1H, CHHPh), 4.17 – 4.05 (m, 5H, H-6a/b, H-5, H-4, H-2), 3.83 (dd,  $J = 9.9, 2.6$  Hz, 1H, H-3), 2.06 (s, 3H, CH<sub>3</sub>), 0.83 (s, 9H, SiC(CH<sub>3</sub>)<sub>3</sub>), 0.03 (s, 3H, SiCH<sub>3</sub>), 0.00 (s, 3H, SiCH<sub>3</sub>). <sup>13</sup>C NMR (101 MHz, Chloroform-*d*):  $\delta$  170.7 (C=O), 138.1 (C), 137.7 (C), 128.6 (CH), 128.3 (CH), 128.2 (CH), 128.11 (CH), 128.07 (CH), 127.8 (CH), 95.0 (C-1, <sup>1</sup> $J_{\text{CH}} = 183$  Hz, from coupled HSCQ), 77.0 (C-3), 75.4 (C-2), 74.0 (PhCH<sub>2</sub>), 73.1 (PhCH<sub>2</sub>), 72.5 (C-4/5), 69.8 (C-4/5), 63.2 (C-6), 26.0 (SiC(CH<sub>3</sub>)<sub>3</sub>), 20.9 (CH<sub>3</sub>), 18.6 (SiC(CH<sub>3</sub>)<sub>3</sub>), -3.8 (SiCH<sub>3</sub>), -5.0 (SiCH<sub>3</sub>).

**$\beta$ -Cl** (tentatively assigned; selected signals)

<sup>1</sup>H NMR (400 MHz, Chloroform-*d*):  $\delta$  5.17 (d,  $J = 8.2$  Hz, H-1), 4.89 (d,  $J = 10.4$  Hz, 1H, CHHPh), 3.64 (t,  $J = 6.3$  Hz, 1H), 3.38 (dd,  $J = 9.5, 2.6$  Hz, 1H); <sup>13</sup>C NMR (101 MHz, Chloroform-*d*):  $\delta$  90.9 (from HSQC);

Attempts to obtain HRMS (ESI) resulted in mass spectra for the hydrolysed product **1h**.

**2,3,4,6-Tetra-O-benzoyl- $\alpha/\beta$ -D-glucopyranosyl chloride **2i****

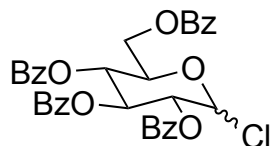

Following the general procedure A, hemiacetal **1i** (126.5 mg, 0.2120 mmol) was used. After 16 h <sup>1</sup>H NMR spectroscopy showed complete consumption of the hemiacetal to give glycosyl chloride **2i** (76% spectroscopic yield,  $\alpha:\beta = 1:3$ ).

### $\alpha/\beta$

$^1\text{H}$  NMR (500 MHz, Chloroform-*d*):  $\delta$  8.10–7.80 (m, 8H, Ph), 7.58–7.27 (m, 12H, Ph).  $^{13}\text{C}$  NMR (101 MHz, Chloroform-*d*)  $\delta$  133.9 (C), 133.7 (C), 133.5 (C), 133.4 (C), 130.2 (CH), 130.0 (CH), 129.9 (CH), 129.5 (CH), 128.8 (CH), 128.6 (CH), 128.52 (CH), 128.48 (CH).

### $\alpha\text{-Cl}$

$^1\text{H}$  NMR (500 MHz, Chloroform-*d*):  $\delta$  6.56 (d,  $J = 4.0$  Hz, 1H, H-1), 6.27 (t,  $J = 9.9$  Hz, 1H, H-3), 5.80 (t,  $J = 10.0$  Hz, 1H, H-4), 5.50 (dd,  $J = 10.0, 4.0$  Hz, 1H, H-2), 4.76 (ddd,  $J = 10.4, 4.4, 2.8$  Hz, 1H, H-5), 4.70–4.65 (m, 1H, H-6a), 4.55–4.49 (m, 1H, H-6b).  $^{13}\text{C}$  NMR (101 MHz, Chloroform-*d*)  $\delta$  166.17 (C=O), 165.73 (C=O), 165.54 (C=O), 165.22 (C=O), 90.6 (C-1,  $^1J_{\text{ICH}} = 188$  Hz, from coupled HSQC), 71.8 (C-2), 71.1 (C-5), 70.0 (C-3), 68.4 (C-4), 62.2 (C-6).

### $\beta\text{-Cl}$

$^1\text{H}$  NMR (500 MHz, Chloroform-*d*):  $\delta$  5.92–5.86 (m, 1H, H-3), 5.81 (t,  $J = 9.6$  Hz, 1H, H-4), 5.72 (t,  $J = 8.6$  Hz, 1H, H-2), 5.67 (d,  $J = 8.3$  Hz, 1H, H-1), 4.68 (dd,  $J = 12.4, 3.1$  Hz, 1H, H-6a), 4.53 (dd,  $J = 12.3, 5.1$  Hz, 1H, H-6b), 4.29 (ddd,  $J = 9.8, 5.0, 3.0$  Hz, 1H, H-5).  $^{13}\text{C}$  NMR (101 MHz, Chloroform-*d*):  $\delta$  166.21 (C=O), 165.75 (C=O), 165.15 (C=O), 164.98 (C=O), 88.1 (C-1,  $^1J_{\text{ICH}} = 174$  Hz, from coupled HSQC), 76.0 (C-5), 74.1 (C-2), 73.1 (C-3), 68.9 (C-4), 63.0 (C-6). NMR data were consistent with literature data for  $\beta\text{-Cl}$ .<sup>23</sup>

## 2,3-Di-O-benzyl-4,6-O-benzylidene- $\alpha/\beta$ -D-galactopyranosyl chloride **2j**

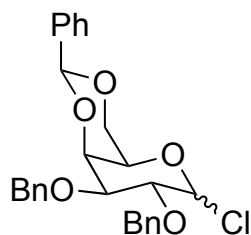

Following the general procedure A, hemiacetal **1j** (23 mg, 0.052 mmol) was used. After 7.5 h  $^1\text{H}$  NMR spectroscopy showed complete consumption of the hemiacetal to generate glycosyl chloride **2j** (77% spectroscopic yield,  $\alpha/\beta = 97:3$ ).

### $\alpha\text{-Cl}$

$^1\text{H}$  NMR (400 MHz, Chloroform-*d*):  $\delta$  7.55 – 7.27 (m, 15H, Ph), 6.23 (d,  $J = 3.7$  Hz, 1H, H-1 $\alpha$ ), 5.51 (s, 1H, H-7 $\alpha$ ), 4.84 (d,  $J = 12.2$  Hz, 1H, CHHPh), 4.83 (d,  $J = 11.7$  Hz, 1H, CHHPh), 4.75 (d,  $J = 12.2$  Hz, 1H, CHHPh), 4.72 (d,  $J = 11.6$  Hz, 1H, CHHPh), 4.27 – 4.20 (m, 3H, H-2, H-4 and H-6a), 4.08 – 4.00 (m, 2H, H-3 and H-6b), 3.95 (br s, 1H, H-5).  $^{13}\text{C}$

NMR (101 MHz, Chloroform-*d*):  $\delta$  138.5 (C), 138.0 (C), 137.6 (C), 129.1 (CH), 128.6 (CH), 128.5 (CH), 128.3 (CH), 128.0 (CH), 127.8 (CH), 126.3 (CH), 101.1 (C-7), 95.4 (C-1), 75.5 (C-3), 75.3 (C-2/4), 74.1 (C-2/4), 73.5 (PhCH<sub>2</sub>), 72.5 (PhCH<sub>2</sub>), 69.0 (C-6), 65.8 (C-5). NMR data were consistent with literature data.<sup>18,24</sup>

**$\beta$ -Cl** (selected signals)

<sup>1</sup>H NMR (400 MHz, Chloroform-*d*): 5.20 (d, *J* = 8.6 Hz, 0.3H, H-1). NMR data were consistent with literature data.<sup>24</sup>

**2,3:5,6-Di-O-isopropylidene- $\alpha/\beta$ -D-mannofuranosyl chloride 2k**

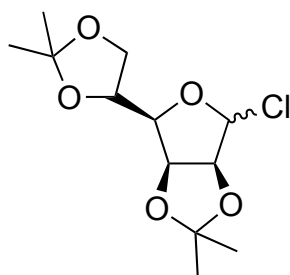

Following the general procedure A, hemiacetal **1k** (13 mg, 0.052 mmol), K<sub>2</sub>CO<sub>3</sub> (5 eq) and powdered 4Å molecular sieves were used. After 2 h <sup>1</sup>H NMR spectroscopy showed complete consumption of the hemiacetal to generate glycosyl chloride **2k** (77% spectroscopic yield,  $\alpha/\beta$  = 93:7).

**$\alpha$ -Cl**

<sup>1</sup>H NMR (500 MHz, Chloroform-*d*):  $\delta$  6.07 (s, 1H, H-1), 4.96 (d, *J* = 5.8 Hz, 1H, H-2), 4.89 (dd, *J* = 5.8, 3.6 Hz, 1H, H-3), 4.44 (ddd, *J* = 7.8, 6.3, 4.4 Hz, 1H, H-5), 4.22 (dd, *J* = 7.7, 3.5 Hz, 1H, H-4), 4.11 (dd, *J* = 8.7, 6.3 Hz, 1H, H-6a), 4.02 (dd, *J* = 8.8, 4.3 Hz, 1H, H-6b), 1.47 (s, 6H, 2 x CH<sub>3</sub>), 1.39 (s, 3H, CH<sub>3</sub>), 1.34 (s, 3H, CH<sub>3</sub>). <sup>13</sup>C NMR (126 MHz, Chloroform-*d*):  $\delta$  113.4 (O<sub>2</sub>C(CH<sub>3</sub>)<sub>2</sub>), 109.6 (O<sub>2</sub>C(CH<sub>3</sub>)<sub>2</sub>), 97.8 (C-1, <sup>1</sup>J<sub>1CH</sub> = 191 Hz, from coupled HSQC), 89.3 (C-2), 82.5 (C-4), 78.7 (C-3), 72.5 (C-5), 66.8 (C-6), 27.0 (CH<sub>3</sub>), 25.9 (CH<sub>3</sub>), 25.3 (CH<sub>3</sub>), 24.8 (CH<sub>3</sub>). NMR data were consistent with literature data.<sup>18</sup>

Selected signals for  **$\beta$ -Cl** (tentatively assigned)

<sup>1</sup>H NMR (500 MHz, Chloroform-*d*):  $\delta$  5.63 (d, *J* = 4.0 Hz, 1H, H-1), 4.79 (dd, *J* = 6.2, 4.0 Hz, 1H, CH), 3.81 (dd, *J* = 8.3, 4.4 Hz, 1H, CH), 1.62 (s, 3H, CH<sub>3</sub>), 1.45 (s, 3H, CH<sub>3</sub>), 1.41 (s, 3H, CH<sub>3</sub>). <sup>13</sup>C NMR (126 MHz, Chloroform-*d*): 92.0 (C-1, <sup>1</sup>J<sub>1CH</sub> = 180 Hz, from coupled HSQC).

### 3,4,6-Tri-O-acetyl-2-deoxy-2-phthalimido- $\alpha/\beta$ -D-glucopyranosyl chloride **2I**

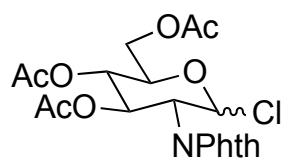

Following the general procedure A, hemiacetal **1I** (92.3 mg, 0.212 mmol) was used. After 16 h  $^1\text{H}$  NMR spectroscopy showed complete consumption of the hemiacetal to give glycosyl chloride **2I** (92% spectroscopic yield,  $\alpha/\beta = 1:2$ ).

#### $\alpha/\beta$

$^1\text{H}$  NMR (500 MHz, Chloroform-*d*):  $\delta$  7.88 (m, 2H, Ph), 7.77 (m, 2H, Ph).  $^{13}\text{C}$  NMR (101 MHz, Chloroform-*d*):  $\delta$  170.6 (C=O), 170.0 (C=O), 169.3 (C=O), 167.4 (C=O), 134.7 (CH), 131.3 (C), 124.0 (CH).

#### $\alpha$ -Cl

$^1\text{H}$  NMR (500 MHz, Chloroform-*d*):  $\delta$  6.69 (dd,  $J = 11.5, 9.1$  Hz, 1H, H-3), 6.24 (d,  $J = 3.7$  Hz, 1H, H-1), 5.14 (dd,  $J = 10.2, 9.2$  Hz, 1H, H-4), 4.77 (dd,  $J = 11.5, 3.7$  Hz, 1H, H-2), 4.48 (ddd,  $J = 10.3, 3.8, 1.9$  Hz, 1H, H-5), 4.42 (dd,  $J = 12.5, 4.0$  Hz, 1H, H-6a), 4.18 (dd,  $J = 12.5, 1.9$  Hz, 1H, H-6b), 2.12 (s, 3H, CH<sub>3</sub>), 2.08 (s, 3H, CH<sub>3</sub>), 1.90 (s, 3H, CH<sub>3</sub>).  $^{13}\text{C}$  NMR (101 MHz, Chloroform-*d*):  $\delta$  91.5 (C-1,  $^1J_{\text{ICH}} = 183$  Hz, from coupled HSQC), 70.1 (C-5), 69.2 (C-4), 66.9 (C-3), 61.3 (C-6), 55.9 (C-2), 20.83 (CH<sub>3</sub>), 20.81 (CH<sub>3</sub>), 20.78 (CH<sub>3</sub>).

#### $\beta$ -Cl

$^1\text{H}$  NMR (500 MHz, Chloroform-*d*):  $\delta$  6.20 (d,  $J = 9.3$  Hz, 1H, H-1), 5.79 (dd,  $J = 10.5, 9.2$  Hz, 1H, H-3), 5.25 (dd,  $J = 10.2, 9.3$  Hz, 1H, H-4), 4.52 (dd,  $J = 10.5, 9.4$  Hz, 1H, H-2), 4.34 (dd,  $J = 12.5, 4.7$  Hz, 1H, H-6a), 4.21 (dd,  $J = 12.5, 2.1$  Hz, 1H, H-6b), 3.99 (ddd,  $J = 10.3, 4.7, 2.2$  Hz, 1H, H-5), 2.14 (s, 3H, CH<sub>3</sub>), 2.04 (s, 3H, CH<sub>3</sub>), 1.87 (s, 3H, CH<sub>3</sub>).  $^{13}\text{C}$  NMR (101 MHz, Chloroform-*d*):  $\delta$  85.7 (C-1,  $^1J_{\text{ICH}} = 174$  Hz, from coupled HSQC), 75.8 (C-5), 70.7 (C-3), 68.3 (C-4), 61.8 (C-6), 57.6 (C-2), 20.9 (CH<sub>3</sub>), 20.7 (CH<sub>3</sub>), 20.5 (CH<sub>3</sub>). NMR data were consistent with literature data for  $\beta$ -Cl.<sup>25,26</sup>

## 2,3,4,6-Tetra-O-acetyl- $\alpha/\beta$ -D-glucopyranosyl chloride **2o**

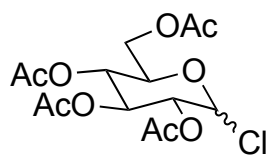

Following the general procedure B, hemiacetal **1o** (18 mg, 0.052 mmol) was used. After 1 h  $^1\text{H}$  NMR spectroscopy showed complete consumption of the hemiacetal to generate glycosyl chloride **2o** (92% spectroscopic yield,  $\alpha/\beta = 29:71$ ).

### $\alpha$ -Cl

$^1\text{H}$  NMR (500 MHz, Chloroform-*d*):  $\delta$  6.30 (d,  $J = 4.0$  Hz, 1H, H-1), 5.56 (t,  $J = 9.8$  Hz, 1H, H-3), 5.16 – 5.11 (m, 1H, H-4), 5.02 (dd,  $J = 10.1, 4.0$  Hz, 1H, H-2), 4.36 – 4.29 (m, 2H, H-5 and H-6a), 4.16 – 4.11 (m, 1H, H-6b), 2.104 (s, 3H, CH<sub>3</sub>), 2.101 (s, 3H, CH<sub>3</sub>), 2.05 (s, 3H, CH<sub>3</sub>), 2.04 (s, 3H, CH<sub>3</sub>).  $^{13}\text{C}$  NMR (101 MHz, Chloroform-*d*):  $\delta$  170.60 (C=O), 169.9 (C=O), 169.5 (C=O), 90.2 (C-1), 70.8 (C-2), 70.5 (C-5), 69.5 (C-3), 67.5 (C-4), 61.2 (C-6), 20.8 (br, CH<sub>3</sub>). NMR data were consistent with literature data.<sup>18,27</sup>

### $\beta$ -Cl

$^1\text{H}$  NMR (500 MHz, Chloroform-*d*):  $\delta$  5.32 (d,  $J = 8.2$  Hz, 1H, H-1), 5.23 – 5.15 (m, 3H, H-2, H-3 and H-4), 4.27 (dd,  $J = 12.5, 4.8$  Hz, 1H, H-6a), 4.17 (dd,  $J = 12.5, 2.3$  Hz, 1H, H-6b), 3.83 (ddd,  $J = 9.6, 4.7, 2.2$  Hz, 1H, H-5), 2.11 (s, 3H, CH<sub>3</sub>), 2.09 (s, 3H, CH<sub>3</sub>), 2.04 (s, 3H, CH<sub>3</sub>), 2.02 (s, 3H, CH<sub>3</sub>).  $^{13}\text{C}$  NMR (101 MHz, Chloroform-*d*):  $\delta$  170.66 (C=O), 170.1 (C=O), 169.3 (C=O), 169.1 (C=O), 87.7 (C-1), 75.6 (C-5), 73.5 (C-2/3), 72.9 (C-2/3), 67.7 (C-4), 61.7 (C-6), 20.8, 20.6 (br, CH<sub>3</sub>). NMR data were consistent with literature data.<sup>28</sup>

## 2,3,4,6-Tetra-O-acetyl- $\alpha/\beta$ -D-mannopyranosyl chloride **2p**

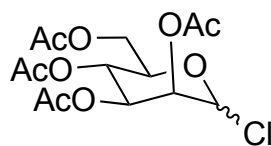

Following the general procedure B, hemiacetal **1p** (18 mg, 0.052 mmol) was used. After 1 h  $^1\text{H}$  NMR spectroscopy showed complete consumption of the hemiacetal to generate glycosyl chloride **2p** (71% spectroscopic yield,  $\alpha/\beta = 83:17$ ).

### $\alpha$ -Cl

$^1\text{H}$  NMR (500 MHz, Chloroform-*d*):  $\delta$  6.00 (d,  $J = 1.6$  Hz, 1H, H-1), 5.61 (dd,  $J = 10.2, 3.4$  Hz, 1H, H-3), 5.39 (dd,  $J = 3.4, 1.7$  Hz, 1H, H-2), 5.36 (t,  $J = 10.1$  Hz, 1H, H-4), 4.32 (dd,  $J = 12.2, 5.0$  Hz, 1H, H-6a), 4.30 – 4.25 (m, 1H, H-5), 4.15 (dd,  $J = 12.2, 2.0$  Hz, 1H, H-6b),

2.18 (s, 3H, CH<sub>3</sub>), 2.11 (s, 3H, CH<sub>3</sub>), 2.07 (s, 3H, CH<sub>3</sub>), 2.01 (s, 3H, CH<sub>3</sub>). <sup>13</sup>C NMR (101 MHz, Chloroform-*d*): δ 170.6, 169.8, 169.71, 169.65 (4 x C=O), 88.9 (C-1), 71.6 (C-2), 71.4 (C-5), 67.8 (C-3), 65.4 (C-4), 61.7 (C-6), 20.9 (CH<sub>3</sub>), 20.8 (CH<sub>3</sub>), 20.74 (CH<sub>3</sub>), 20.68 (CH<sub>3</sub>). NMR data were consistent with literature data.<sup>18,27</sup>

### β-Cl

<sup>1</sup>H NMR (500 MHz, Chloroform-*d*): δ 5.54 (d, *J* = 1.1 Hz, 1H, H-1), 5.51 (dd, *J* = 3.4, 1.2 Hz, 1H, H-2), 5.28 (t, *J* = 10.0 Hz, 1H, H-4), 5.11 (dd, *J* = 10.0, 3.3 Hz, 1H, H-3), 4.30 – 4.25 (m, 1H, H-6a), 4.18 (dd, *J* = 12.4, 2.5 Hz, 1H, H-6b), 3.80 (ddd, *J* = 9.9, 5.7, 2.5 Hz, 1H, H-5), 2.24 (s, 3H, CH<sub>3</sub>), 2.11 (s, 3H, CH<sub>3</sub>), 2.06 (s, 3H, CH<sub>3</sub>), 2.01 (s, 3H, CH<sub>3</sub>). <sup>13</sup>C NMR (101 MHz, Chloroform-*d*) selected peaks: δ 85.8 (C-1), 76.3 (C-5), 71.1 (C-2), 70.3 (C-3), 65.1 (C-4), 62.3 (C-6). NMR data were consistent with literature data.<sup>29</sup>

### 4,6-O-Diacetyl-2,3-di-O-*tert*-butyldimethylsilyl-α-D-glucopyranosyl chloride 2q

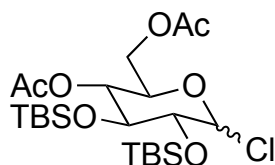

Following the general procedure C, hemiacetal **1q** (15 mg, 0.030 mmol) was used. After 4 h <sup>1</sup>H NMR spectroscopy showed complete consumption of the hemiacetal to give glycosyl chloride **2q** (90% spectroscopic yield, α:β = 1:1).

### α/β

<sup>1</sup>H NMR (500 MHz, Chloroform-*d*): 2.09, 2.09, 2.08, 2.07 (s x 4, 12H, CH<sub>3</sub>), 0.94, 0.901, 0.897, 0.85 (s x 4, 36H, SiC(CH<sub>3</sub>)<sub>3</sub>), 0.135, 0.125, 0.121, 0.118, 0.111, 0.10, 0.09 (s x 7, 24H, SiCH<sub>3</sub>). <sup>13</sup>C NMR (126 MHz, Chloroform-*d*): δ 26.2, 25.9, 25.8, 25.7 (4 x SiC(CH<sub>3</sub>)<sub>3</sub>), 21.3, 21.2, 20.92, 20.88 (4 x CH<sub>3</sub>), 18.3, 18.0, 17.9 (3 x SiC(CH<sub>3</sub>)<sub>3</sub>), -3.0, -3.4, -4.1, -4.27, -4.32, -4.38, -4.42, -4.6 (8 x SiCH<sub>3</sub>).

### α-Cl

<sup>1</sup>H NMR (500 MHz, Chloroform-*d*): δ 5.98 (d, *J* = 3.6 Hz, 1H, H-1), 4.96 (dd, *J* = 10.1, 8.9 Hz, 1H, H-4), 4.23 – 4.15 (m, 2H, H-6a, H-5), 4.06 – 4.01 (m, 2H, H-3, H-6b), 3.80 (dd, *J* = 8.8, 3.6 Hz, 1H, H-2). <sup>13</sup>C NMR (126 MHz, Chloroform-*d*): δ 170.80 (C=O), 169.6 (C=O), 95.5 (C-1, <sup>1</sup>*J*<sub>1CH</sub> = 182 Hz, from coupled HSCQ), 74.1 (C-2), 71.6 (C-3), 71.1 (C-5), 70.2 (C-4), 63.2 (C-6).

Attempts to obtain HRMS (ESI) resulted in mass spectra for the hydrolysed product **1q**.

### $\beta$ -Cl

$^1\text{H}$  NMR (500 MHz, Chloroform-*d*):  $\delta$  5.71 (dd,  $J$  = 2.8, 0.9 Hz, 1H, H-1), 5.18 (dd,  $J$  = 6.6, 5.6 Hz, 1H, H-4), 4.39 (dd,  $J$  = 11.9, 6.1 Hz, 1H, H-6a), 4.30 (dd,  $J$  = 11.9, 4.6 Hz, 1H, H-6b), 4.09 (td,  $J$  = 6.3, 4.6 Hz, 1H, H-5), 3.93 (t,  $J$  = 2.8 Hz, 1H, H-2), 3.86 (ddd,  $J$  = 5.5, 2.8, 0.9 Hz, 1H, H-3).  $^{13}\text{C}$  NMR (126 MHz, Chloroform-*d*):  $\delta$  170.77 (C=O), 169.8 (C=O), 90.9 (C-1,  $^1J_{\text{CH}}$  = 182 Hz, from coupled HSCQ), 76.5 (C-2), 73.9 (C-5), 73.2 (C-3), 69.6 (C-4), 62.0 (C-6). W-coupling is noted between H-1 and H-3; NOESY from H-1 shows strong correlation to H-2 and weak correlation to H-3 & H-5; combined data suggest a distorted conformation is adopted by the  $\beta$ -Cl.

### 3,6-O-Diacetyl-2,4-di-O-*tert*-butyldimethylsilyl- $\alpha/\beta$ -D-glucopyranosyl chloride **2r**

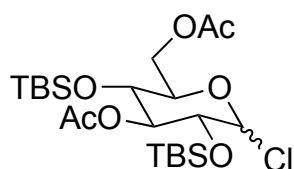

Following the general procedure C, hemiacetal **1r** (16 mg, 0.032 mmol) was used. After 6 h,  $^1\text{H}$  NMR spectroscopy showed complete consumption of the hemiacetal to give glycosyl chloride **2r** (87% spectroscopic yield,  $\alpha/\beta$  = 88:12).

### $\alpha/\beta$

$^1\text{H}$  NMR (500 MHz, Chloroform-*d*):  $\delta$  2.10, 2.09 (s x 2, 6H, CH<sub>3</sub>), 0.08, 0.06, 0.05, 0.04 (s x 4, 12H, SiCH<sub>3</sub>).

### $\alpha$ -Cl

$^1\text{H}$  NMR (500 MHz, Chloroform-*d*):  $\delta$  5.92 (d,  $J$  = 3.9 Hz, 1H, H-1), 5.33 (t,  $J$  = 9.3 Hz, 1H, H-3), 4.42 – 4.35 (m, 1H, H-6a), 4.17 – 4.10 (m, 2H, H-6b, H-4/5), 3.78 (dd,  $J$  = 9.4, 4.0 Hz, 1H, H-2), 3.78 – 3.74 (m, 1H, H-4/5), 0.87 (s, 9H, SiC(CH<sub>3</sub>)<sub>3</sub>), 0.85 (s, 9H, SiC(CH<sub>3</sub>)<sub>3</sub>).  $^{13}\text{C}$  NMR (126 MHz, Chloroform-*d*):  $\delta$  170.6 (C=O), 169.3 (C=O), 94.5 (C-1,  $^1J_{\text{CH}}$  = 182 Hz, from coupled HSCQ), 74.6 (C-3), 72.9 (C-4/5), 71.8 (C-2), 68.4 (C-4/5), 62.4 (C-6), 25.7 (SiC(CH<sub>3</sub>)<sub>3</sub>), 25.4 (SiC(CH<sub>3</sub>)<sub>3</sub>), 21.8 (CH<sub>3</sub>), 20.9 (CH<sub>3</sub>), 18.0 (SiC(CH<sub>3</sub>)<sub>3</sub>), 17.8 (SiC(CH<sub>3</sub>)<sub>3</sub>), -3.9, -4.4, -4.87, -4.90 (4 x SiCH<sub>3</sub>).

### $\beta$ -Cl

$^1\text{H}$  NMR (500 MHz, Chloroform-*d*):  $\delta$  5.20 (d,  $J$  = 7.4 Hz, 1H, H-1), 4.99 (dd,  $J$  = 8.7, 8.0 Hz, 1H, H-3), 4.43 (dd,  $J$  = 12.1, 2.3 Hz, 1H, H-6a), 4.02 (dd,  $J$  = 12.1, 5.0 Hz, 1H, H-6b), 3.84 (dd,  $J$  = 9.6, 8.7 Hz, 1H, H-4), 3.70 (t,  $J$  = 7.6 Hz, 1H, H-2), 3.63 (ddd,  $J$  = 9.6, 5.0, 2.2

Hz, 1H, H-5).  $^{13}\text{C}$  NMR (126 MHz, Chloroform-*d*) selected peaks:  $\delta$  91.5 (C-1,  $^1J_{\text{CH}} = 175$  Hz, from coupled HSCQ), 78.1 (C-3), 77.4 (C-5), 75.8 (C-2), 68.7 (C-4), 62.7 (C-6).

Attempts to obtain HRMS (ESI) resulted in mass spectra for the hydrolysed product **1r**.

### 3,4,6-Tri-*O*-*tert*-butyldimethylsilyl-2-deoxy- $\alpha$ -D-galactopyranosyl chloride **2s**

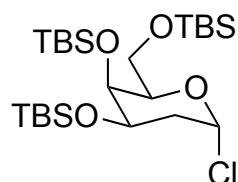

Following the general procedure for uncatalysed reactions, hemiacetal **1s** (26 mg, 0.052 mmol) was used. After 8 h  $^1\text{H}$  NMR spectroscopy showed complete consumption of the hemiacetal to generate glycosyl chloride **2s** (90% spectroscopic yield,  $\alpha/\beta \geq 95:5$ ).

$^1\text{H}$  NMR (500 MHz, Chloroform-*d*):  $\delta$  6.32 (d,  $J = 3.3$  Hz, 1H, H-1), 4.24 (ddd,  $J = 11.4$ , 4.1, 2.3 Hz, 1H, H-3), 3.95 (br s, 1H, H-4), 3.92 (t,  $J = 6.8$  Hz, 1H, H-5), 3.72 (dd,  $J = 10.1$ , 7.5 Hz, 1H, H-6a), 3.63 (dd,  $J = 10.1$ , 6.1 Hz, 1H, H-6b), 2.47 (ddd,  $J = 13.1$ , 11.6, 3.7 Hz, 1H, H-2<sub>ax</sub>), 1.93 (ddt,  $J = 13.2$ , 4.3, 1.3 Hz, 1H, H-2<sub>eq</sub>), 0.92, 0.90, 0.89 (s x 3, 27 H,  $\text{SiC}(\text{CH}_3)_3$ ), 0.118 (s, 3H,  $\text{SiCH}_3$ ), 0.116 (s, 3H,  $\text{SiCH}_3$ ), 0.11, 0.10, 0.07, 0.06 (s x 4, 12H,  $\text{SiCH}_3$ ).  $^{13}\text{C}$  NMR (126 MHz, Chloroform-*d*):  $\delta$  95.1 (C-1,  $^1J_{\text{CH}} = 185$  Hz, from coupled HSQC), 75.7 (C-5), 69.7 (C-4), 68.0 (C-3), 61.5 (C-6), 37.9 (C-2), 26.3 ( $\text{SiC}(\text{CH}_3)_3$ ), 26.2 ( $\text{SiC}(\text{CH}_3)_3$ ), 26.0 ( $\text{SiC}(\text{CH}_3)_3$ ), 18.7 ( $\text{SiC}(\text{CH}_3)_3$ ), 18.6 ( $\text{SiC}(\text{CH}_3)_3$ ), 18.3 ( $\text{SiC}(\text{CH}_3)_3$ ), -3.8 ( $\text{SiCH}_3$ ), -4.3 ( $\text{SiCH}_3$ ), -4.6 ( $\text{SiCH}_3$ ), -4.9 ( $\text{SiCH}_3$ ), -5.1 ( $\text{SiCH}_3$ ), -5.2 ( $\text{SiCH}_3$ ). Attempts to obtain HRMS (ESI) resulted in mass spectra for the hydrolysed product **1s**.

### 1,3-Bis[3,5-bis(trifluoromethyl)phenyl]urea **8**

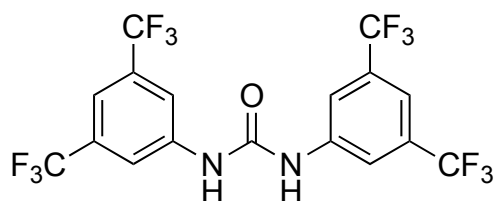

Following the literature procedure,<sup>30</sup> a flame-dried 25 mL Schlenk flask was placed under three cycles of vacuum and nitrogen, and then was charged with 3,5-bis(trifluoromethyl)aniline (0.341 mL, 2.18 mmol) and anhydrous THF (10 mL). 3,5-Bis(trifluoromethyl)phenyl isocyanate (0.452 mL, 2.62 mmol) was added to the solution and the reaction mixture was left to stir at room temperature for 48 h. The reaction mixture was concentrated *in vacuo* and the crude solid obtained was washed with cold DCM (3 x 10 mL) to give 1,3-bis[3,5-bis(trifluoromethyl)phenyl]urea **8** as a white solid (0.962 g, 91% yield).

$^1\text{H}$  NMR (300 MHz, Methanol- $d_4$ ):  $\delta$  8.10 (s, 4H), 7.56 (s, 2H).  $^{19}\text{F}$  NMR (282 MHz, Methanol- $d_4$ ):  $\delta$  -64.67.  $^{13}\text{C}$  NMR (101 MHz, Methanol- $d_4$ ):  $\delta$  154.1, 142.5, 133.3 (q,  $J$  = 33.2 Hz), 124.8 (q,  $J$  = 271.8 Hz), 119.9–119.5 (m), 116.5 (hept,  $J$  = 3.2 Hz). NMR data were consistent with literature data.<sup>30</sup>

## One-Pot Glycosylation Using Urea Catalyst

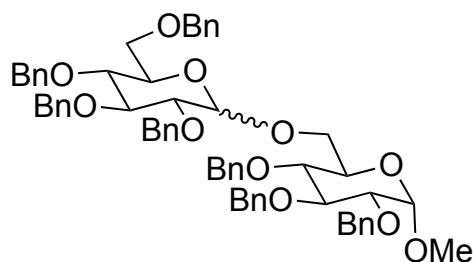

A 25 mL reaction tube charged with a stir-bar, hemiacetal **1a** (54.1 mg, 0.1000 mmol) and triphenylphosphine oxide (1.4 mg, 5.0  $\mu\text{mol}$ ) was placed under three cycles of vacuum and nitrogen. The solids were dissolved in anhydrous DCM (0.23 M), treated with oxalyl chloride (13  $\mu\text{L}$ , 0.15 mmol) and left to stir at room temperature. After 2 h, the solvent and excess oxalyl chloride were removed by applying vacuum. Following the literature procedure,<sup>30</sup> acceptor **6** (23.2 mg, 0.0499 mmol), urea catalyst **8** (4.8 mg, 9.9  $\mu\text{mol}$ ), tris(trimethoxyphenyl)phosphine **7** (106.5 mg, 0.200 mmol) and  $\text{K}_2\text{CO}_3$  (22 mg, 0.16 mmol) were added to the reaction tube and placed under three cycles of vacuum and nitrogen. The contents were dissolved in anhydrous DCE (0.5 mL) and stirred at reflux for 12 h. At that point most of the solvent had evaporated from the reaction mixture; additional anhydrous DCE (0.5 mL) was added and the reaction mixture was stirred at reflux for another 12 h. The reaction mixture was purified by column chromatography ( $R_f$  = 0.23, pentane/ethyl acetate; 4:1) to give the product **9** as a white solid. (35.2 mg, 71% yield,  $\alpha/\beta$  = 88:12).

$^1\text{H}$  NMR (400 MHz, Chloroform- $d$ ):  $\delta$  7.39–7.18 (m, 33H), 7.16–7.08 (m, 2H), 4.98 (d,  $J$  = 3.5 Hz, 1H, H-1), 4.96 (d,  $J$  = 10.6 Hz, 1H, CHHPh), 4.93 (d,  $J$  = 9.7 Hz, 1H, CHHPh), 4.91 (d,  $J$  = 10.4 Hz, 1H, CHHPh), 4.82 (d,  $J$  = 11.0 Hz, 1H, CHHPh), 4.80 (d,  $J$  = 10.8 Hz, 1H, CHHPh), 4.77 (d,  $J$  = 10.9 Hz, 1H, CHHPh), 4.70 (d,  $J$  = 12.1 Hz, 1H, CHHPh), 4.66 (s, 2H, 2  $\times$  CHHPh), 4.64 (d,  $J$  = 11.3 Hz, 1H, CHHPh), 4.57 (d,  $J$  = 12.0 Hz, 2H, 2  $\times$  CHHPh), 4.55 (d,  $J$  = 3.2 Hz, 1H, H-1'), 4.45 (d,  $J$  = 11.0 Hz, 1H, CHHPh), 4.41 (d,  $J$  = 12.1 Hz, 1H, CHHPh), 3.99 (d,  $J$  = 9.5 Hz, 1H, H-3'), 3.94 (d,  $J$  = 9.5 Hz, 1H, H-3), 3.85–3.74 (m, 3H, H-6a', H-5, H-5'), 3.71 (d,  $J$  = 11.1 Hz, 1H, H-6b'), 3.68–3.59 (m, 3H, H-6a, H-4, H-4'), 3.57–3.53 (m, 1H, H-6b), 3.53 (dd,  $J$  = 9.5, 3.6 Hz, 1H, H-2), 3.44 (dd,  $J$  = 9.6, 3.6 Hz, 1H, H-2'),

3.35 (s, 3H, OCH<sub>3</sub>). <sup>13</sup>C NMR (101 MHz, Chloroform-*d*): δ 138.96 (C), 138.95 (C), 138.61 (C), 138.58 (C), 138.56 (C), 138.3 (C), 138.1 (C), 128.54 (CH), 128.46 (CH), 128.44 (CH), 128.41 (CH), 128.14 (CH), 128.14 (CH), 128.11 (CH), 128.01 (CH), 127.97 (CH), 127.87 (CH), 127.84 (CH), 127.77 (CH), 127.75 (CH), 127.71 (CH), 127.68 (CH), 127.66 (CH), 127.63 (CH), 98.1 (C-1'), 97.4 (C-1), 82.3 (C-3'), 81.8 (C-3), 80.3 (C-2'), 80.1 (C-2), 77.9 (C-4/4'), 77.8 (C-4/4'), 75.85 (PhCH<sub>2</sub>), 75.6 (PhCH<sub>2</sub>), 75.1 (PhCH<sub>2</sub>), 75.0 (PhCH<sub>2</sub>), 73.55 (PhCH<sub>2</sub>), 73.51 (PhCH<sub>2</sub>), 72.5 (PhCH<sub>2</sub>), 70.5 (C-5'), 70.4 (C-5), 68.6 (C-6), 66.2 (C-6'), 55.3 (OCH<sub>3</sub>). NMR data was consistent with literature data.<sup>31</sup>

## Mechanistic Studies (alkoxyphosphonium salt **5b**)

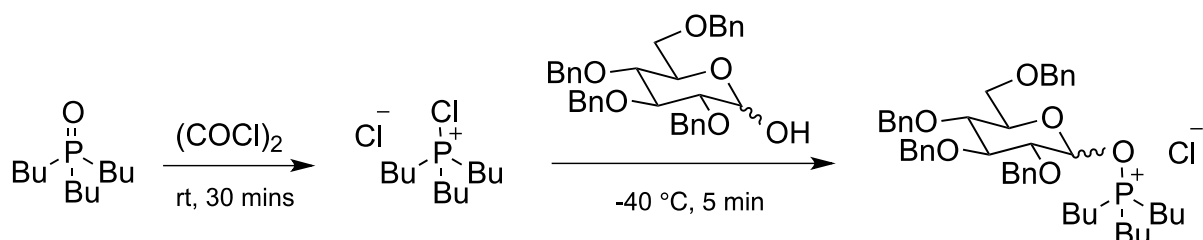

A 25 mL Schlenk flask was charged with tributylphosphine oxide (40.5 mg, 0.185 mmol) and a magnetic stirbar. Under a nitrogen atmosphere, the flask was heated with a heat gun until the phosphine oxide melted and was then evacuated for 15 minutes. This was repeated another two times. A solution of the phosphine oxide in dry CDCl<sub>3</sub> (3.7 mL) was then treated with oxalyl chloride (23.7 µl, 0.277 mmol) and was left to stir at room temperature for 1 h. The reaction mixture was cooled to -40 °C and hemiacetal **1a** (100 mg, 0.185 mmol) was added to the reaction flask. The contents were stirred for 5 mins and an aliquot (0.6 mL) of the reaction mixture was quickly transferred to an NMR tube under nitrogen in a deep Schenk tube at -40 °C. The tube was capped under a positive flow of nitrogen and sealed with Teflon tape. Subsequent NMR experiments were carried out at -10 °C. Hemiacetal **1a**, a small amount of glycosyl chloride **2a**, chlorophosphonium salt **4b** and a small amount of protonated phosphine oxide were present in addition to a species assigned as alkoxyphosphonium salt **5b**. Selected signals attributed to **5b**: <sup>1</sup>H NMR (600 MHz, Chloroform-*d*): δ 5.33 (dd, *J* = 7.2, 7.1 Hz 1H, H-1), 3.87 (br d, *J* = 9.7 Hz, 1H, H4/5), 3.80 (app t, *J* = 9.0 Hz, 1H, H-3), 3.52 (app t, *J* = 8.3 Hz, 1H, H-2), 2.56 (dt, *J* = 20.3, 10.6 Hz, 6H, CH<sub>2</sub>), 1.47–1.41 (m, 6H, CH<sub>2</sub>), 0.90 (t, *J* = 7.1 Hz, 9H, CH<sub>3</sub>). HSQC NMR (600 × 151 MHz, Chloroform-*d*): cross peak at 5.33 (<sup>1</sup>H), 100.0 (C-1, <sup>1</sup>*J*<sub>CH</sub> = 170 Hz, from coupled HSQC). <sup>31</sup>P NMR (243 MHz, Chloroform-*d*): δ 102.4.

## Anomerisation Tests

Following the general procedure, hemiacetal **1a** (125 mg, 0.231 mmol) was used and tributylphosphine oxide (1 eq.) was used in place of triphenylphosphine oxide. After 1 h the  $^1\text{H}$  NMR spectrum showed complete consumption of the hemiacetal ( $\alpha/\beta$ -glycosyl chloride **2a** = 75:25). After a short quick column ( $R_f$  = 0.9, cyclohexane/ethyl acetate; 1:2) the pure glucosyl chloride **2a** was obtained as a cloudy white syrup (111 mg, 86% yield,  $\alpha/\beta$  = 87:13). A stock solution of **2a** in anhydrous DCM (0.23 M) was prepared and divided into three reactions **A**, **B** and **C**. Reaction **A** was used as a control, to reaction **B** was added triphenyl phosphine oxide (5 mol%) and to reaction **C** was added triphenyl phosphine oxide (5 mol%) and a drop of conc HCl. At intervals of 1 h, an aliquot was taken from each reaction, solvent was removed and  $^1\text{H}$  NMR experiments were carried out. There was no significant change in  $\alpha/\beta$  ratio over time under these conditions (Table 1).

### Anomerisation Test with chlorophosphonium salt/(COCl) $_2$

Following the procedure above the pure glycosyl chloride **2a** was obtained as a cloudy white syrup ( $\alpha/\beta$  = 89.5:10.5). A 25 mL crimp-top vial charged with a stir-bar, pure glycosyl chloride **2a** and triphenylphosphine oxide (5 mol%) was placed under three cycles of vacuum and nitrogen. The solids were dissolved in anhydrous DCM (0.23 M), treated with oxalyl chloride (1.5 eq) and left to stir at room temperature. At intervals of 1 h, an aliquot was taken from the reaction, solvent was removed under inert atmosphere and  $^1\text{H}$  NMR experiments were carried out using anhydrous CDCl $_3$ . There was no significant change in  $\alpha/\beta$  ratio over time under these conditions (Table 2).

**Table 1. Anomerisation Test**

| Entry | Time<br>h | A<br>Control<br>$\alpha/\beta$ | B<br>Ph $_3$ PO<br>$\alpha/\beta$ | C<br>Ph $_3$ PO, conc HCl<br>$\alpha/\beta$ |
|-------|-----------|--------------------------------|-----------------------------------|---------------------------------------------|
| 1     | 0.2       | 87:13                          | 87:13                             | 87:13                                       |
| 2     | 1         | 87:13                          | 87:13                             | 87:13                                       |
| 3     | 2         | 87:13                          | 87:13                             | 87:13                                       |
| 4     | 3         | 87:13                          | 87:13                             | 87:13                                       |
| 5     | 3.5       | 87:13                          | 87:13                             | 88:12                                       |

**Table 1. Anomerisation Test under CPS, (COCl)<sub>2</sub> conditions**

| Entry | Time<br>h | CPS, (COCl) <sub>2</sub><br>α/β |
|-------|-----------|---------------------------------|
| 1     | 1         | 90:10                           |
| 2     | 2         | 90:10                           |
| 3     | 4         | 90:10                           |

## References

- 1 A. B. Pangborn, M. A. Giardello, R. H. Grubbs, R. K. Rosen and F. J. Timmers, *Organometallics*, 1996, **15**, 1518–1520.
- 2 G. J. L. Bernardes, E. J. Grayson, S. Thompson, J. M. Chalker, J. C. Errey, F. El Oualid, T. D. W. Claridge and B. G. Davis, *Angew. Chem. Int. Ed.*, 2008, **47**, 2244–2247.
- 3 S. M. Andersen, M. Heuckendorff and H. H. Jensen, *Org. Lett.*, 2015, **17**, 944–947.
- 4 Q. Wang, G. Liu, S. Gong and Q. Sun, *Adv. Mater. Res.*, 2014, **830**, 155–158.
- 5 R. Wild and R. R. Schmidt, *Liebigs Ann.*, 1995, 755–764.
- 6 S. Sabesan and S. Neira, *J. Org. Chem.*, 1991, **56**, 5468–5472.
- 7 C. W. Chang, S. S. Chang, C. S. Chao and K. K. T. Mong, *Tetrahedron Lett.*, 2009, **50**, 4536–4540.
- 8 K. K. Somarathne, J. A. J. McCone, A. Brackovic, J. L. P. Rivera, J. R. Fulton, E. Russell, J. J. Field, C. L. Orme, H. L. Stirrat, J. Riesterer, P. H. Teesdale-Spittle, J. H. Miller and J. E. Harvey, *Chem. Asian J.*, 2019, **14**, 1230–1237.
- 9 C. R. Shie, Z. H. Tzeng, S. S. Kulkarni, B. J. Uang, C. Y. Hsu and S. C. Hung, *Angew. Chem. Int. Ed.*, 2005, **44**, 1665–1668.
- 10 N. Aiguabella, M. C. Holland and R. Gilmour, *Org. Biomol. Chem.*, 2016, **14**, 5534–5538.
- 11 P. J. Garegg, I. Kvarnström, A. Niklasson and S. C. T. Svensson, *J. Carbohydr. Chem.*, 1993, **12**, 933–953.
- 12 A. S. Bhat and J. Gervay-hague, *Org. Lett.*, 2001, **3**, 2081–2084.
- 13 T. Halmos, R. Montserret, J. Filippi and K. Antonakis, *Carbohydr. Res.*, 1987, **170**, 57–69.
- 14 M. Vangala and S. Hotha, *J. Carbohydr. Chem.*, 2018, **0**, 1–21.
- 15 E. I. Balmond, D. Benito-Alifonso, D. M. Coe, R. W. Alder, E. M. McGarrigle and M. C. Galan, *Angew. Chem. Int. Ed.*, 2014, **53**, 8190–8194.
- 16 R. M. Cicchillo and P. Norris, *Carbohydr. Res.*, 2000, **328**, 431–434.
- 17 A. V. Nikolaev and N. K. Kochetkov, *Bull. Acad. Sci. USSR Div. Chem. Sci.*, 1986, **35**, 2342–2350.
- 18 C. W. Chang, S. S. Chang, C. S. Chao and K. K. T. Mong, *Tetrahedron Lett.*, 2009, **50**, 4536–4540.
- 19 A. M. Gómez, A. Pedregosa, M. Casillas, C. Uriel and J. C. López, *Eur. J. Org. Chem.*, 2009, 3579–3588.
- 20 H. Ardrón, T. D. Butters, F. M. Platt, M. R. Wormald, R. A. Dwek, G. W. J. Fleet and G. S. Jacob, *Tetrahedron: Asymmetry*, 1993, **4**, 2011–2024.
- 21 V. P. Verma and C. C. Wang, *Chem. Eur. J.*, 2013, **19**, 846–851.
- 22 T. M. Beale, P. J. Moon and M. S. Taylor, *Org. Lett.*, 2014, **16**, 3604–3607.

- 23 L. Encinas and J. L. Chiara, *J. Comb. Chem.*, 2008, **10**, 361–363.
- 24 S. Sugiyama and J. M. Diakur, *Org. Lett.*, 2000, **2**, 2713–2715.
- 25 K. Jansson, G. Noori and G. Magnusson, *J. Org. Chem.*, 1990, **55**, 3181–3185.
- 26 Z. Cao, W. Liu, Y. Qu, G. Yao, D. Gao and W. Liu, *J. Chem. Res.*, 2013, **37**, 467–469.
- 27 J. L. Montero, J. Y. Winum, A. Leydet, M. Kamal, A. A. Pavia and J. P. Roque, *Carbohydr. Res.*, 1997, **297**, 175–180.
- 28 F. M. Ibatullin and S. I. Selivanov, *Tetrahedron Lett.*, 2002, **43**, 9577–9580.
- 29 M. Blanc-Muesser, J. Defaye and H. Driguez, *Carbohydr. Res.*, 1978, **67**, 305–328.
- 30 L. Sun, X. Wu, D. C. Xiong and X. S. Ye, *Angew. Chem. Int. Ed.*, 2016, **55**, 8041–8044.
- 31 R. Iwata, K. Uda, D. Takahashi and K. Toshima, *Chem. Commun.*, 2014, **50**, 10695–10698.

# NMR Spectra

<sup>1</sup>H NMR (500 MHz, Chloroform-*d*) **1g**

F-B100-P\_PROTON\_20181010\_01  
F-B100-P

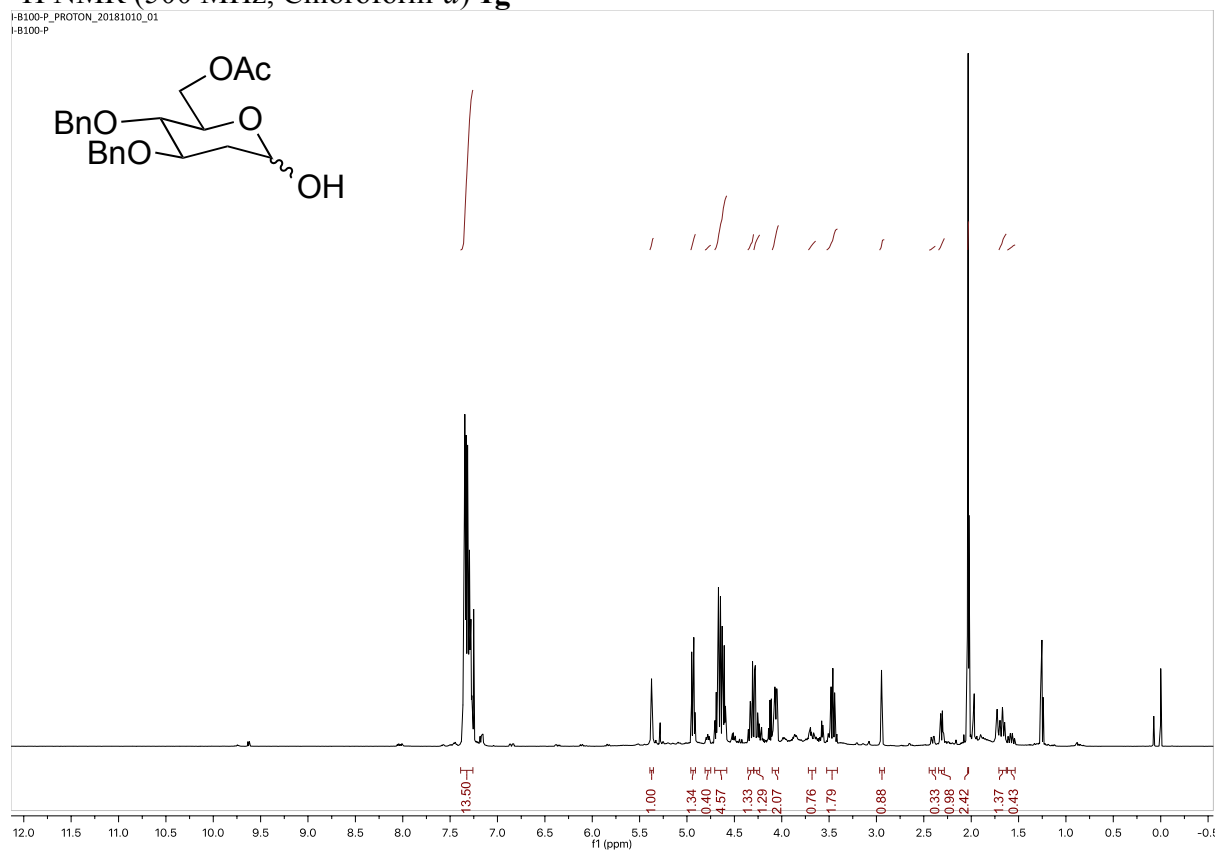

<sup>13</sup>C NMR (101 MHz, Chloroform-*d*) **1g**

F-B100-P\_CARBON\_20181011\_01  
F-B100-P

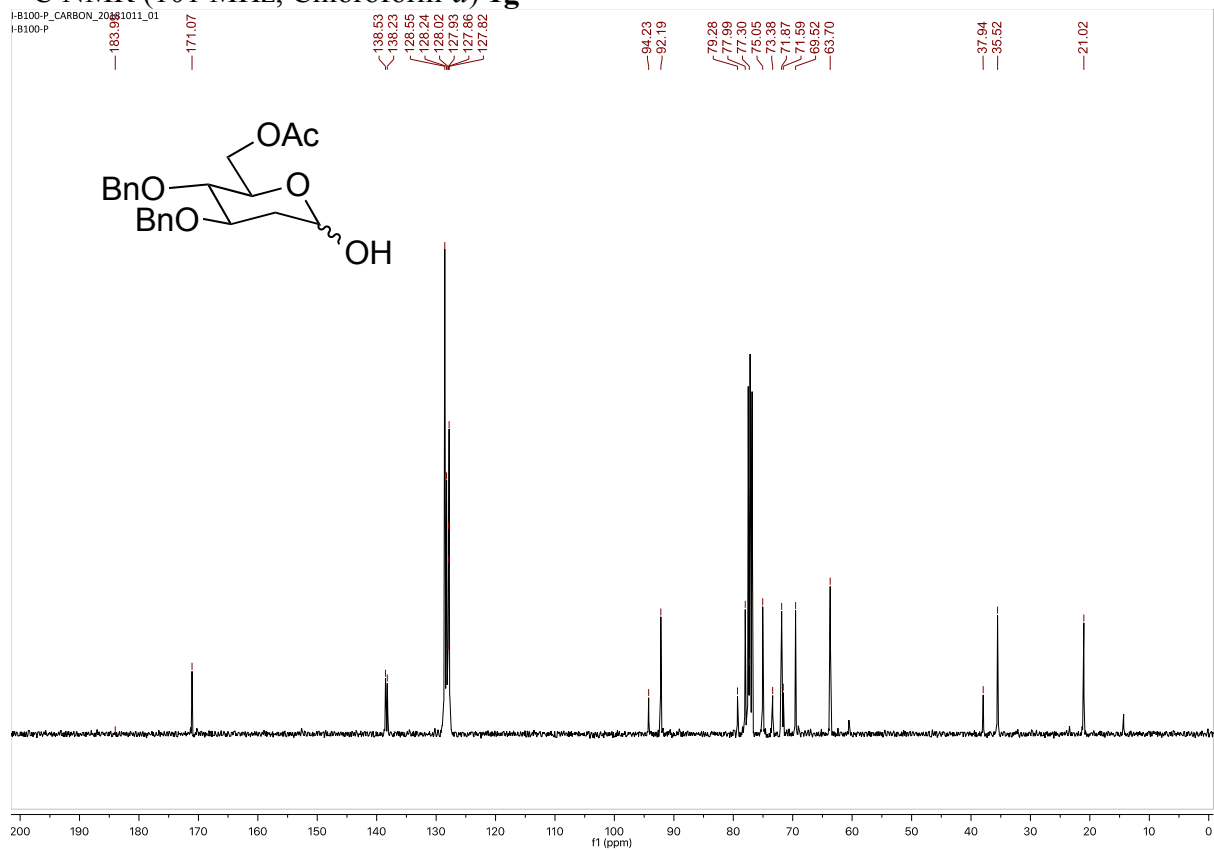

COSY (500 MHz, Chloroform-*d*) **1g**

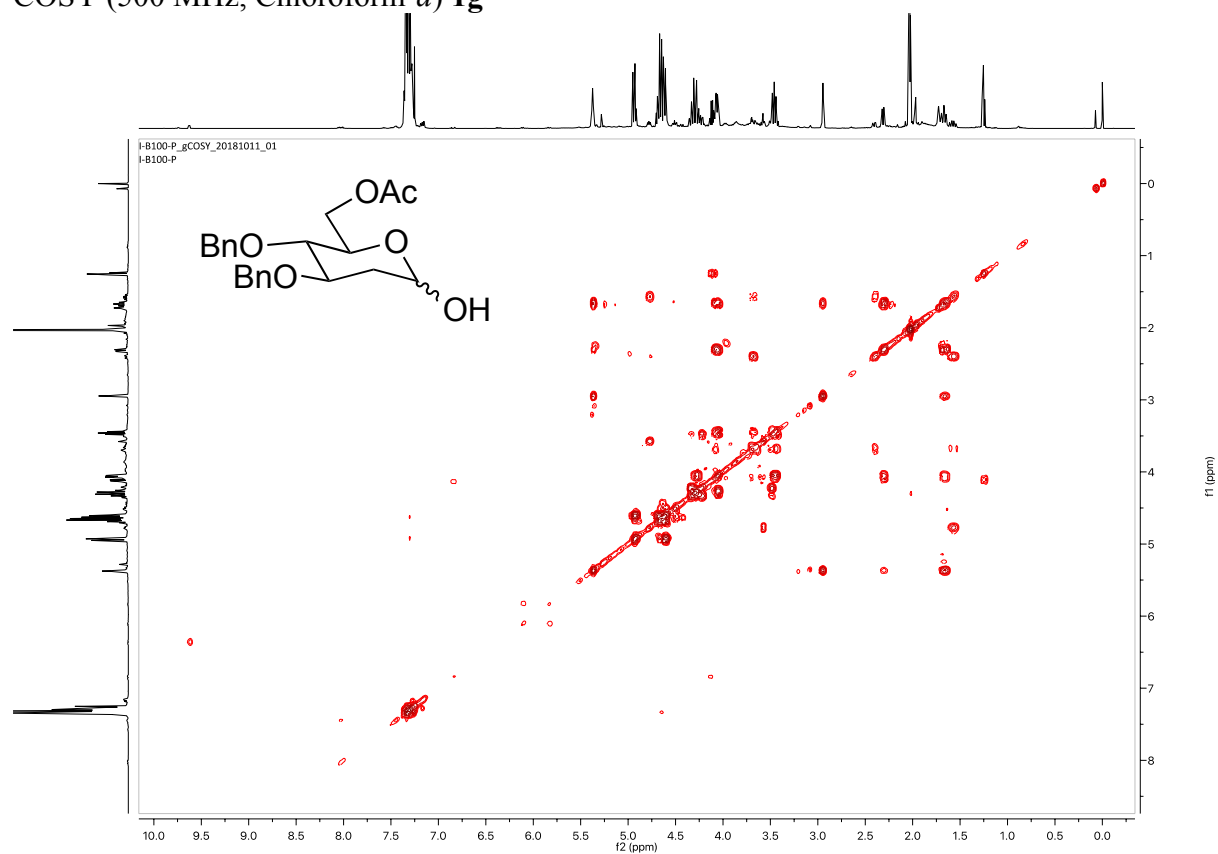

HSQC (500 MHz x 126 MHz, Chloroform-*d*) **1g**

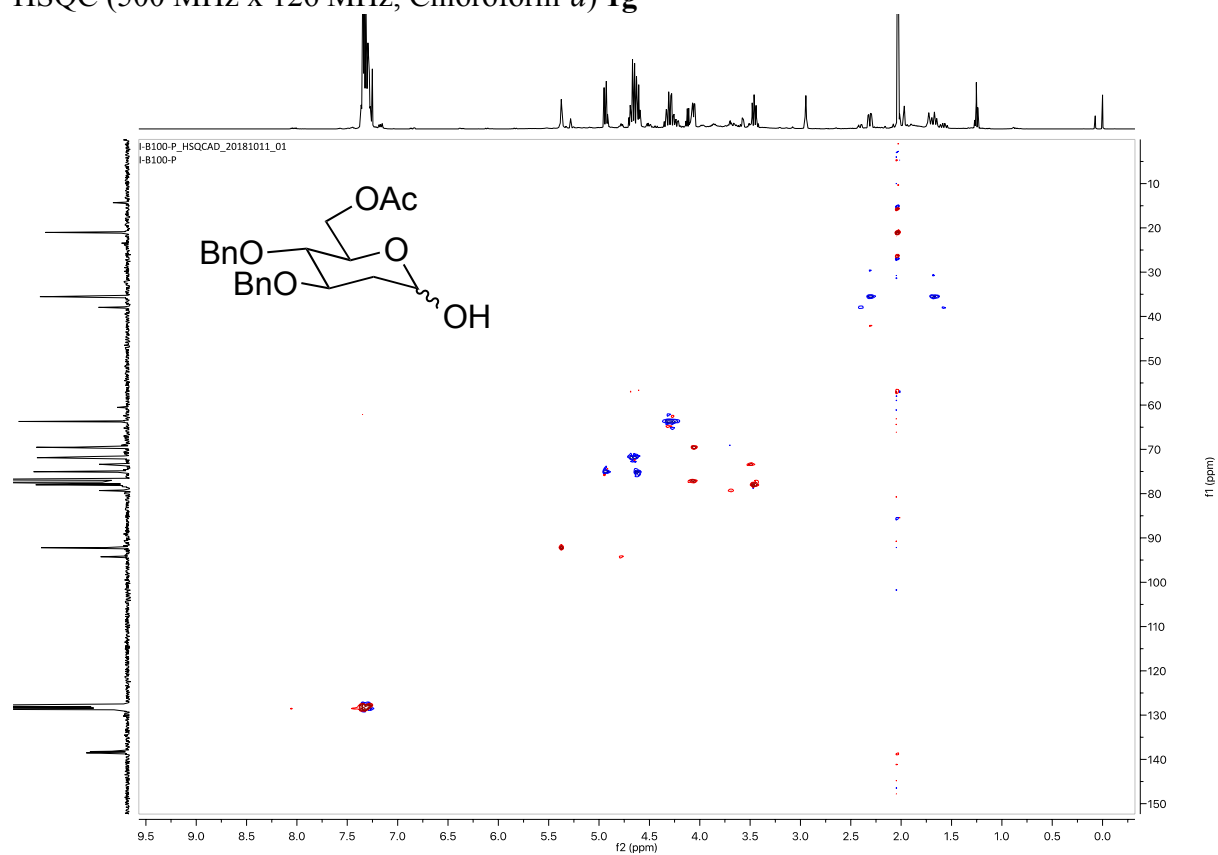

HMBC (400 MHz x 101 MHz, Chloroform-*d*) **1g**

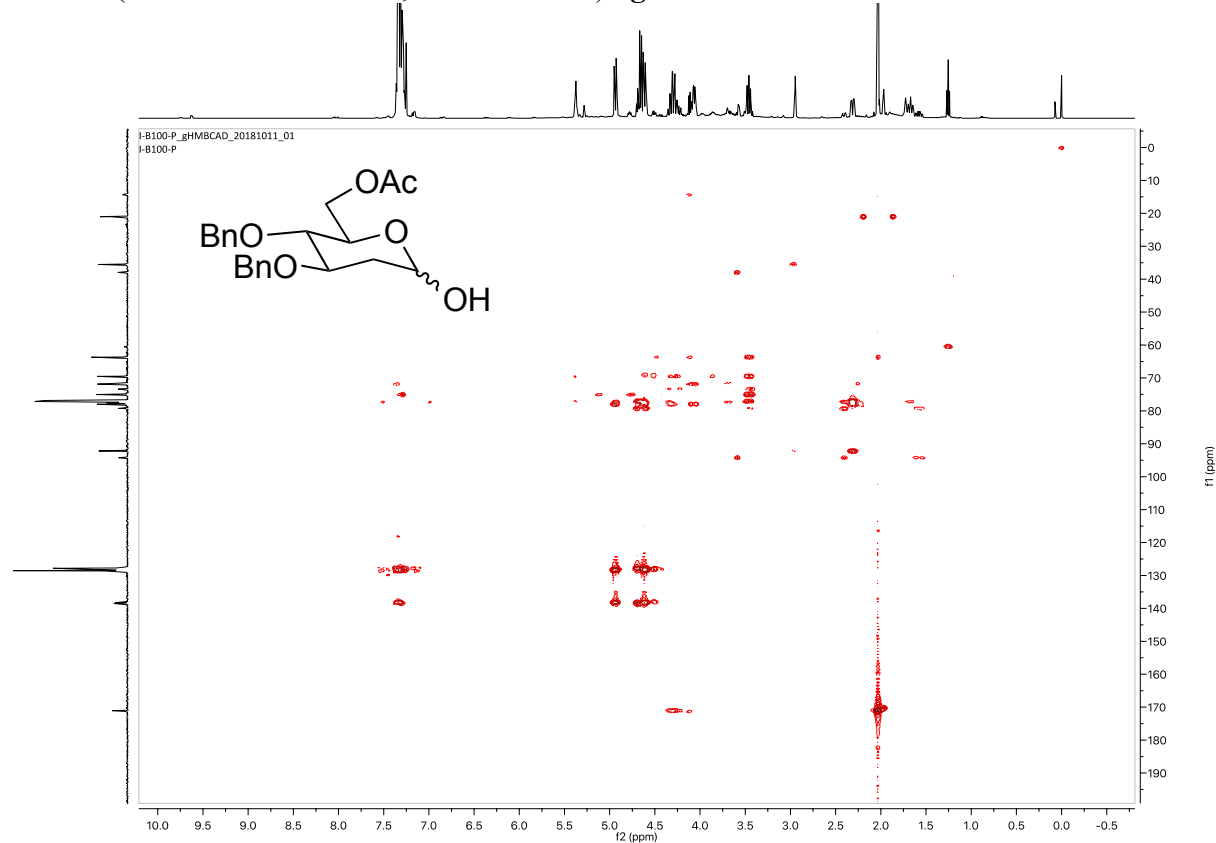

<sup>1</sup>H NMR (300 MHz, Chloroform-*d*) **S1**

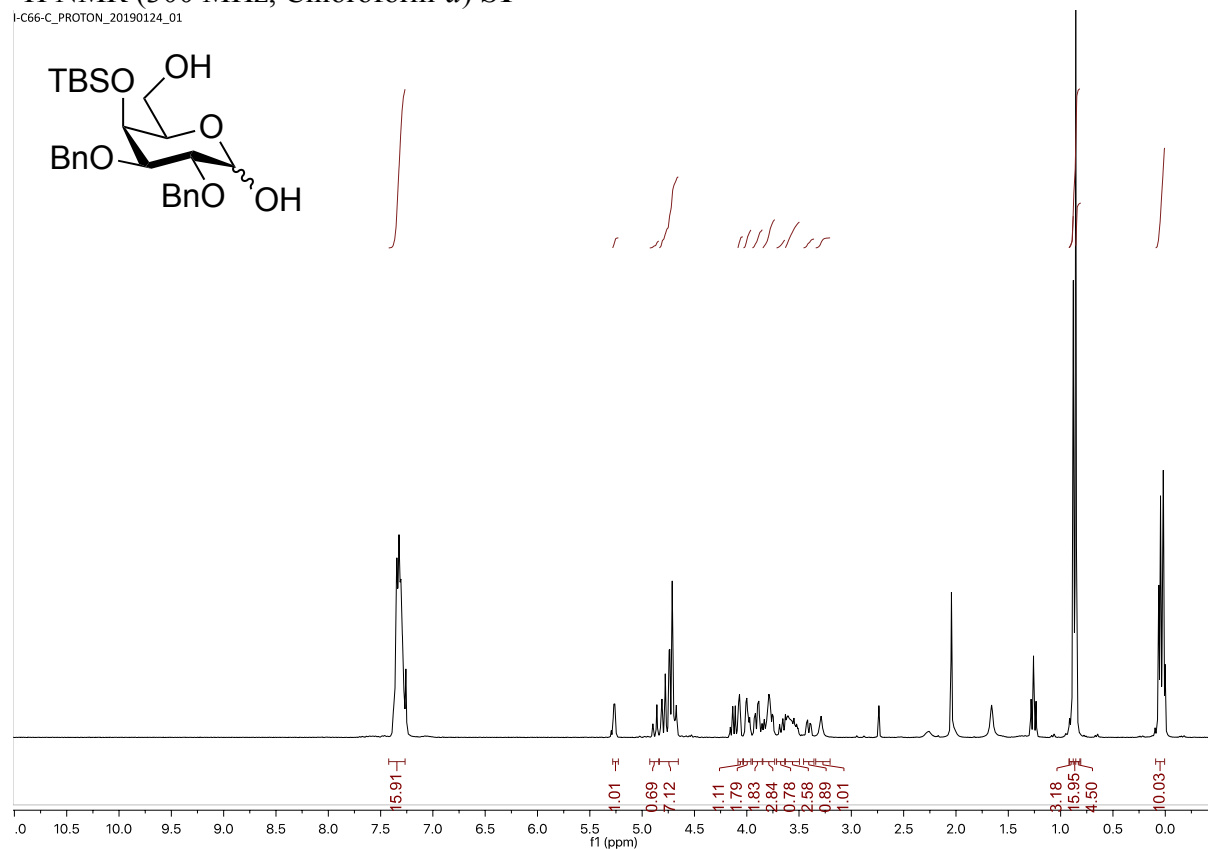

I-C66-A CARBON 20190125 01

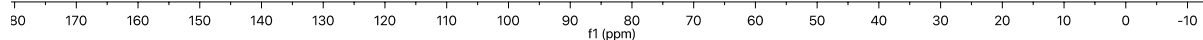

CCST (500 MHz, chloroform-*d*) 5.1

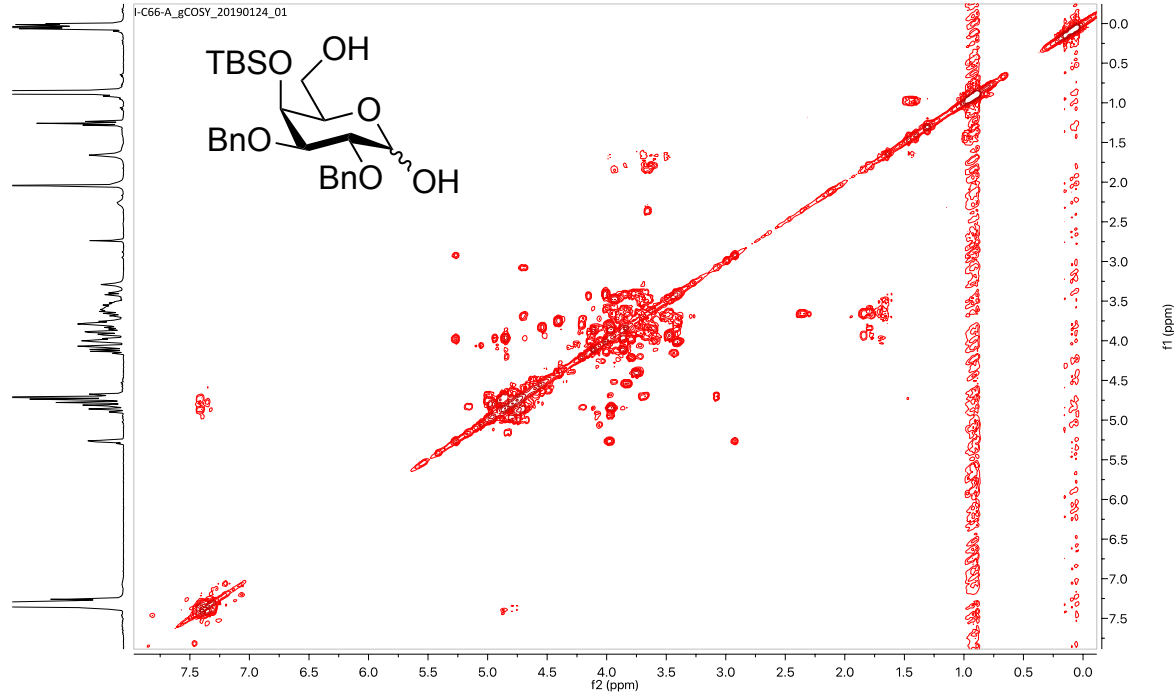

# HSQC (500 MHz x 126 MHz, Chloroform-*d*) S1

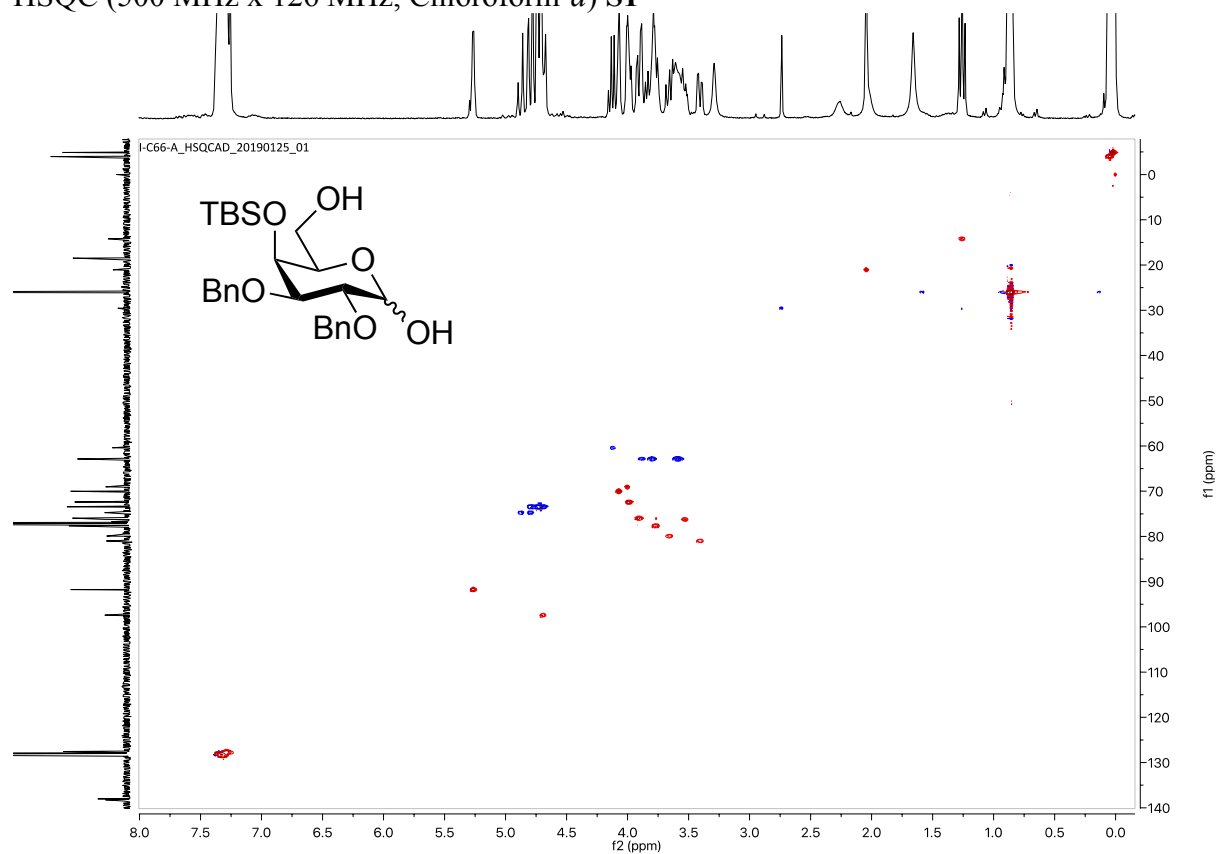

# HMBC (500 MHz x 126 MHz, Chloroform-*d*) S1

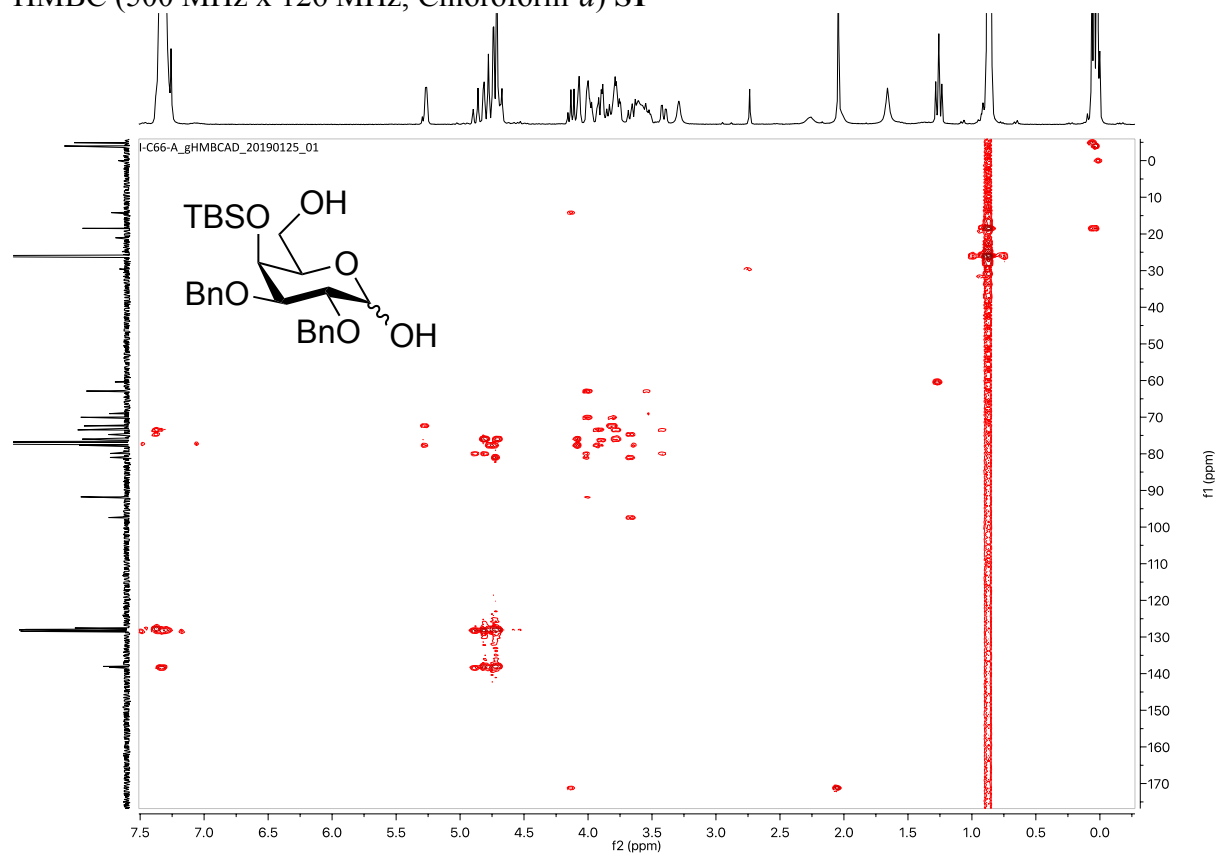

I-C68-Cr\_PROTON\_20190125\_01  
I-C68-Cr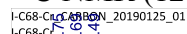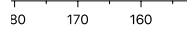

COSY (500 MHz, Chloroform-d) S2

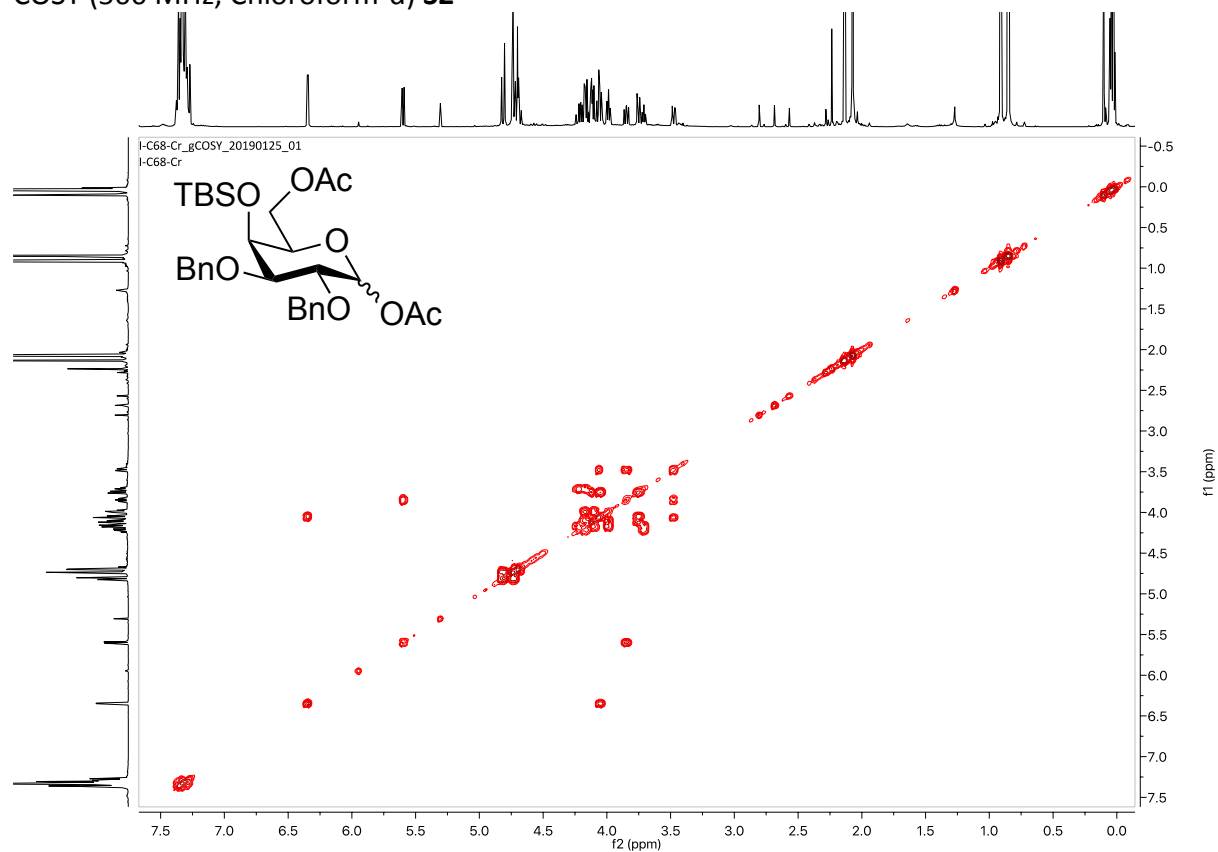

HSQC (500 MHz x 126 MHz, Chloroform-d) S2

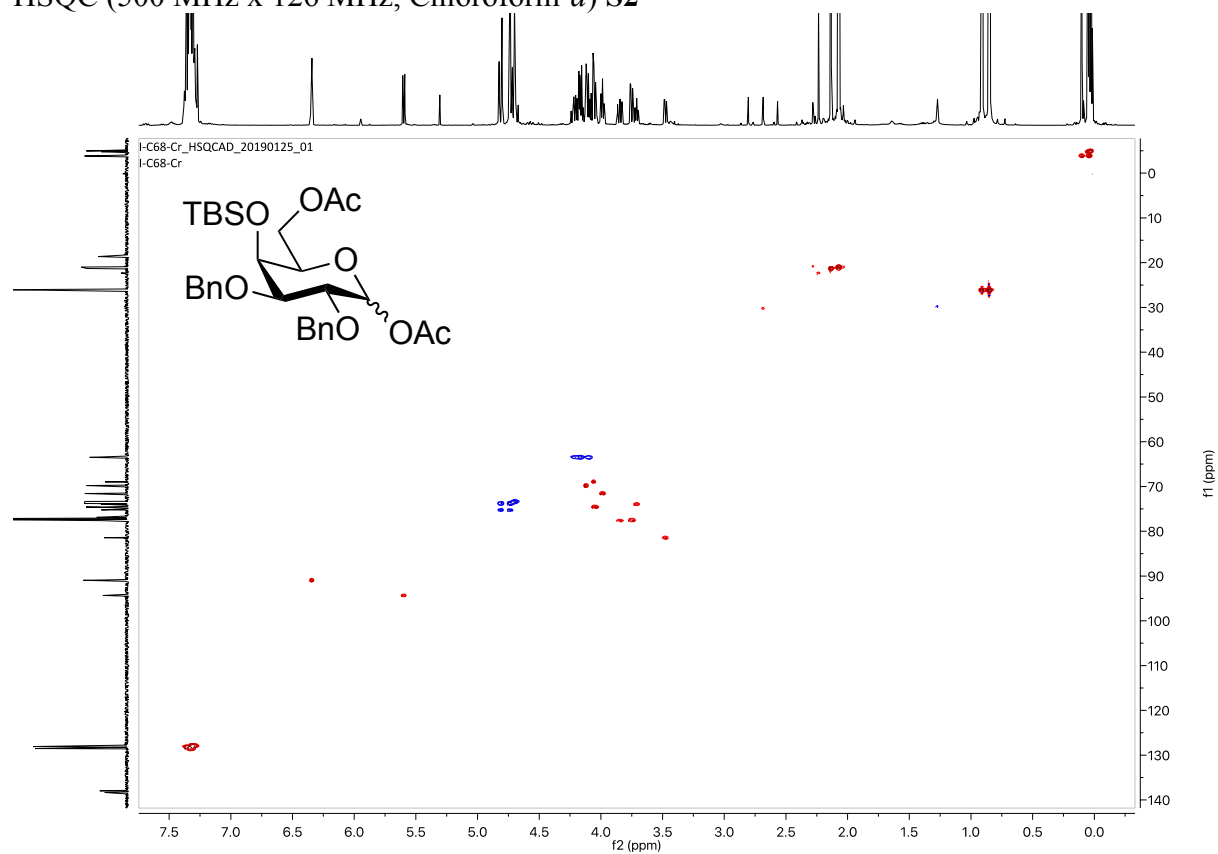

<sup>1</sup>H NMR (500 MHz, Chloroform-d) **11**

CC(=O)OC[C@H]1O[C@@H](OC(=O)c2ccccc2)[C@H](OC(=O)c3ccccc3)[C@@H](OC(=O)c4ccccc4)[C@H](OC(=O)c5ccccc5)[C@H]1O

11.92, 1.00, 0.32, 0.74, 0.71, 0.73, 2.46, 2.27, 0.32, 1.01, 1.02, 0.61, 0.34, 0.94, 2.81, 2.83, 3.22, 0.91, 2.89, 0.93, 2.94

<sup>13</sup>C NMR (126 MHz, Chloroform-*d*) **1h**

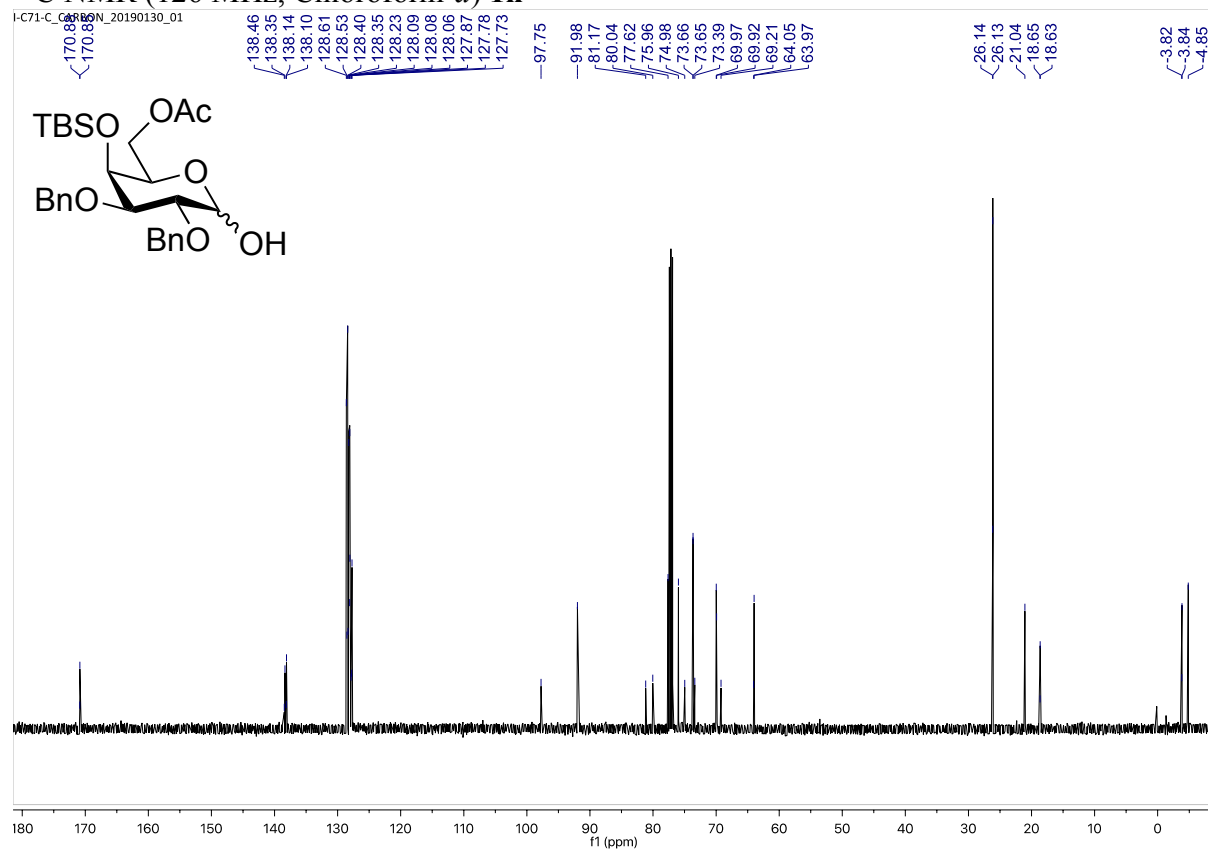

COSY (500 MHz, Chloroform-*d*) **1h**

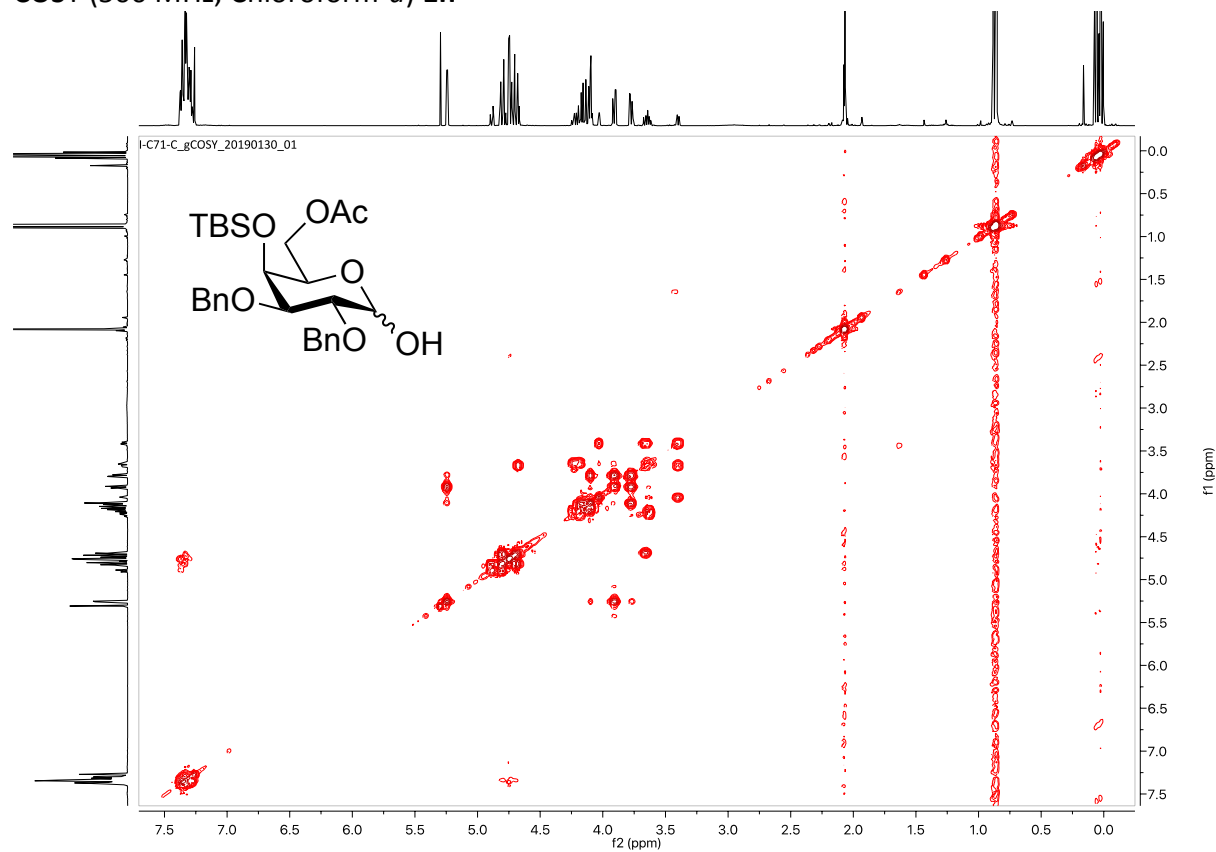

HSQC (500 MHz x 126 MHz, Chloroform-*d*) **1h**

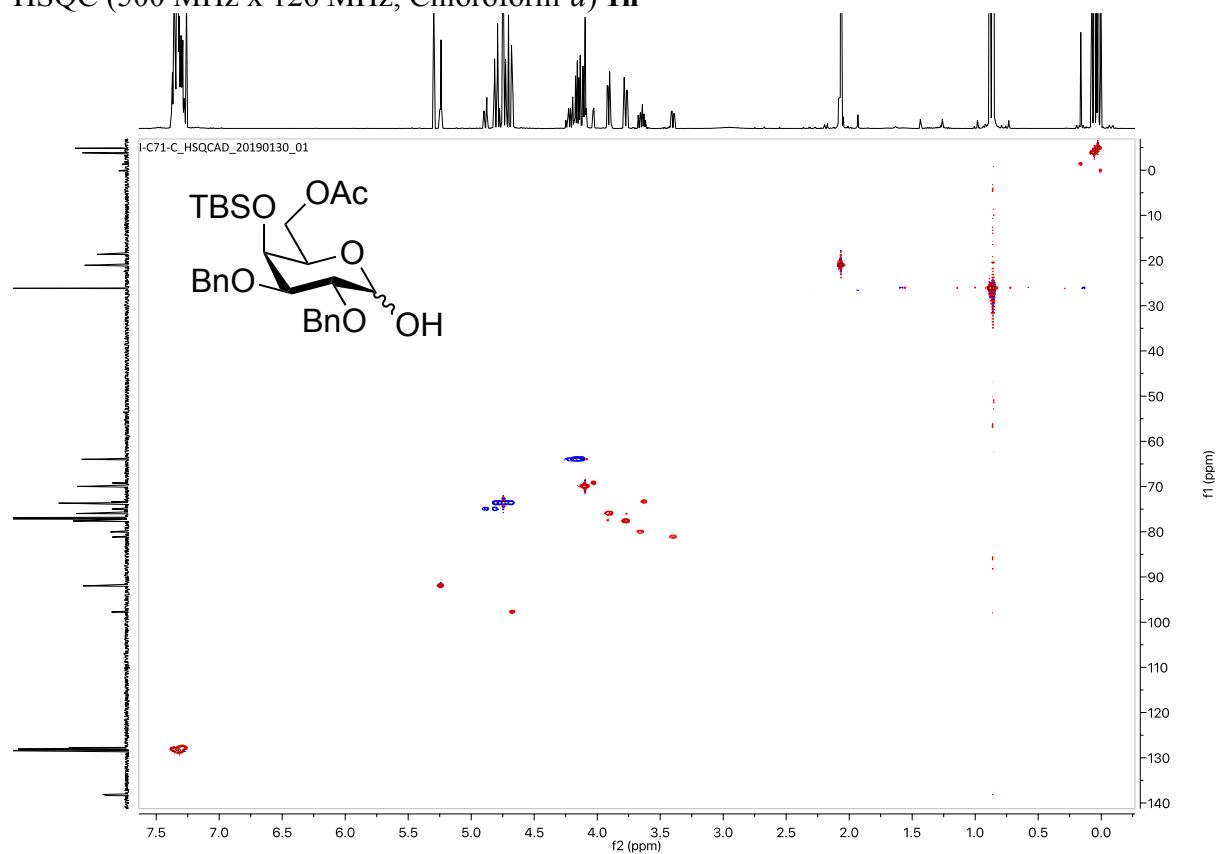

HMBC (500 MHz x 126 MHz, Chloroform-*d*) **1h**

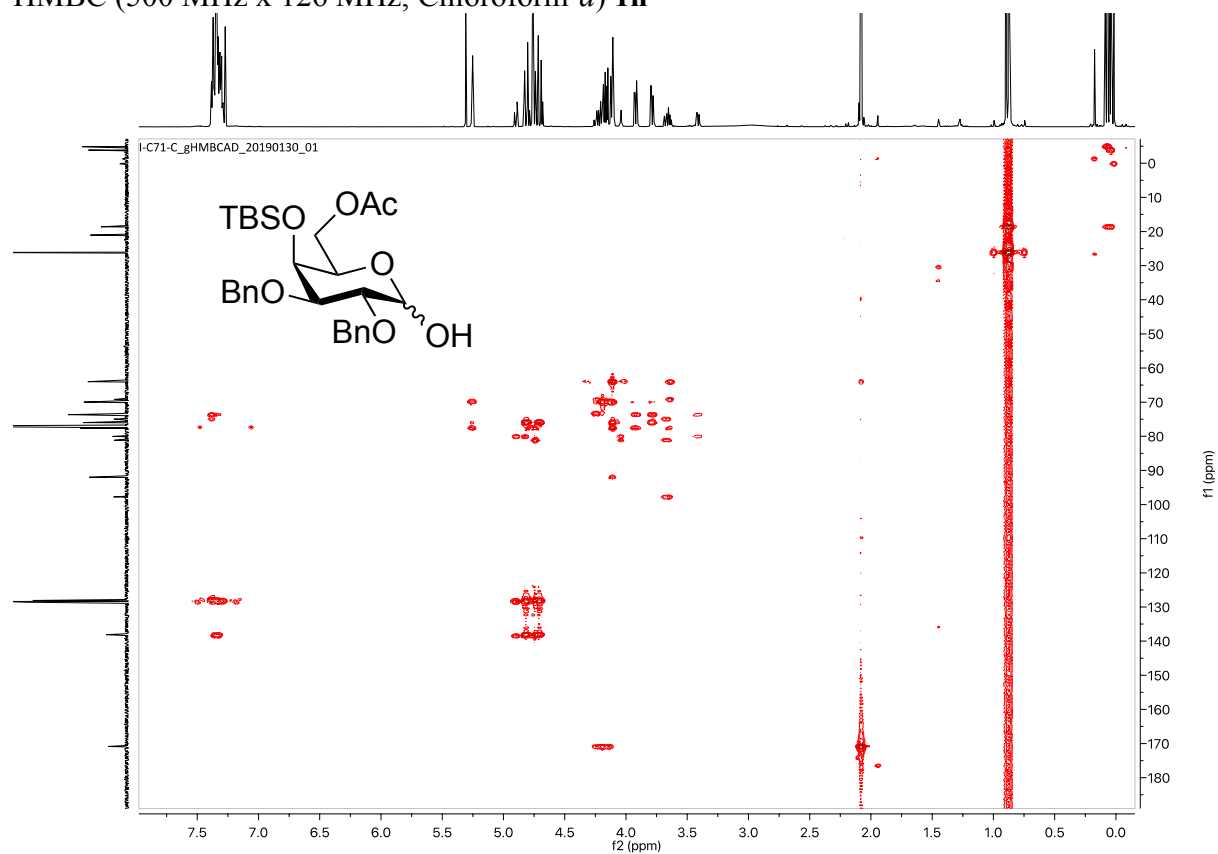

<sup>1</sup>H NMR (500 MHz, Chloroform-*d*) **S5**

I-C60-A-solid\_PROTON\_20190118\_01  
I-C60-A-solid

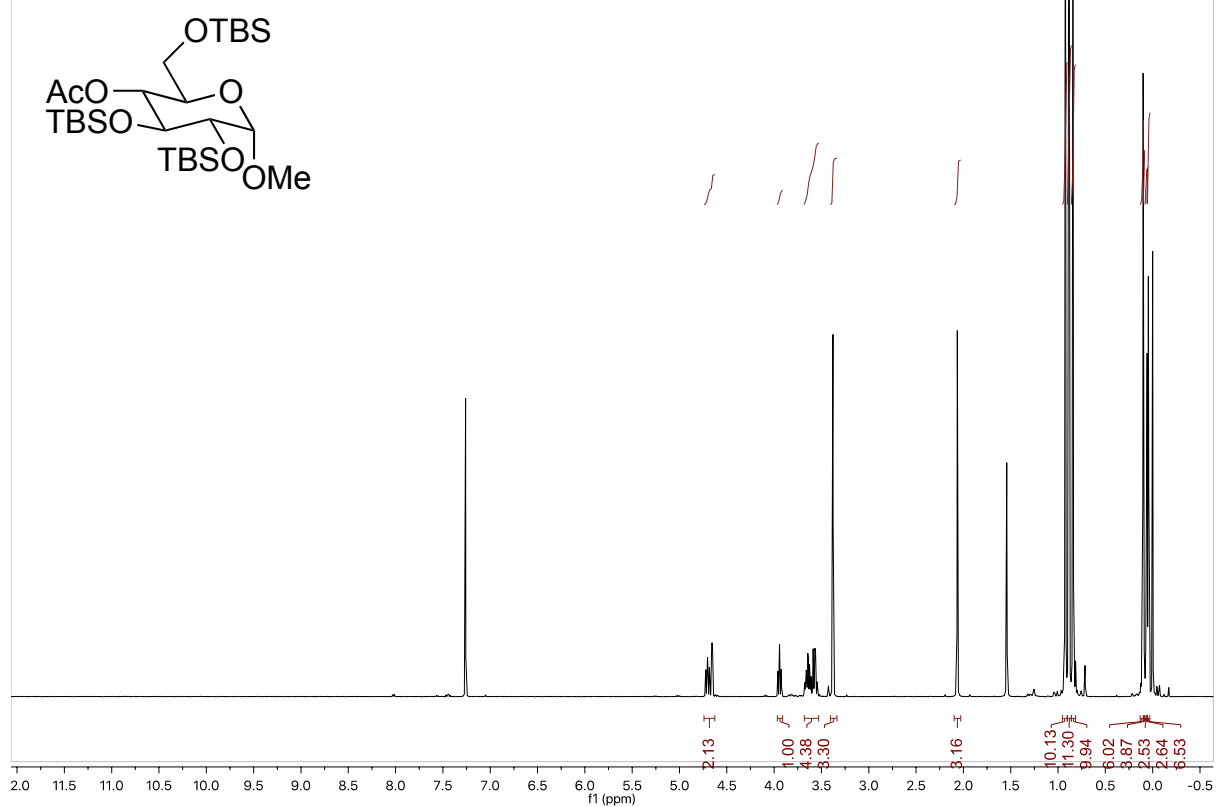

<sup>1</sup>H NMR (500 MHz, Chloroform-*d*) **S6**

I-C60-D\_PROTON\_20190118\_01  
I-C60-D  
syrup

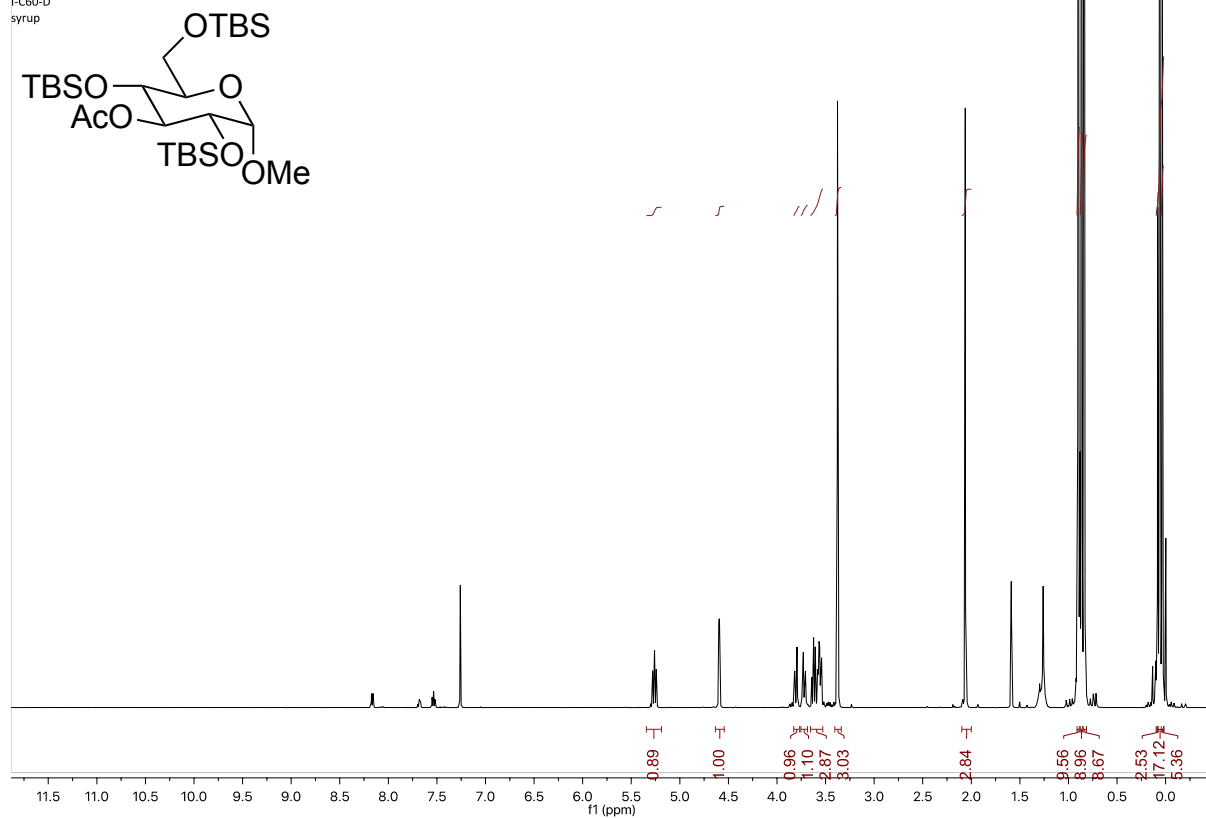

<sup>1</sup>H NMR (500 MHz, Chloroform-*d*) S7

I-C70-P\_PROTON\_20190131\_01

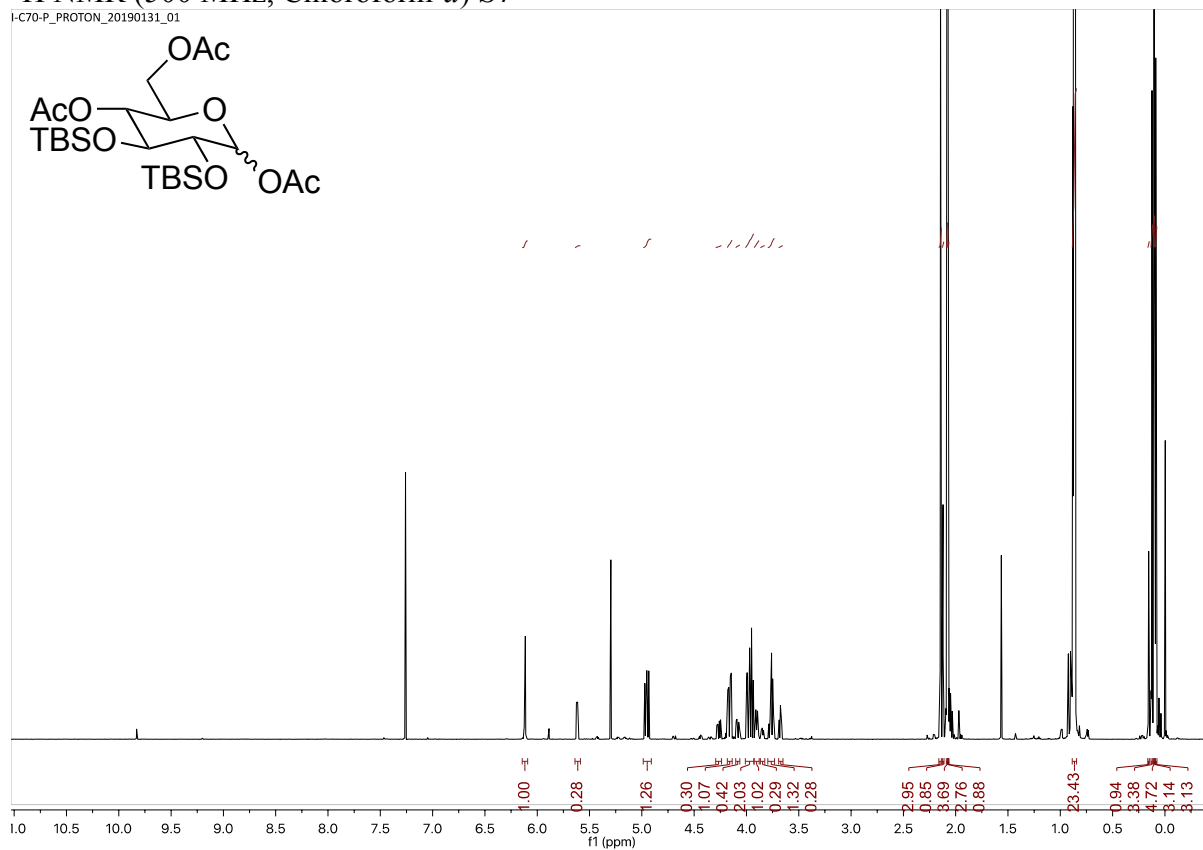

<sup>13</sup>C NMR (126 MHz, Chloroform-*d*) S7

I-C70-P\_PROTON\_20190131\_01

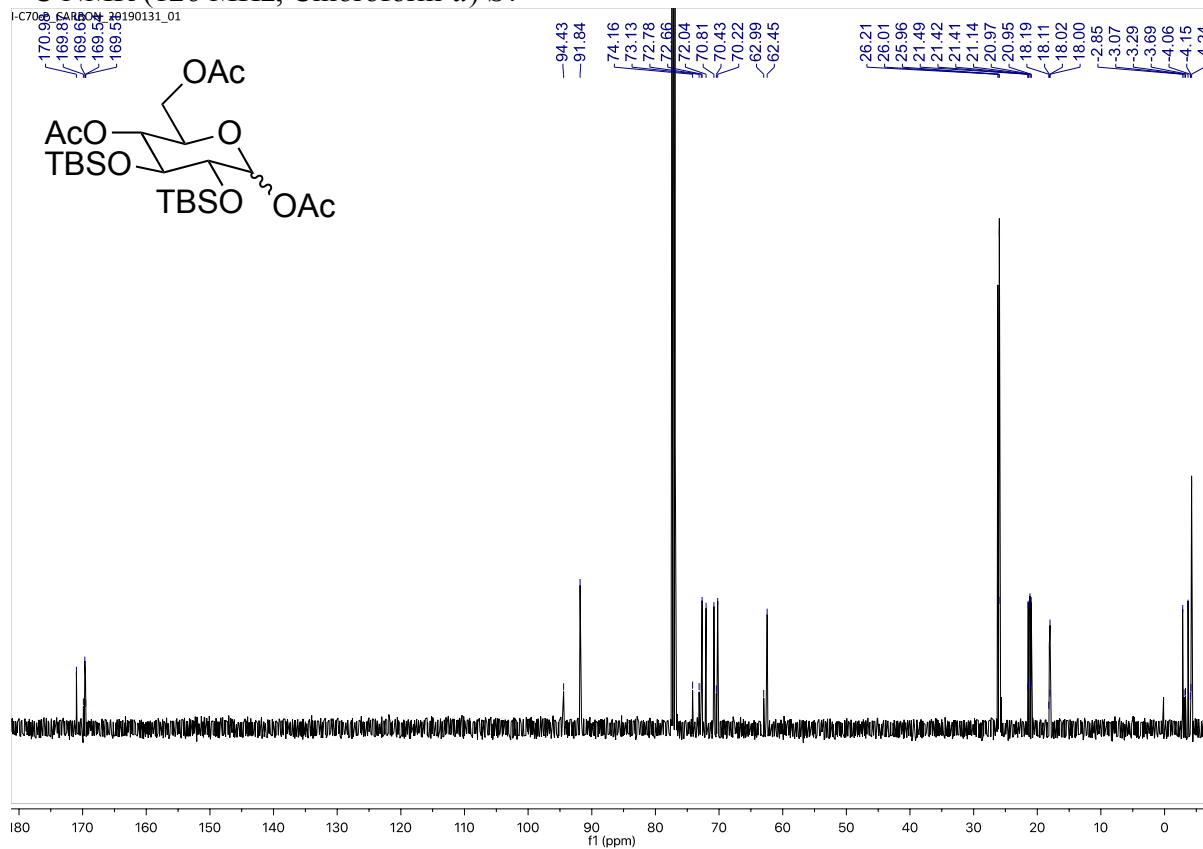

COSY (500 MHz, Chloroform-*d*) S7

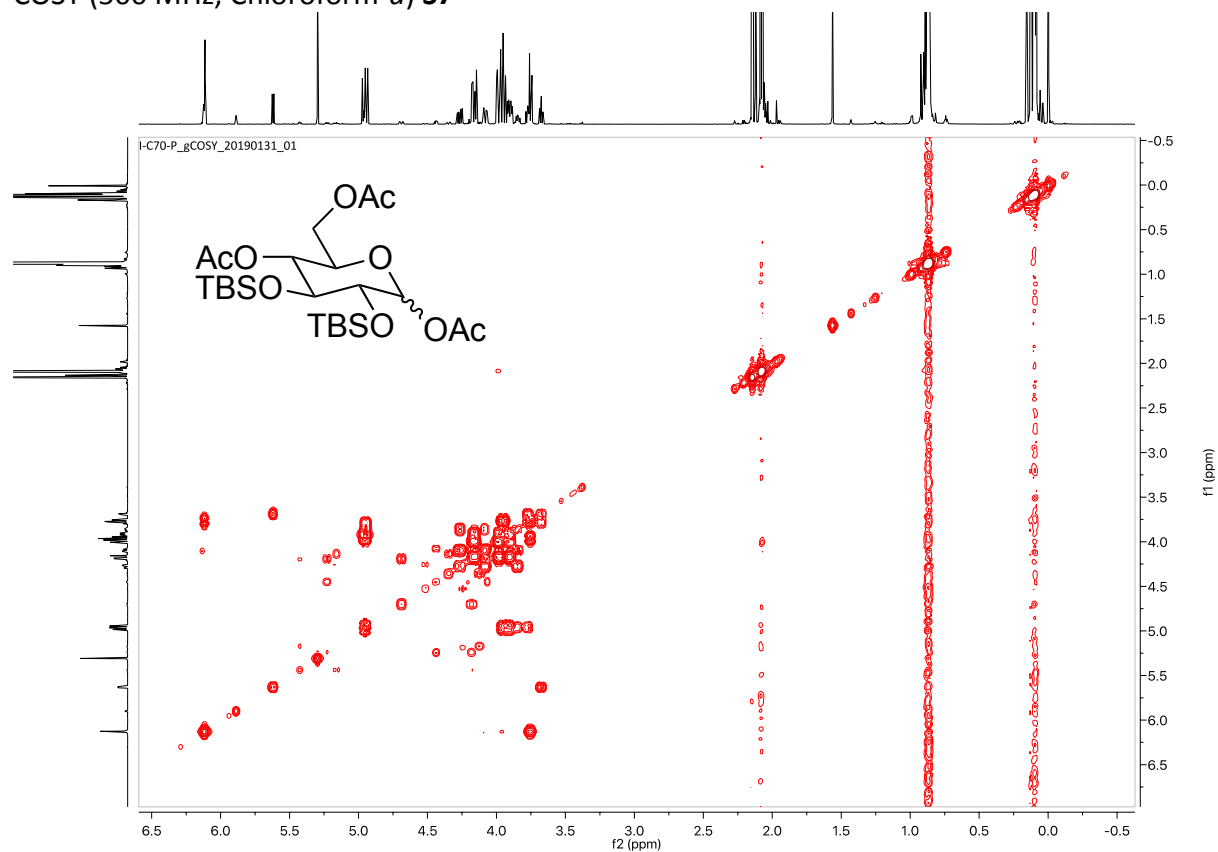

HSQC (500 MHz x 126 MHz, Chloroform-*d*) S7

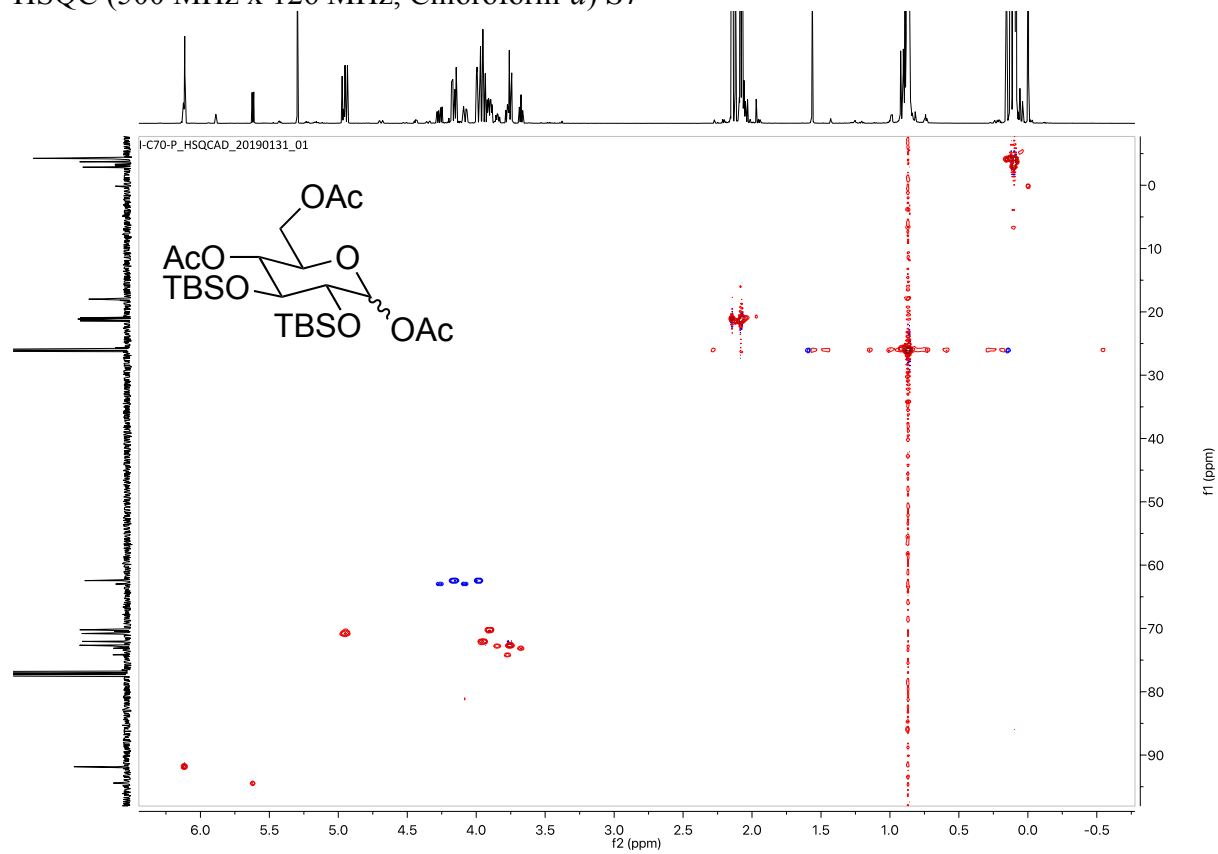

# HMBC (500 MHz x 126 MHz, Chloroform-*d*) S7

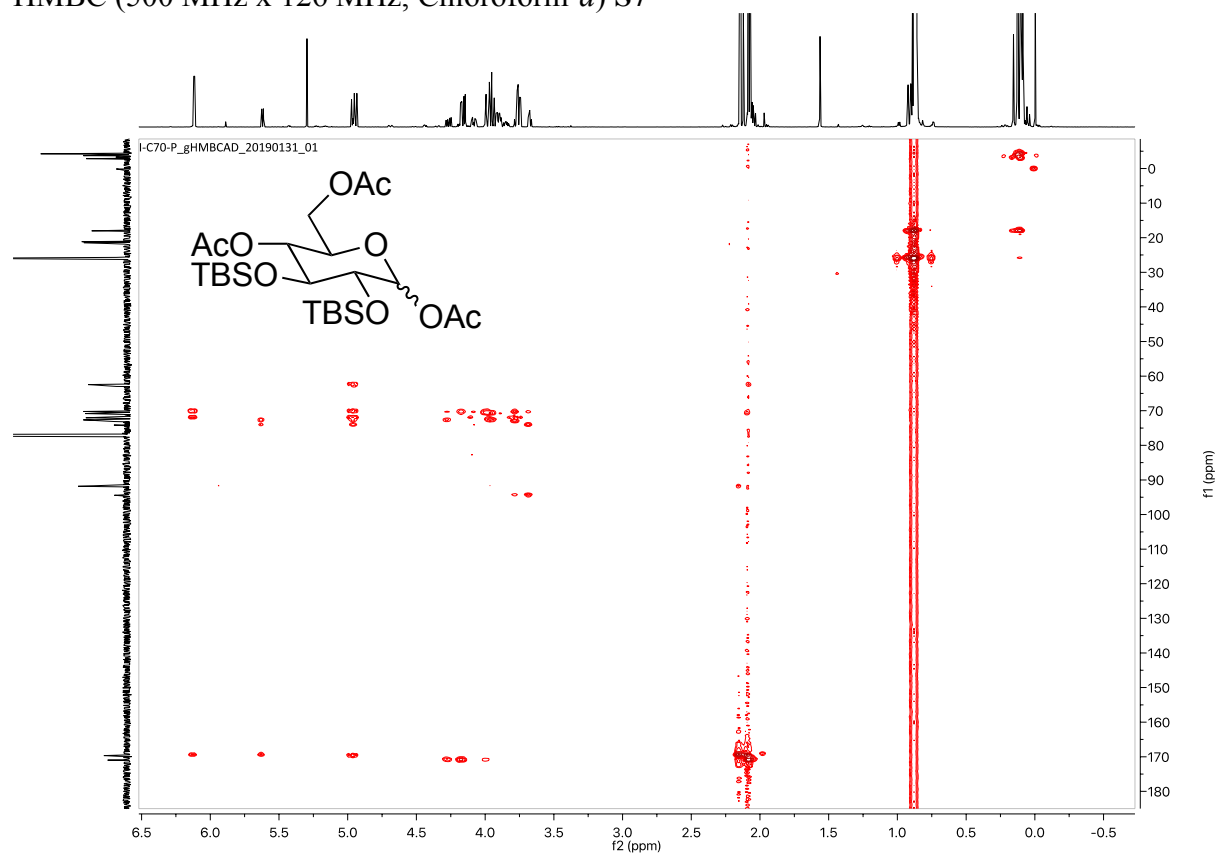

# <sup>1</sup>H NMR (500 MHz, Chloroform-*d*) S8

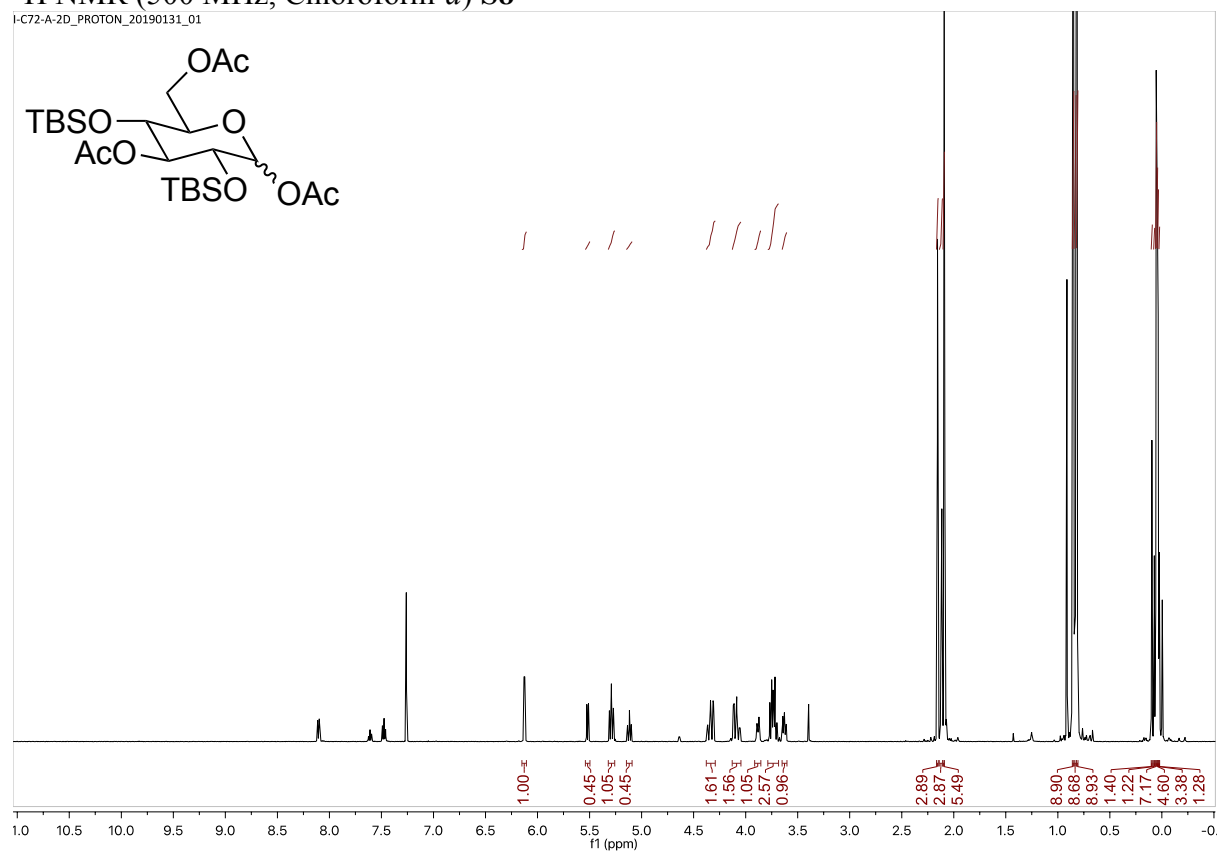

<sup>13</sup>C NMR (126 MHz, Chloroform-*d*) **S8**

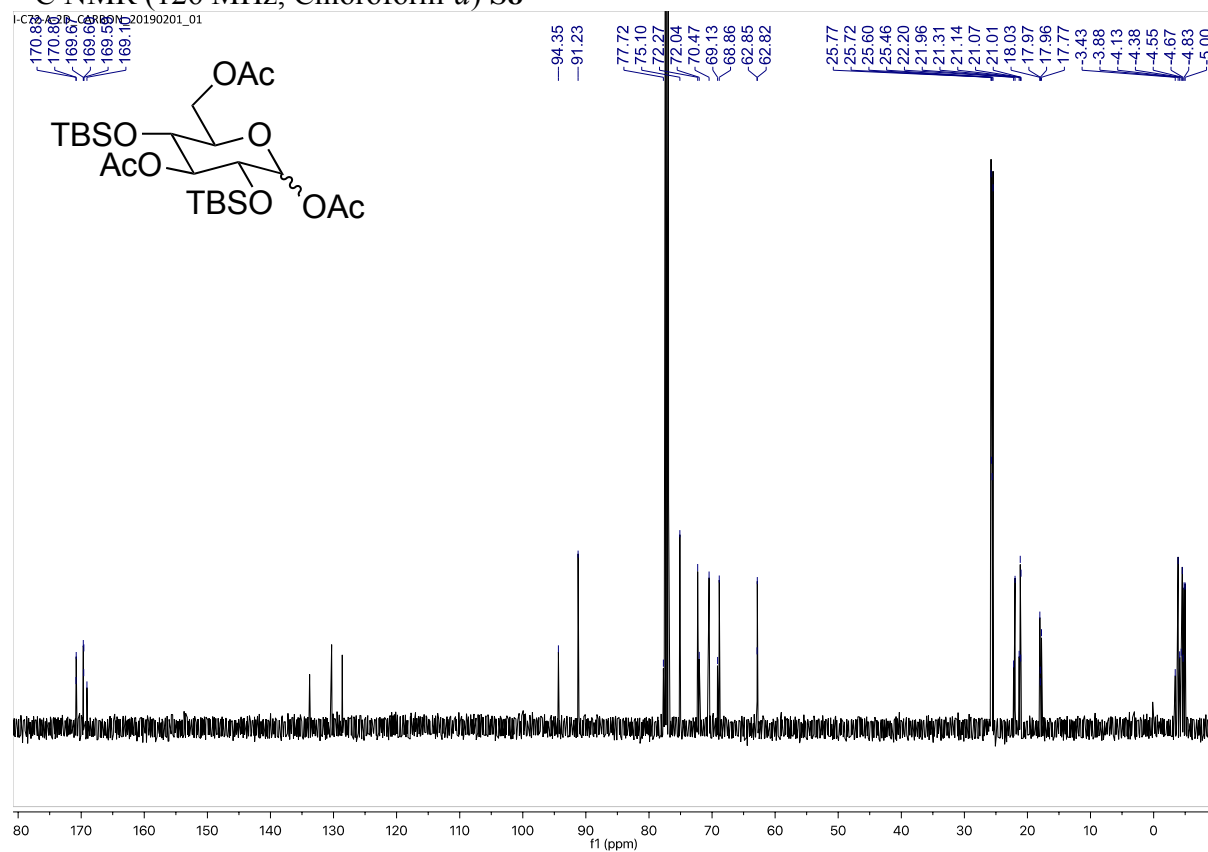

COSY (500 MHz, Chloroform-*d*) **S8**

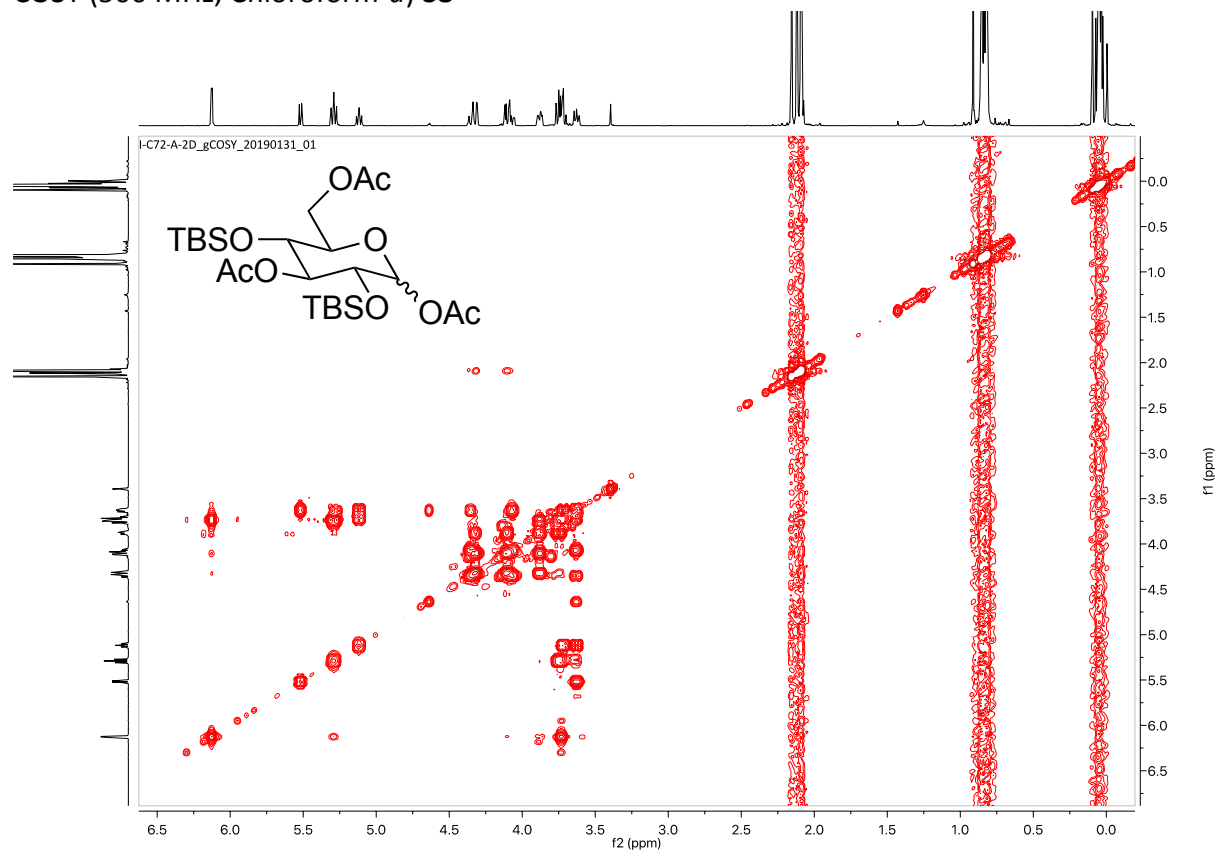

HSQC (500 MHz x 126 MHz, Chloroform-*d*) S8

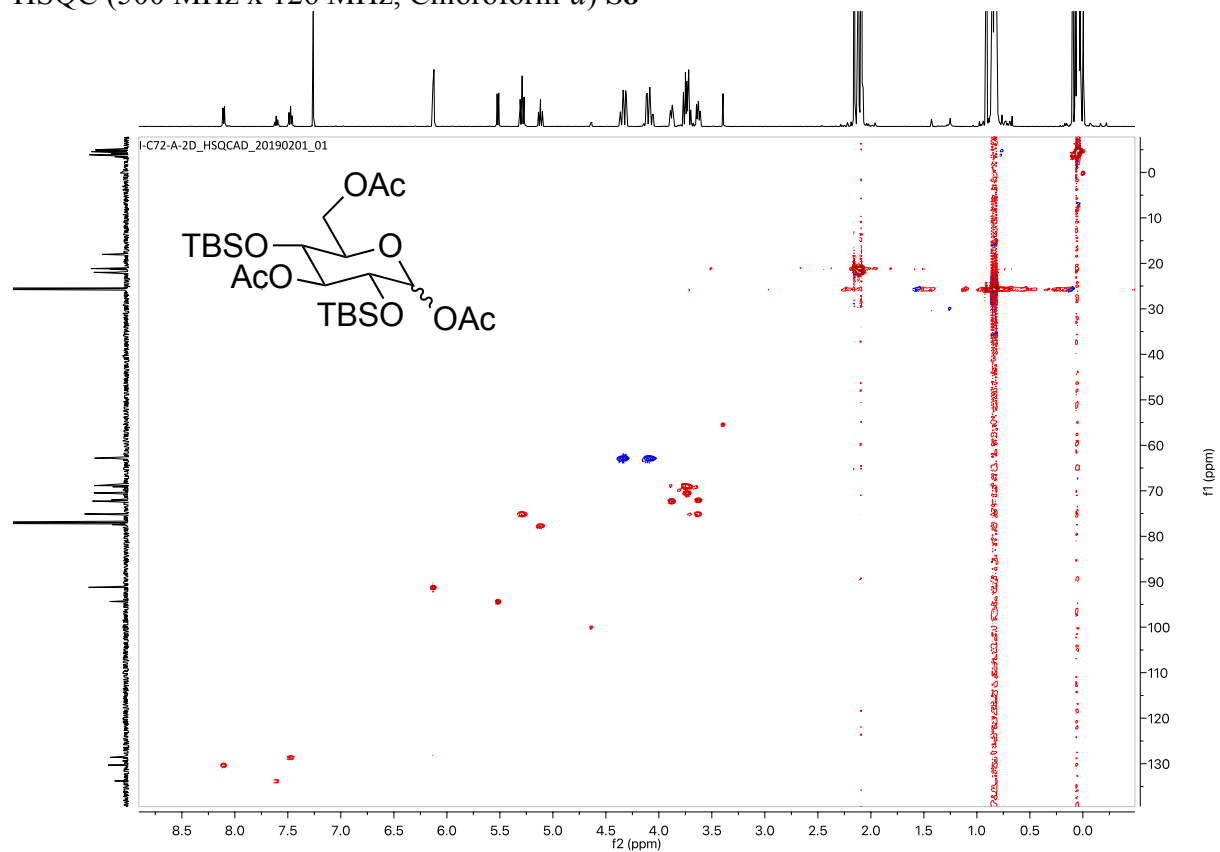

HMBC (500 MHz x 126 MHz, Chloroform-*d*) S8

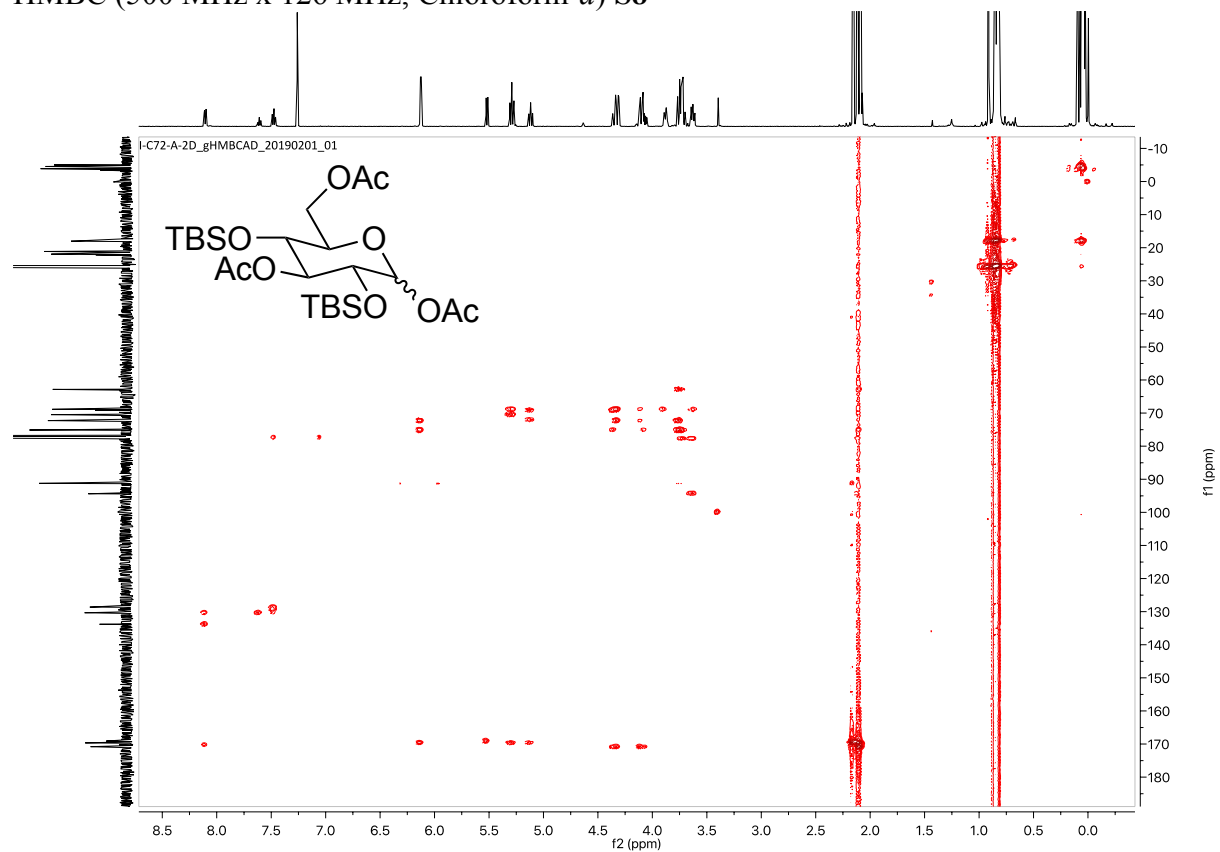

# <sup>1</sup>H NMR (500 MHz, Chloroform-*d*) **1q**

1-C73-C\_PROTON\_20190204\_01

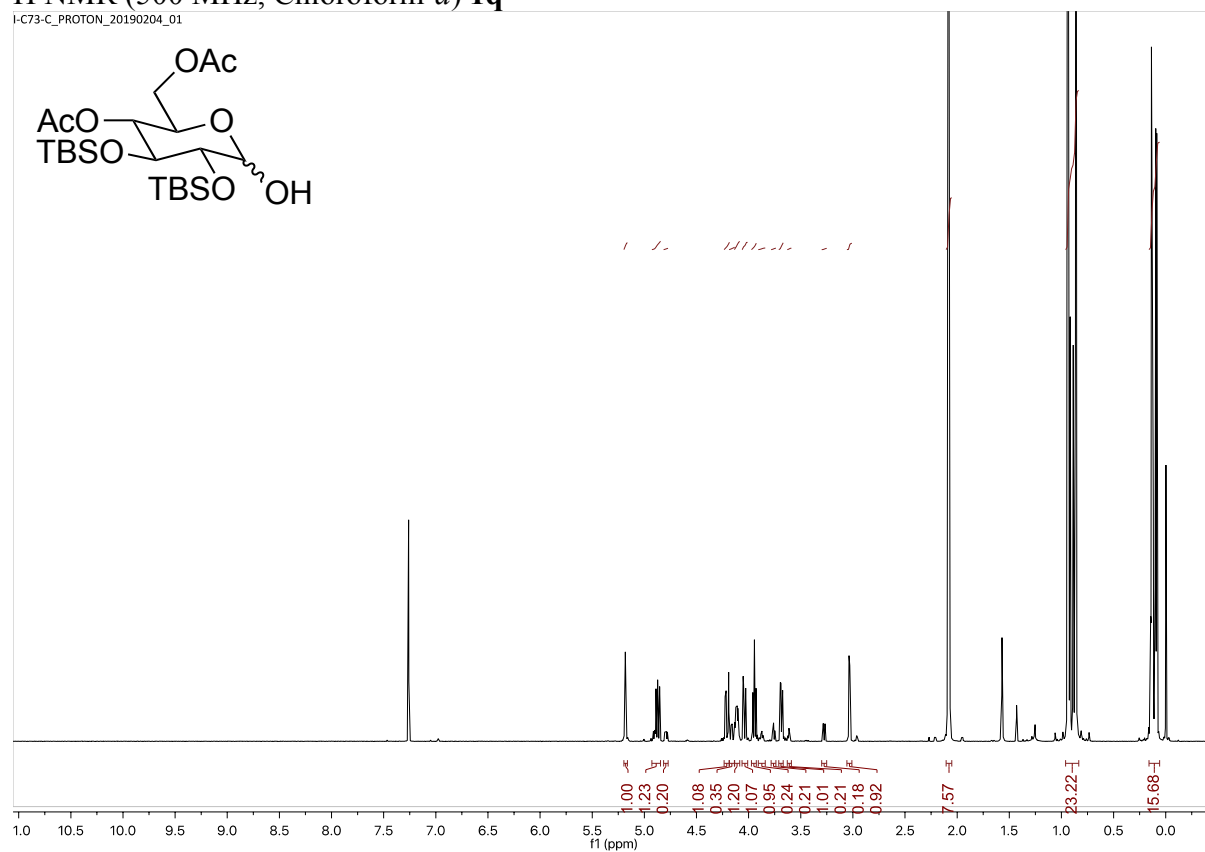

## <sup>13</sup>C NMR (126 MHz, Chloroform-*d*) **1q**

1-C73-C\_CARBON\_20190204\_01

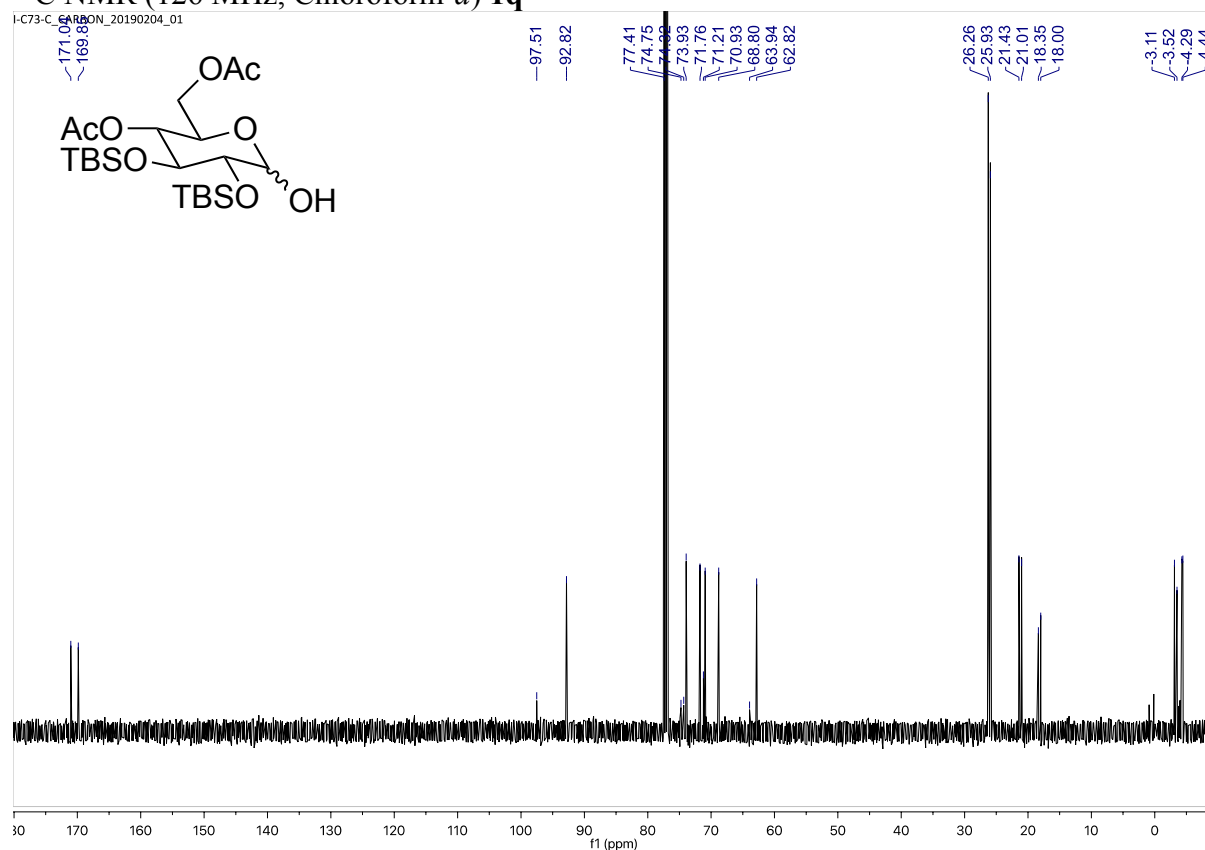

COSY (500 MHz, Chloroform-*d*) **1q**

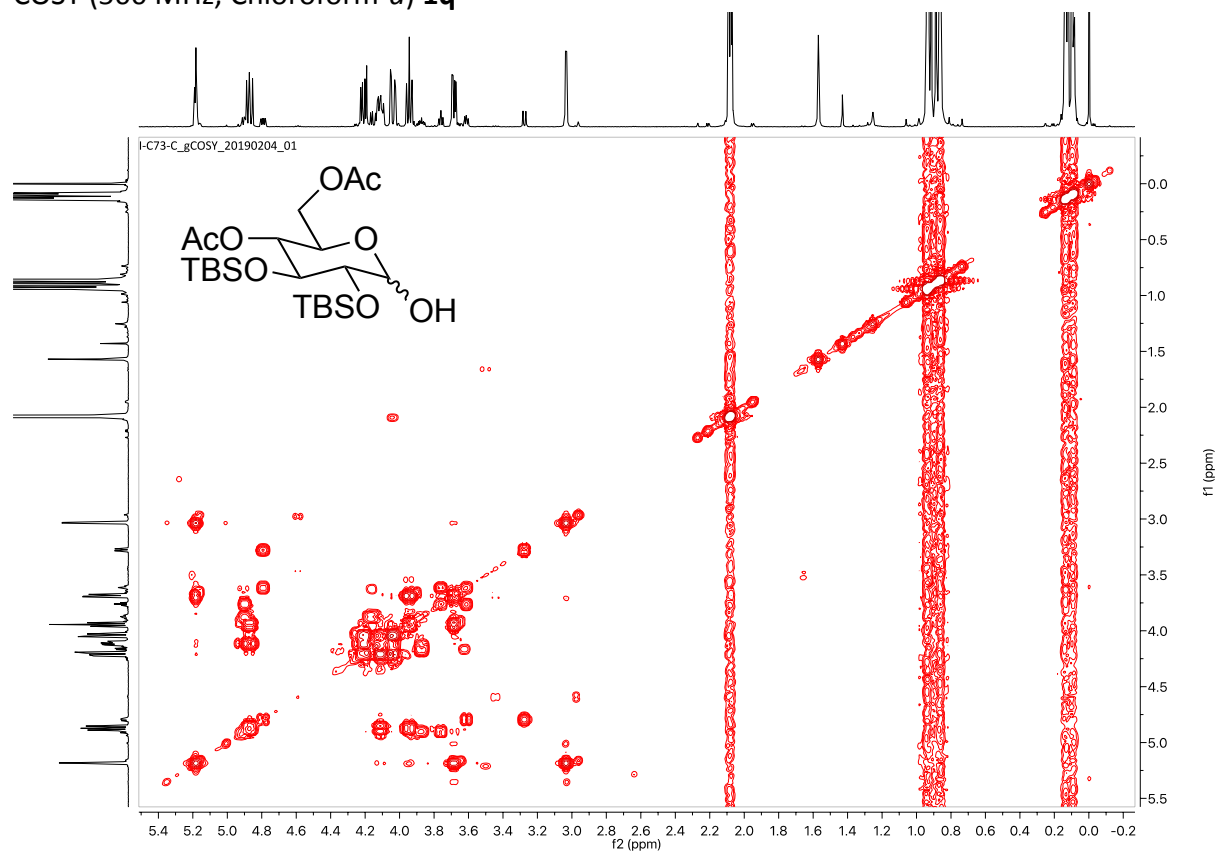

HSQC (500 MHz x 126 MHz, Chloroform-*d*) **1q**

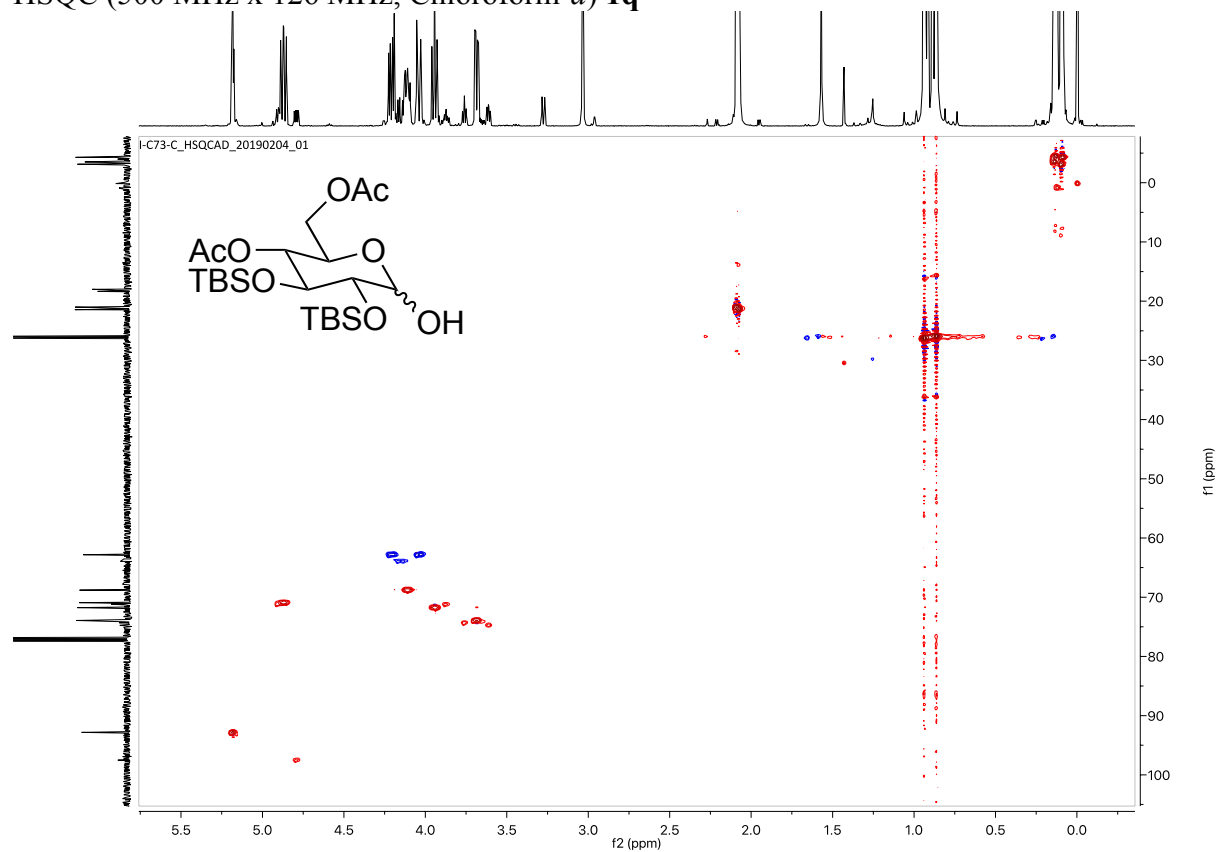

HMBC (500 MHz x 126 MHz, Chloroform-*d*) **1q**

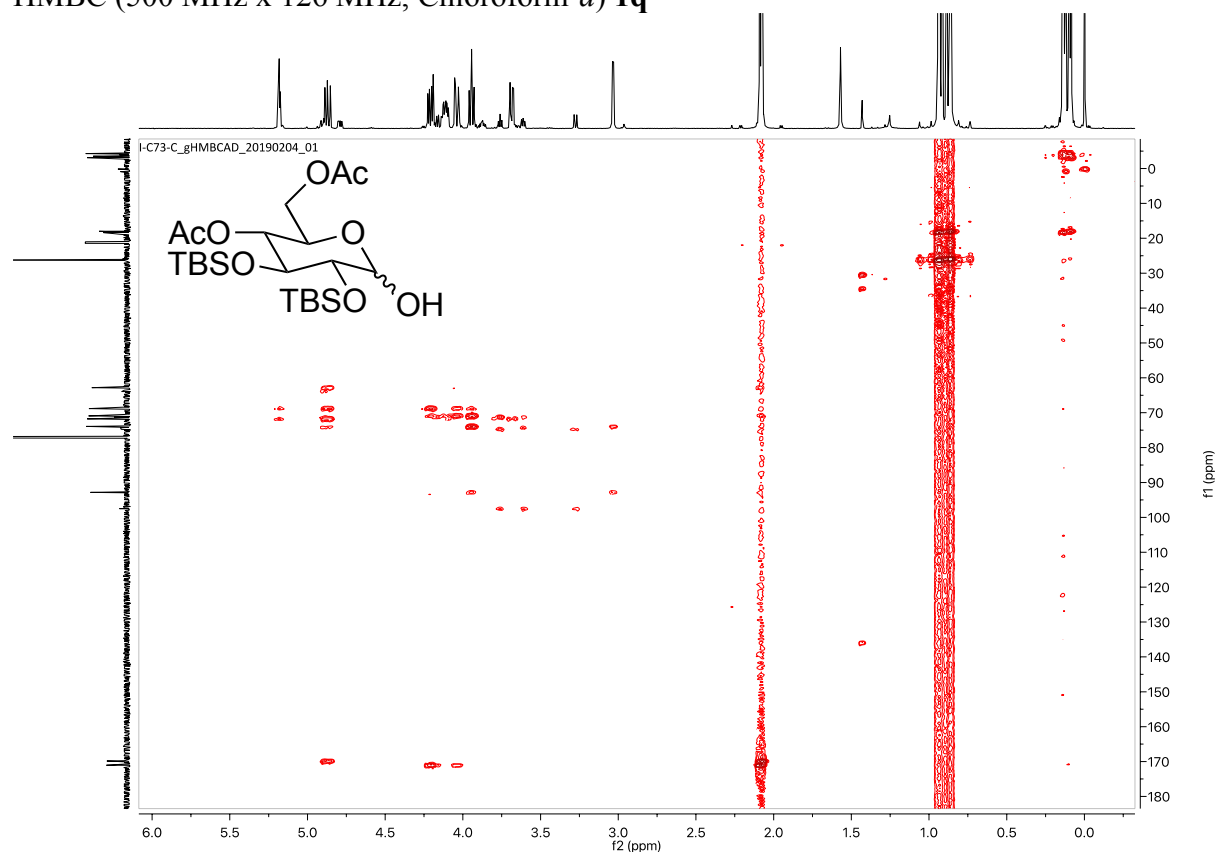

$^1\text{H}$  NMR (500 MHz, Chloroform-*d*) **1r**

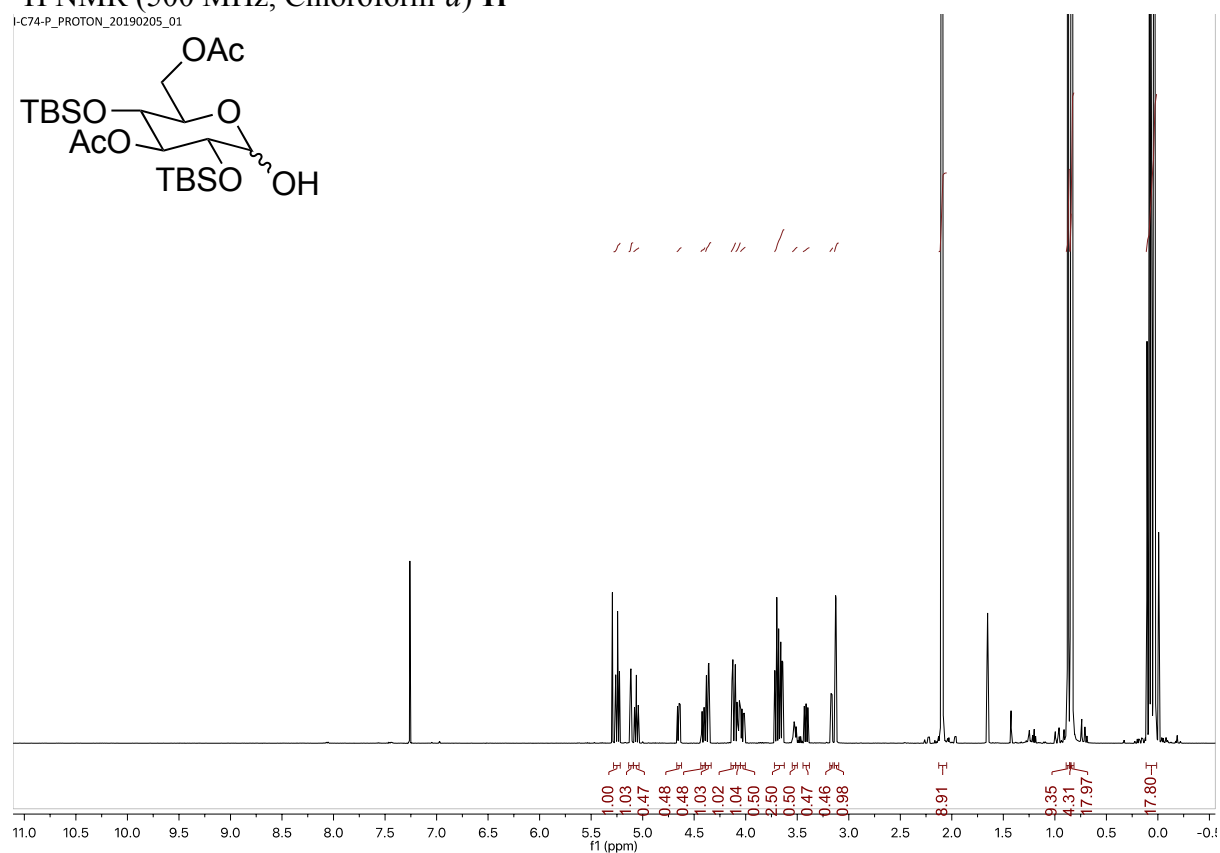

<sup>13</sup>C NMR (126 MHz, Chloroform-*d*) **1r**

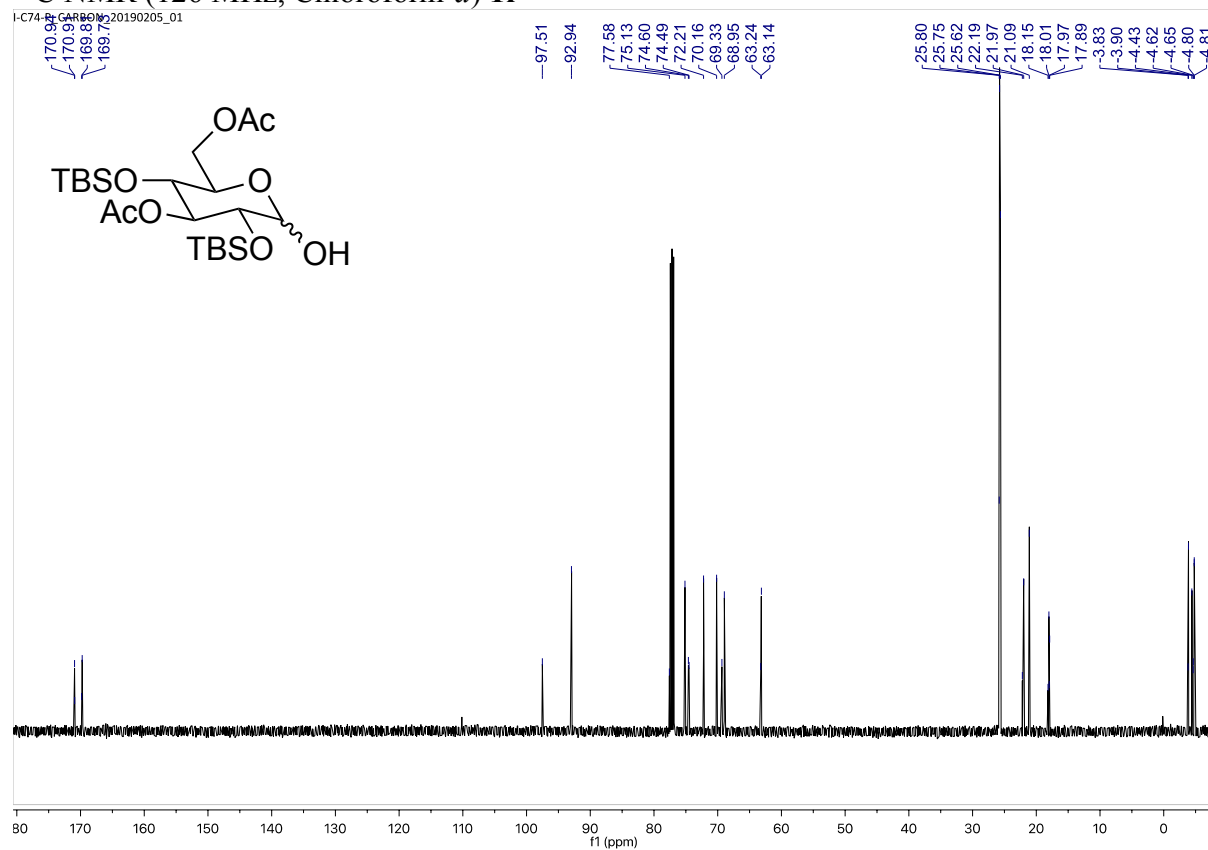

COSY (500 MHz, Chloroform-*d*) **1r**

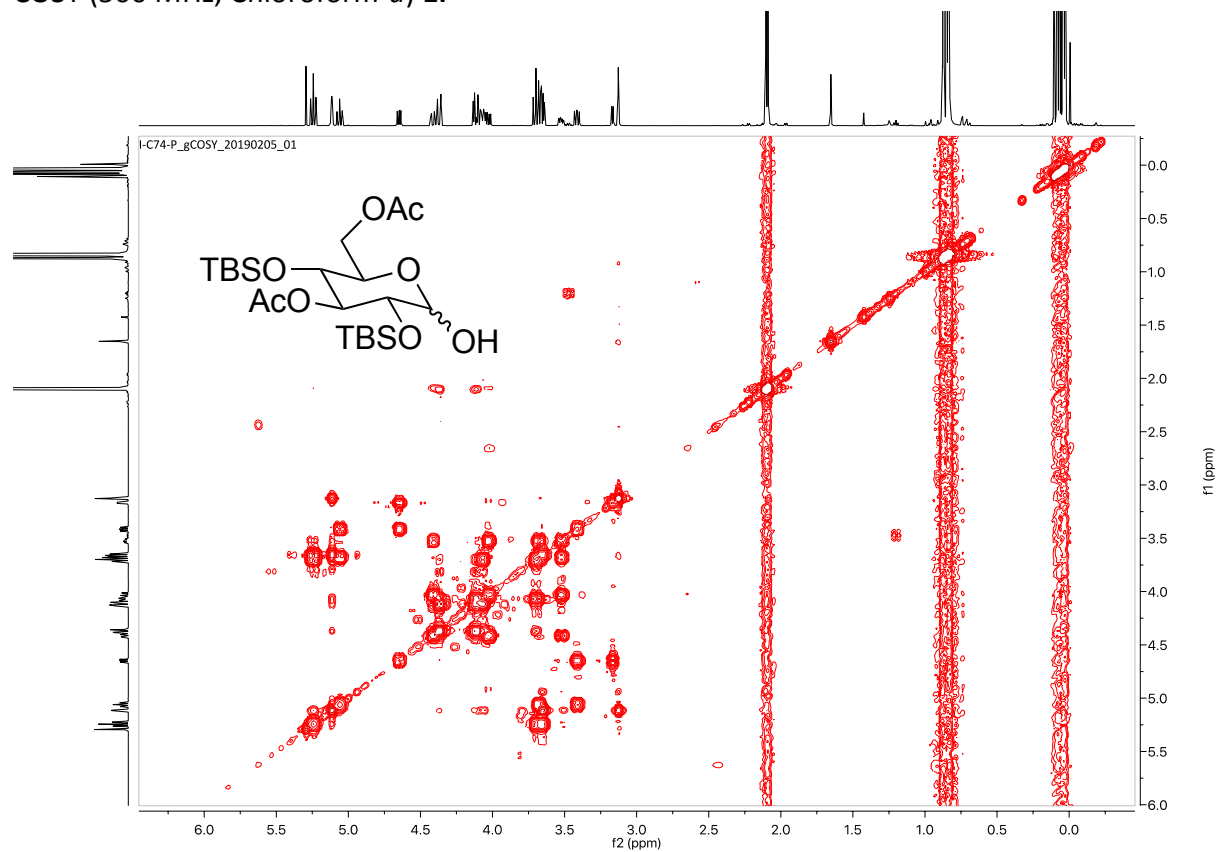

HSQC (500 MHz x 126 MHz, Chloroform-*d*) **1r**

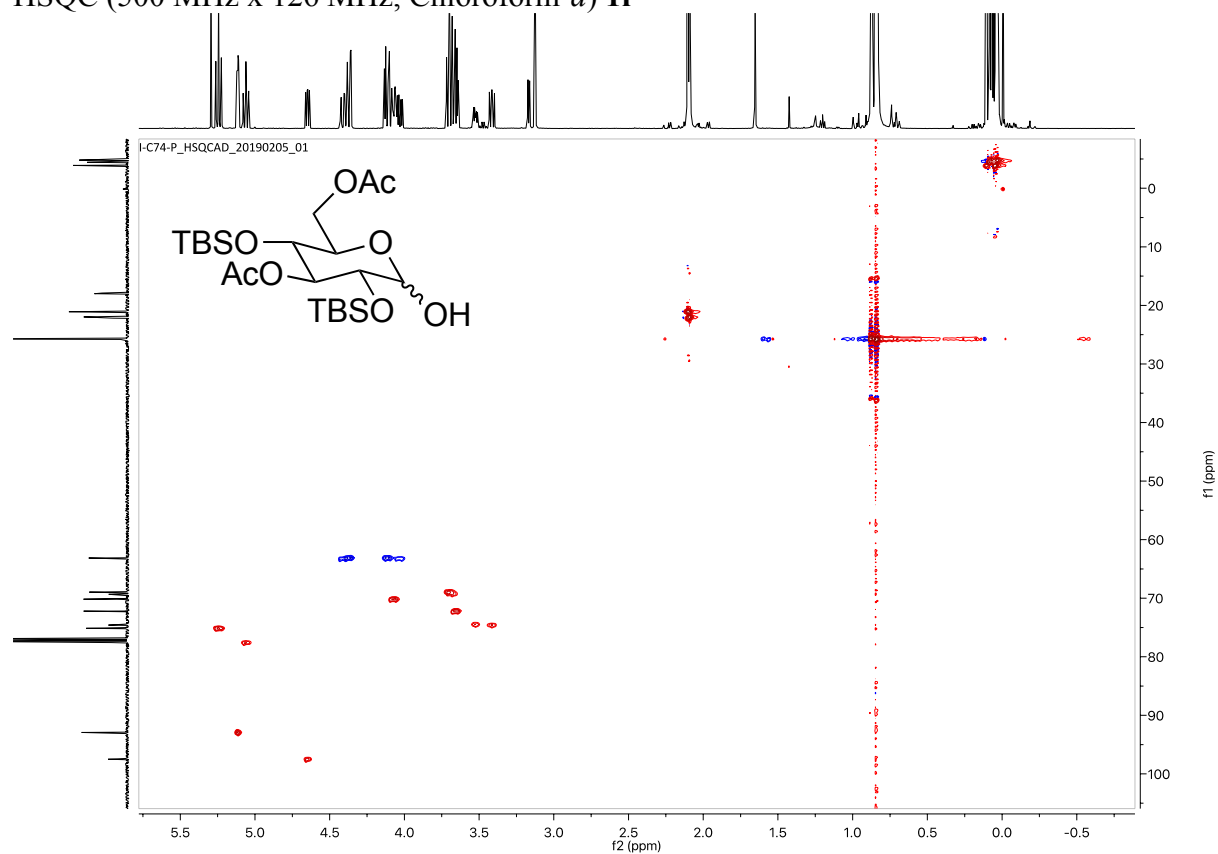

HMBC (500 MHz x 126 MHz, Chloroform-*d*) **1r**

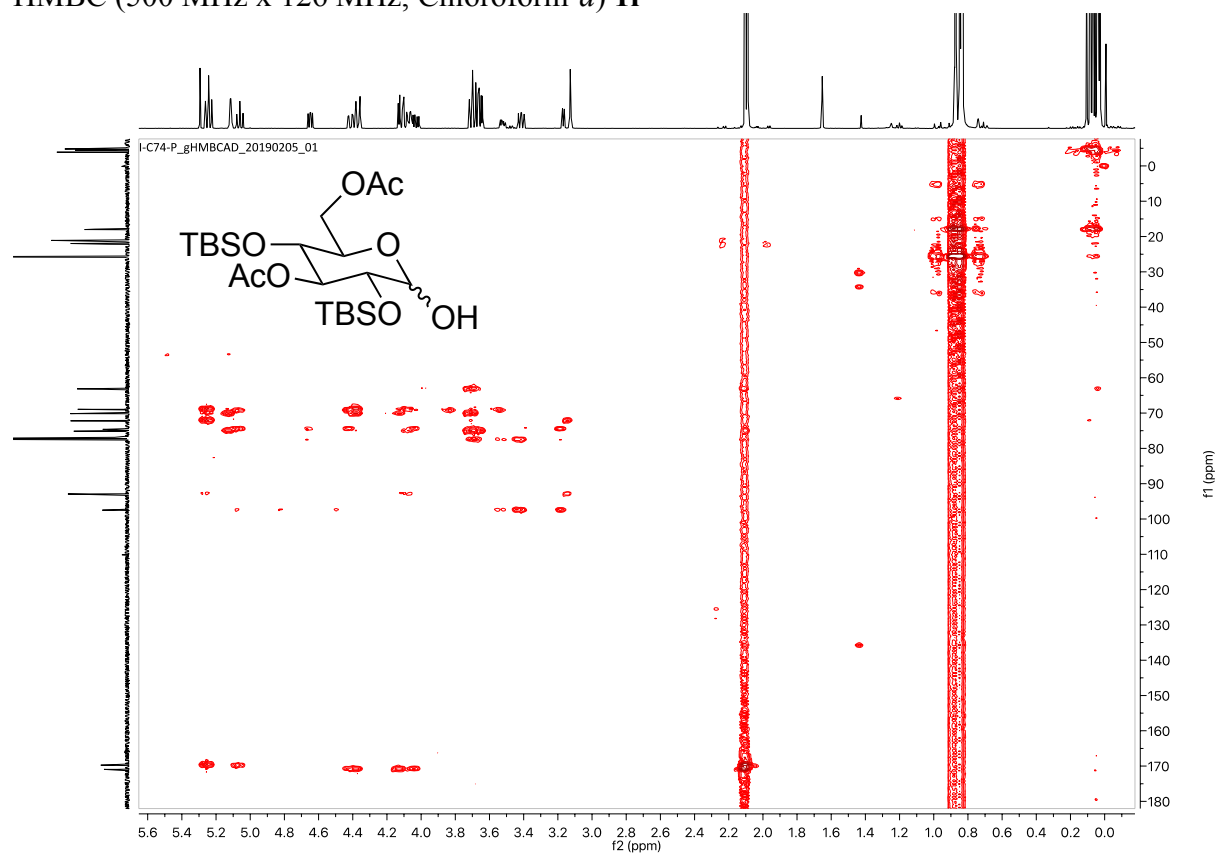

<sup>1</sup>H NMR (500 MHz, Chloroform-*d*) **1s**

1-B91-C\_PROTON\_20181012\_01  
1-B91-C

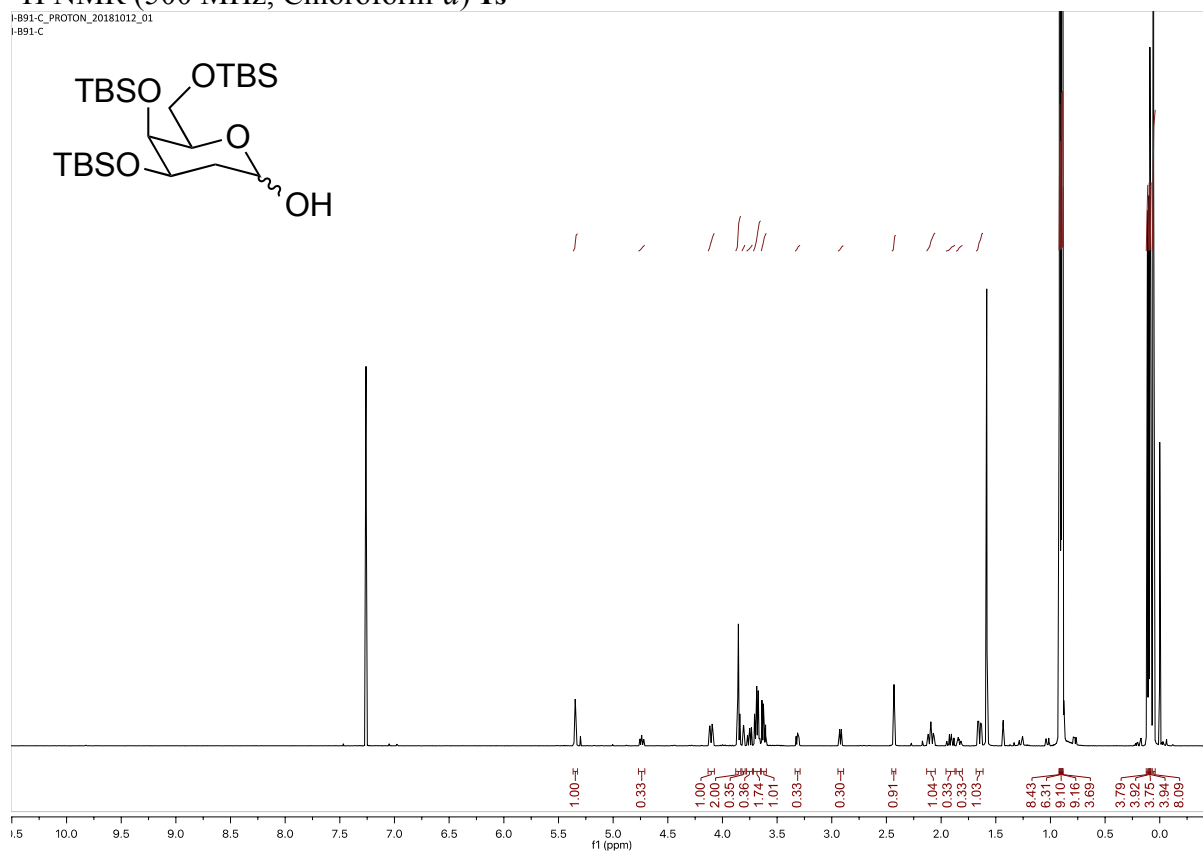

<sup>13</sup>C NMR (101 MHz, Chloroform-*d*) **1s**

1-C28-P CARBON\_20181105\_01  
1-C28-P

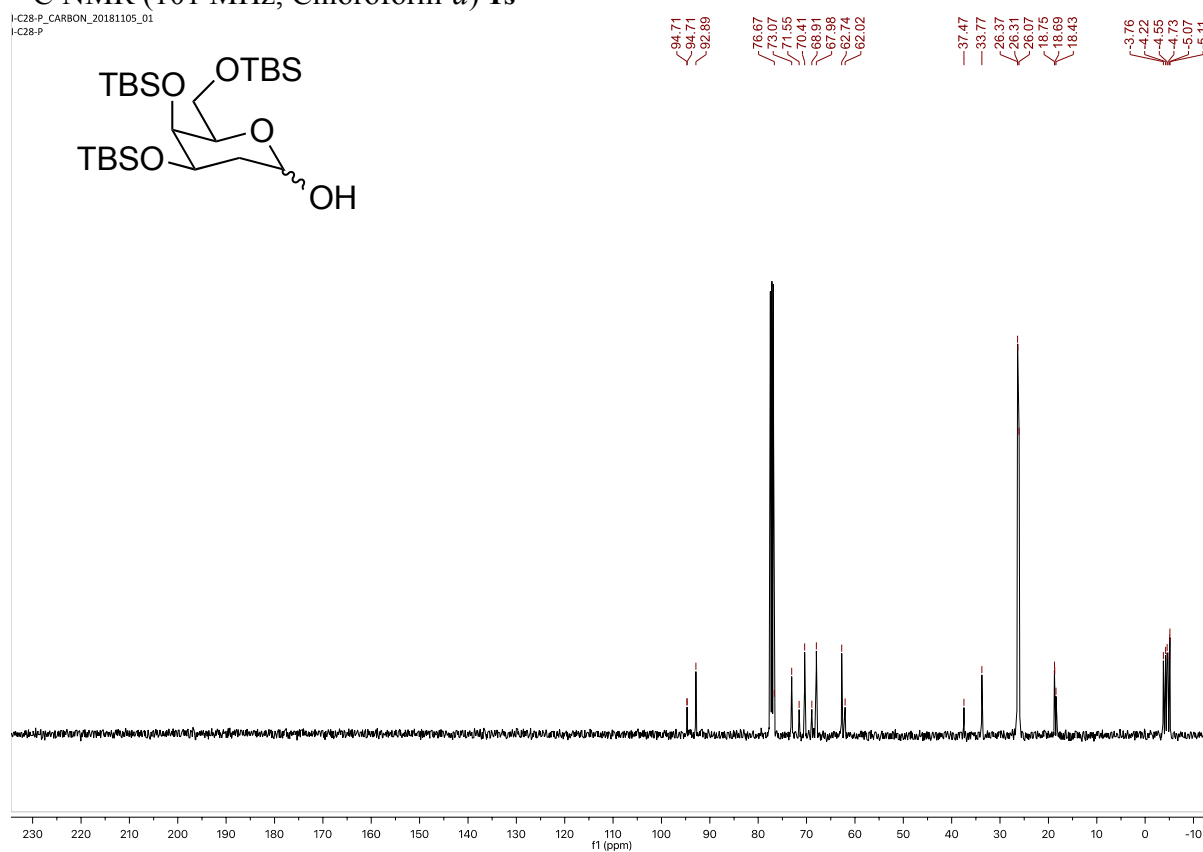

COSY (500 MHz, Chloroform-*d*) **1s**

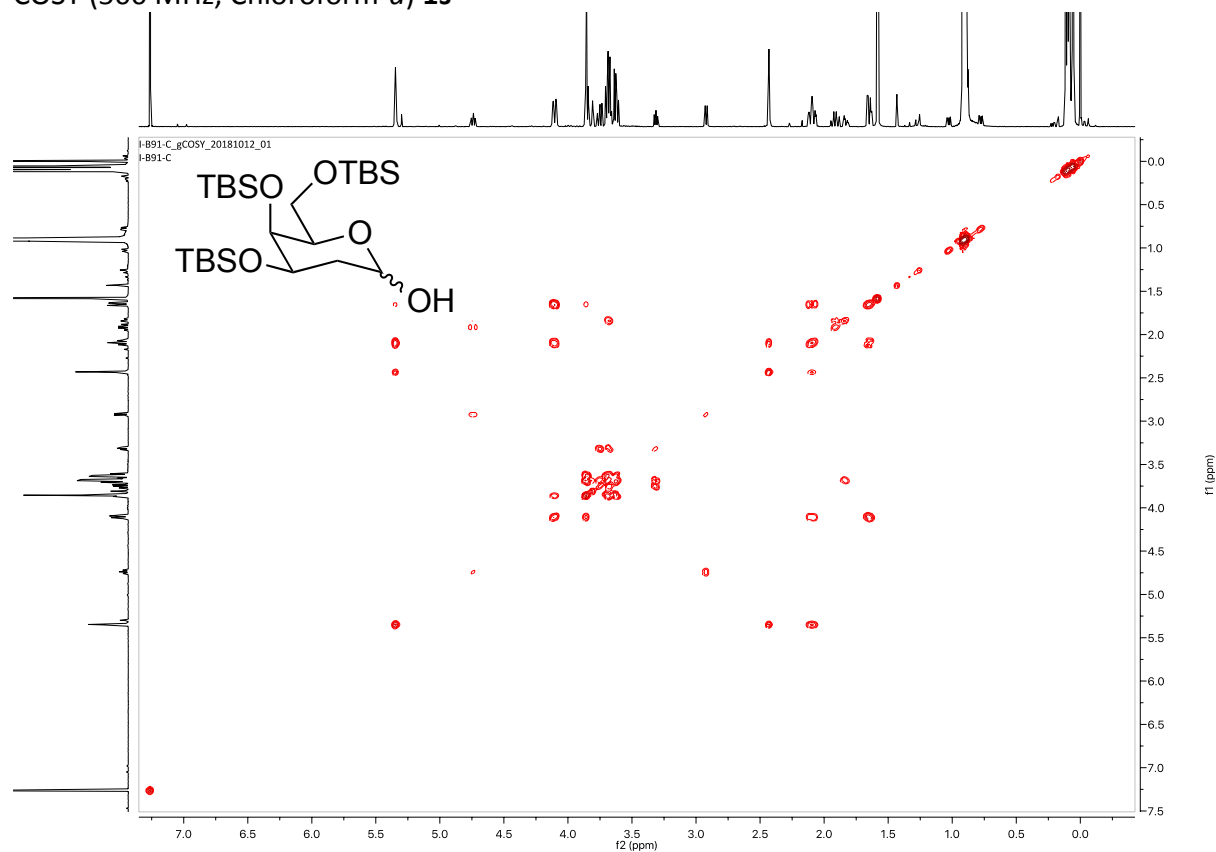

HSQC (500 MHz x 126 MHz, Chloroform-*d*) **1s**

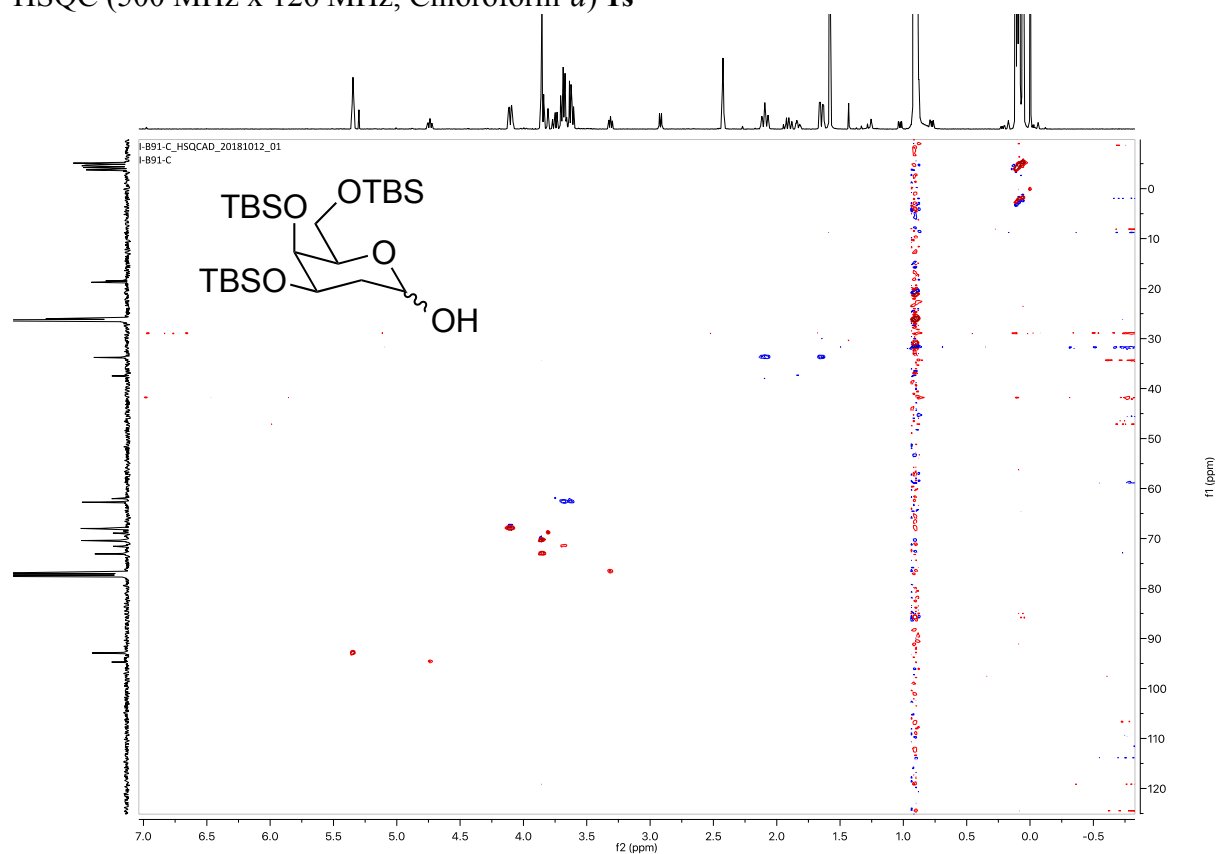

HMBC (500 MHz x 126 MHz, Chloroform-*d*) **1s**

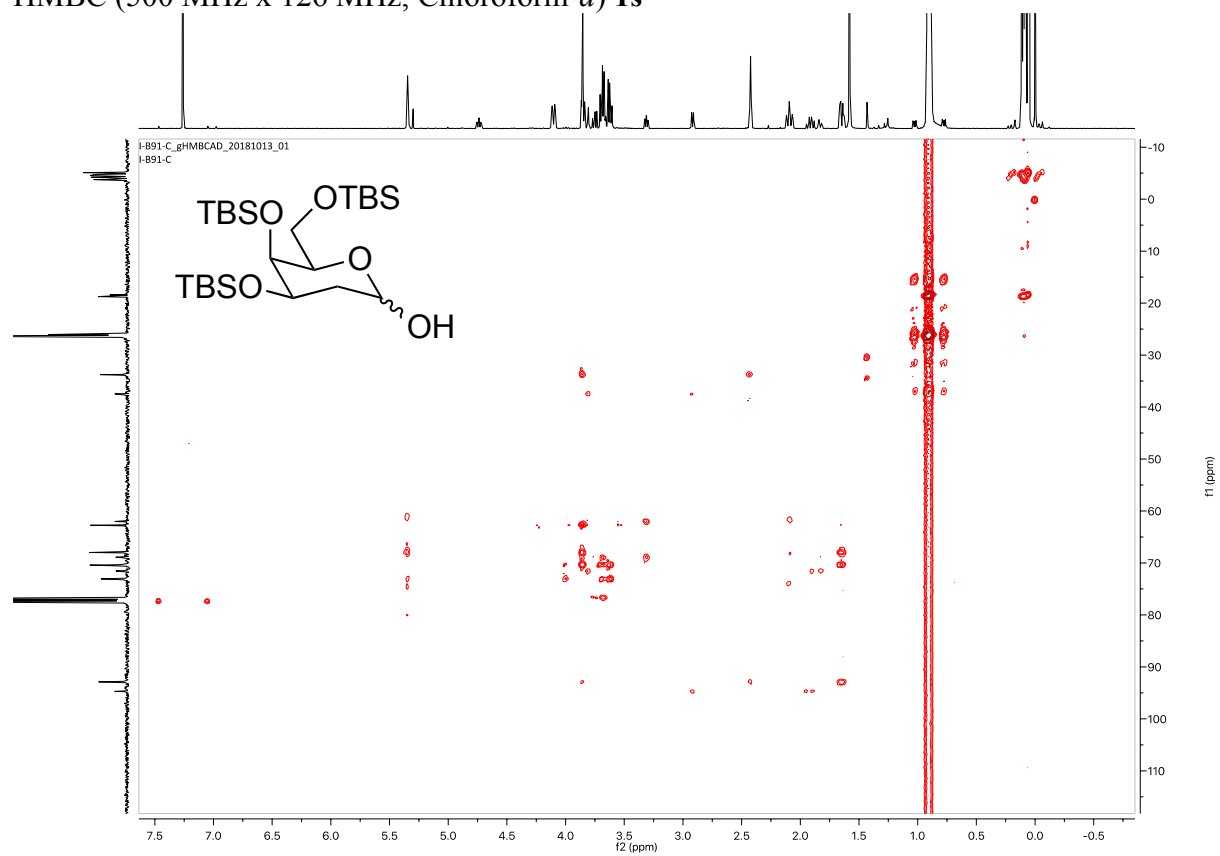

<sup>1</sup>H NMR (500 MHz, Chloroform-*d*; with Me<sub>2</sub>SO<sub>2</sub> as internal standard) **2a**

I-A67-9\_PROTON\_20171122\_01  
I-A67-9  
Bn Glucose

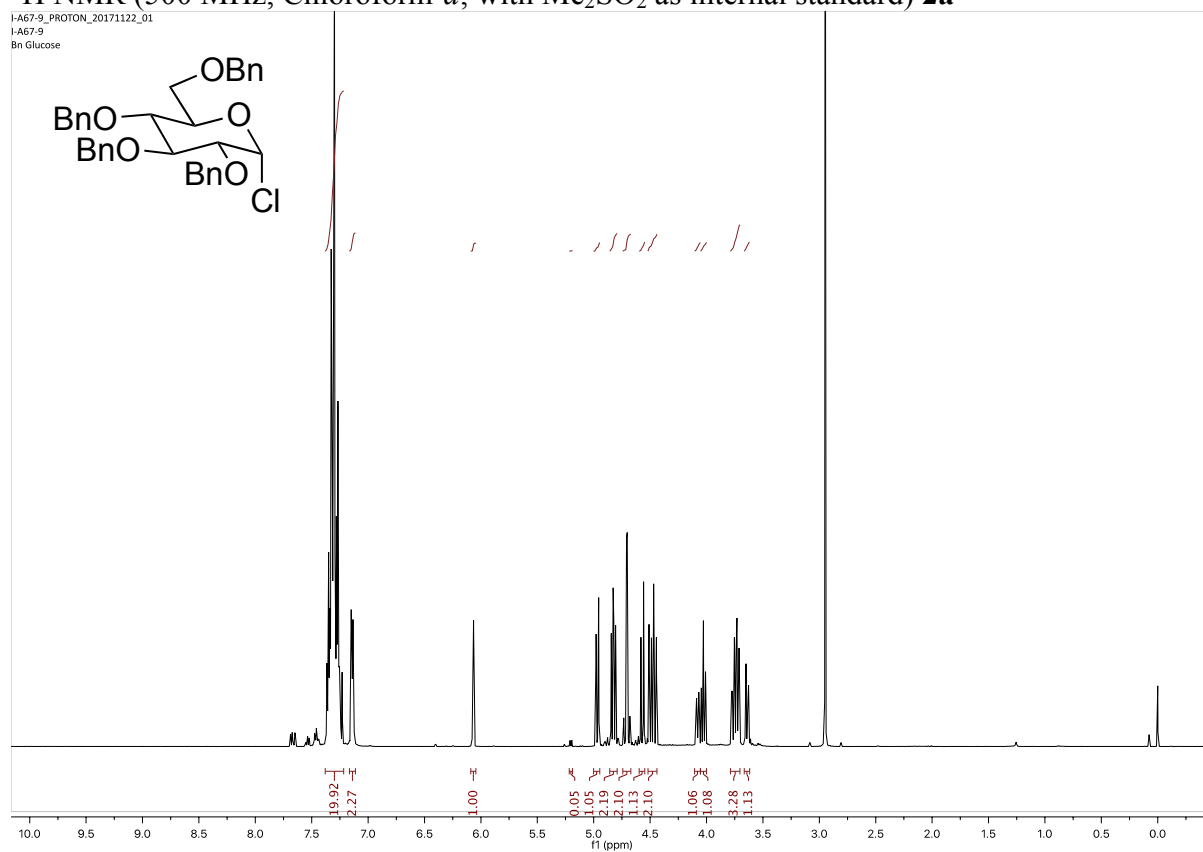

<sup>13</sup>C NMR (101 MHz, Chloroform-*d*; with Me<sub>2</sub>SO<sub>2</sub> as internal standard) **2a**

I-A67-9-carbon\_20171123\_01  
I-A67-9-carbon  
Bn Glucose

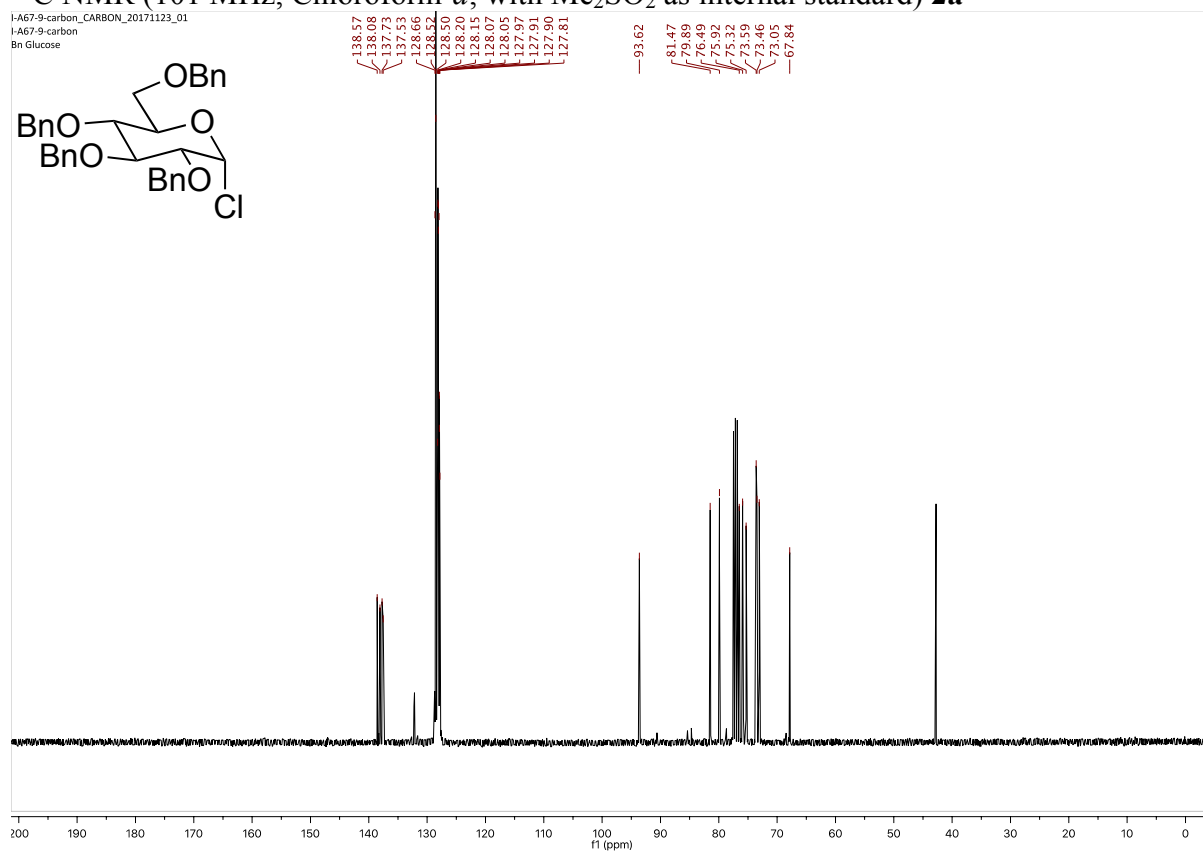

<sup>1</sup>H NMR (500 MHz, Chloroform-*d*, with Me<sub>2</sub>SO<sub>2</sub>) **2b**

I-A67-6\_PROTON\_20171122\_01  
I-A67-6  
Bn Galactose

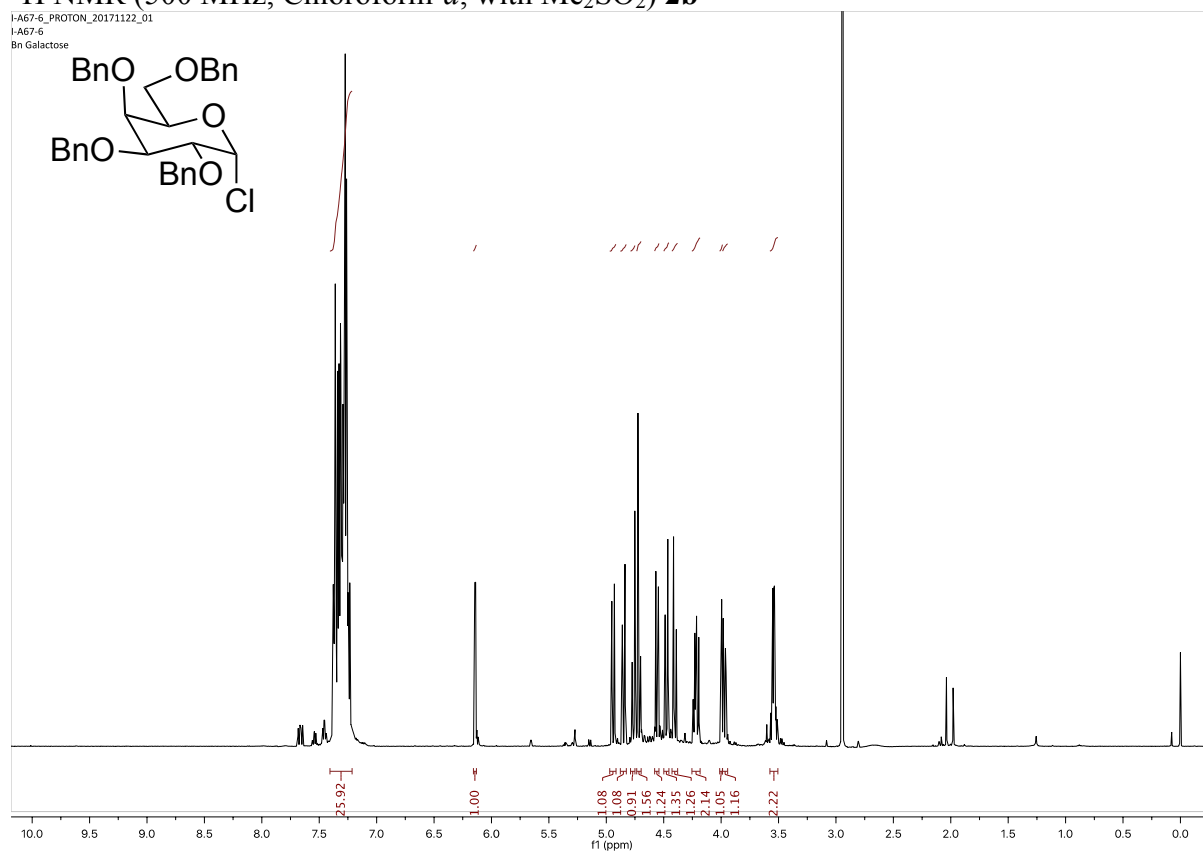

<sup>13</sup>C NMR (101 MHz, Chloroform-*d*, with Me<sub>2</sub>SO<sub>2</sub>) **2b**

I-A67-6-carbon\_CARBON\_20171122\_01  
I-A67-6-carbon  
Bn Galactose

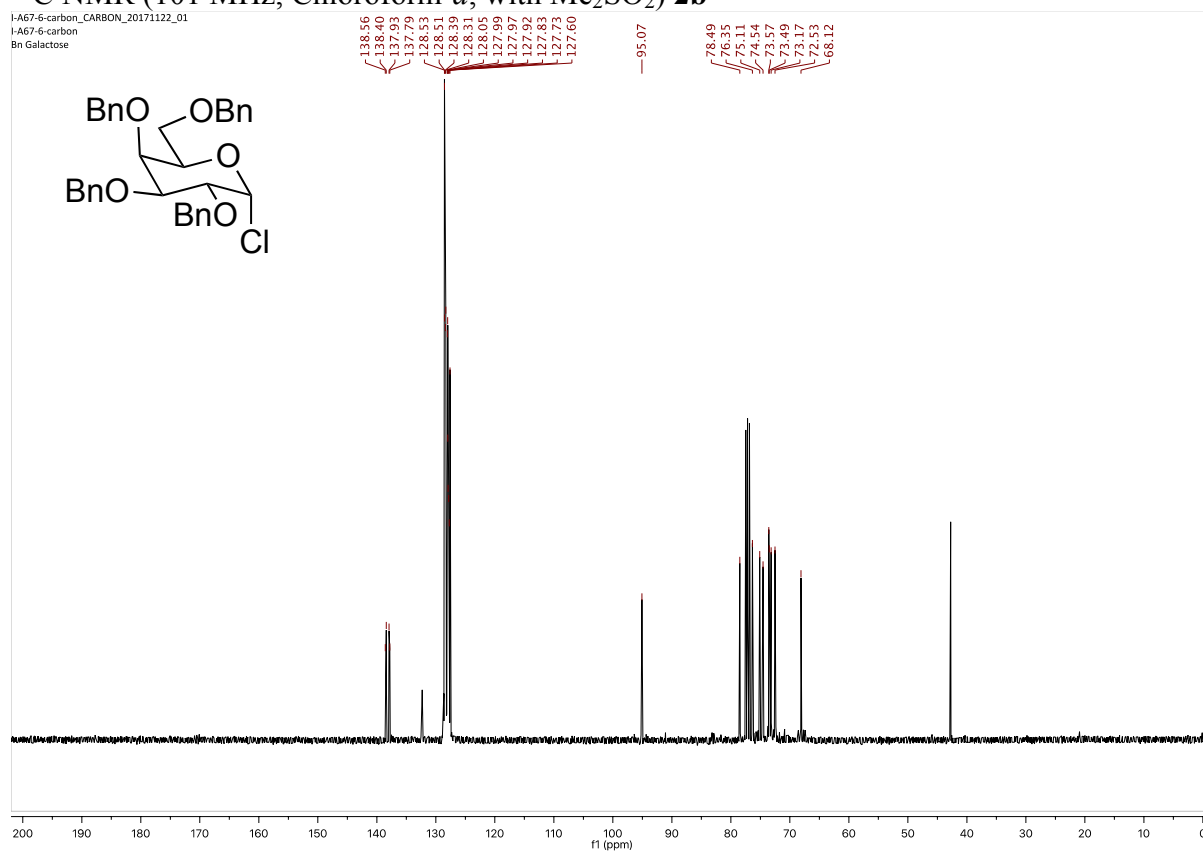

<sup>1</sup>H NMR (500 MHz, Chloroform-*d*, with Me<sub>2</sub>SO<sub>2</sub>) **2c**

I-A67-S-PROTON\_20171122\_01

I-A67-S

Bn Mannose

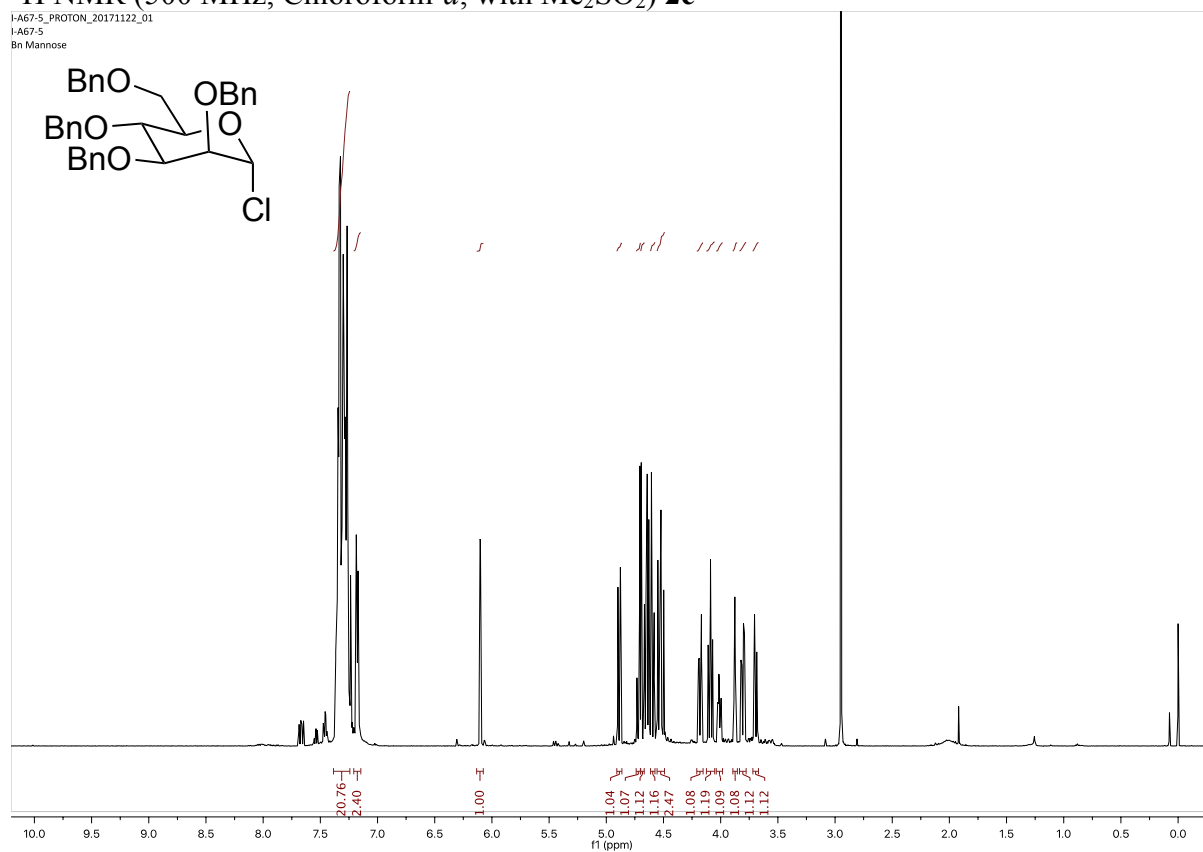

<sup>13</sup>C NMR (101 MHz, Chloroform-*d*, with Me<sub>2</sub>SO<sub>2</sub>) **2c**

I-A67-S-carbon\_20171122\_01

I-A67-S-carbon

Bn Mannose

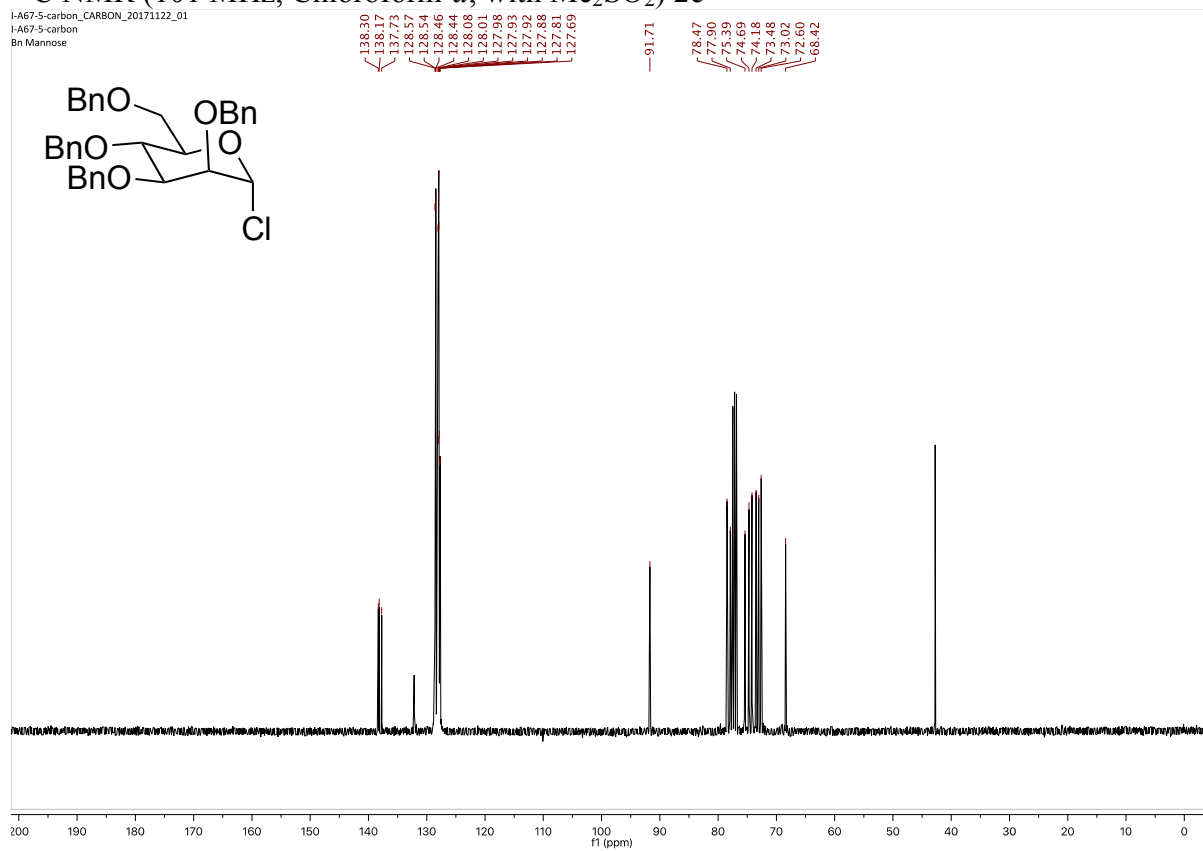

<sup>1</sup>H NMR (400 MHz, Chloroform-*d*, with Me<sub>2</sub>SO<sub>2</sub>) **2d**

I-A68-1\_PROTON\_20171205\_01  
I-A68-1  
Bn Deoxy Glu

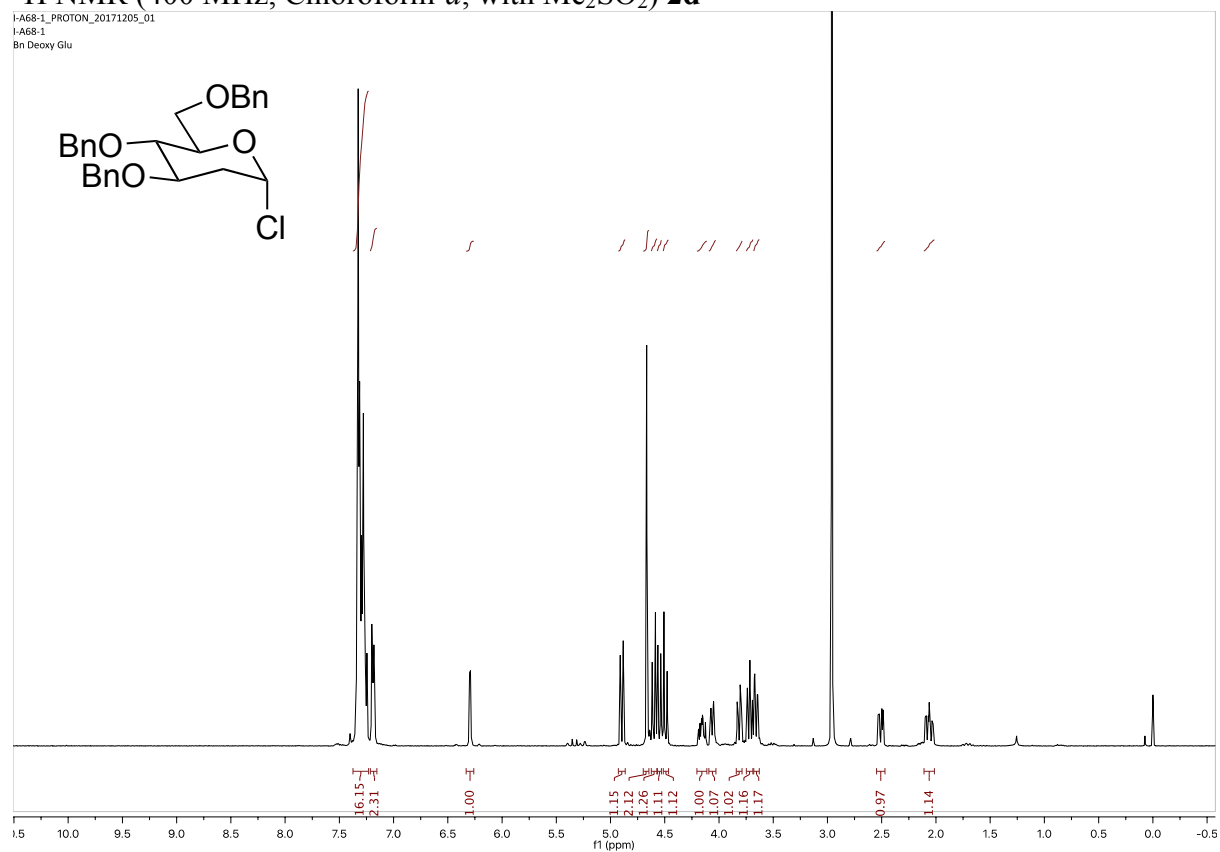

<sup>13</sup>C NMR (101 MHz, Chloroform-*d*, with Me<sub>2</sub>SO<sub>2</sub>) **2d**

I-A68-1\_CARBON\_20171205\_01  
I-A68-1  
Bn Deoxy Glu

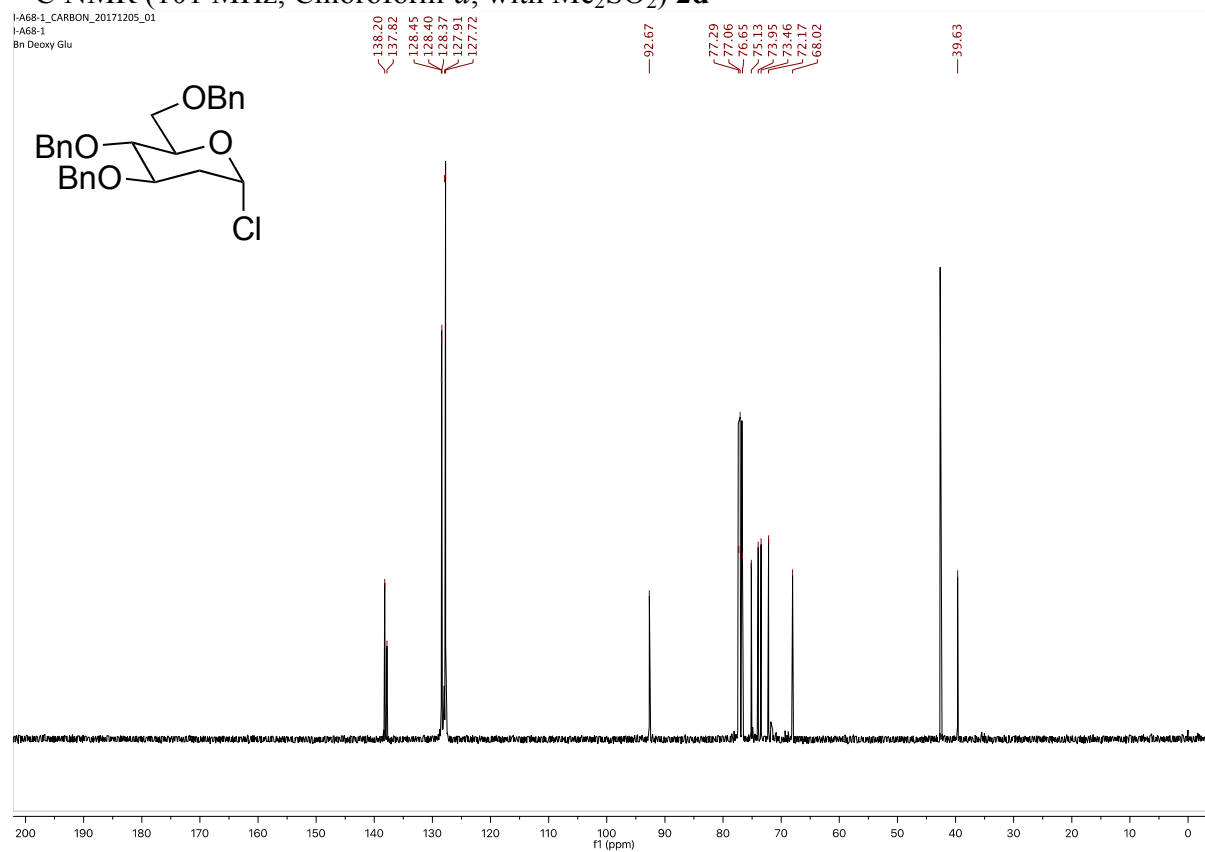

<sup>1</sup>H NMR (500 MHz, Chloroform-*d*, with Me<sub>2</sub>SO<sub>2</sub>) **2e**

I-A68-2-500\_PROTON\_20171206\_01  
I-A68-2-500  
Bn Deoxy Gal

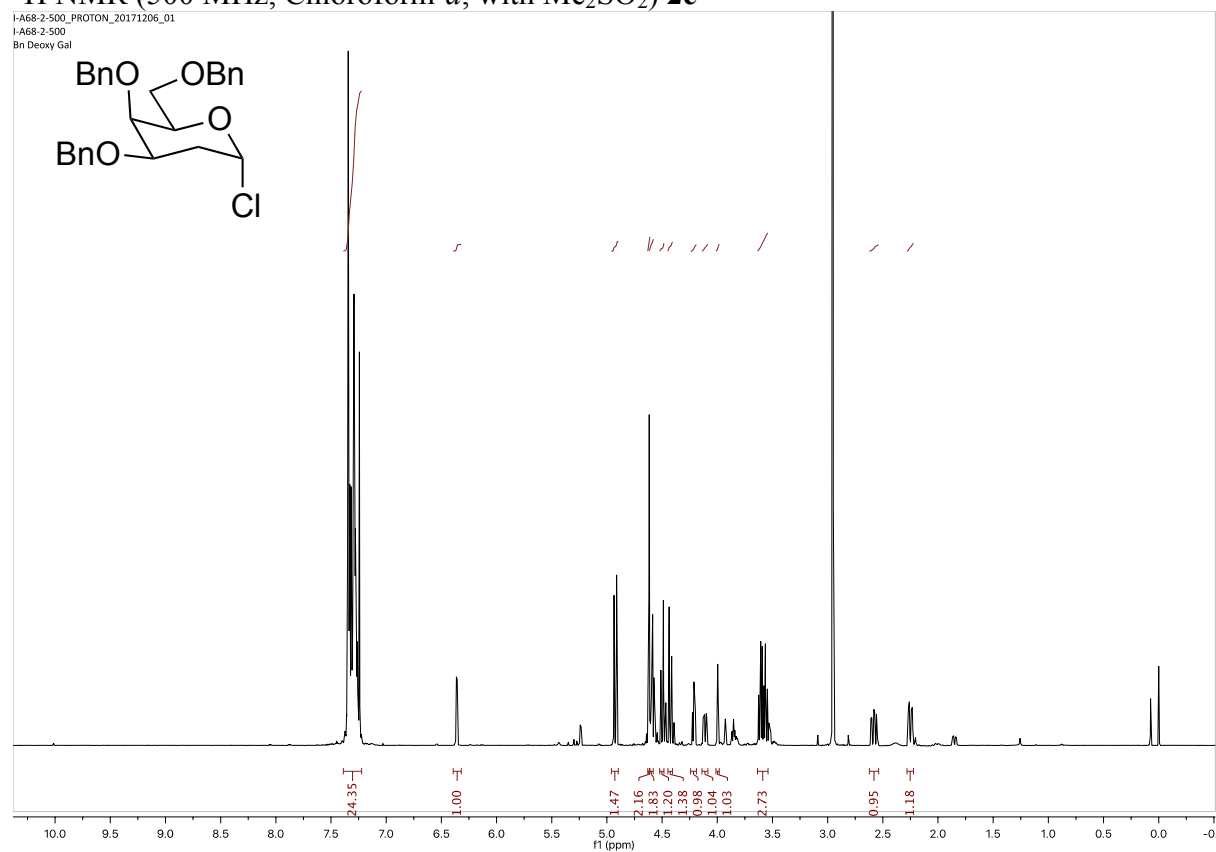

<sup>13</sup>C NMR (101 MHz, Chloroform-*d*, with Me<sub>2</sub>SO<sub>2</sub>) **2e**

I-A68-2\_CARBON\_20171205\_01  
I-A68-2  
Bn Deoxy Gal

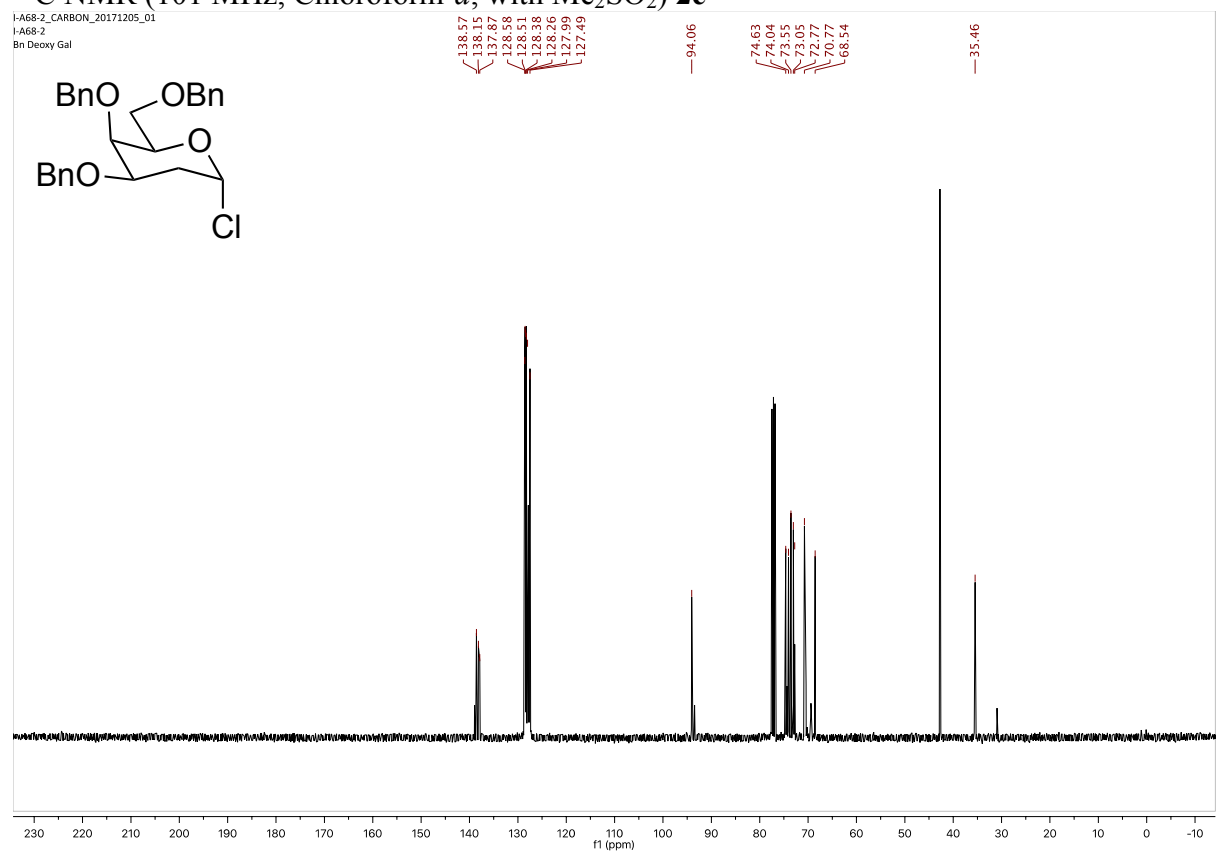

<sup>1</sup>H NMR (500 MHz, Chloroform-*d*, with Me<sub>2</sub>SO<sub>2</sub>) **2f**

I-A67-3\_PROTON\_20171123\_01  
I-A67-3  
Ac Deoxy Glucose

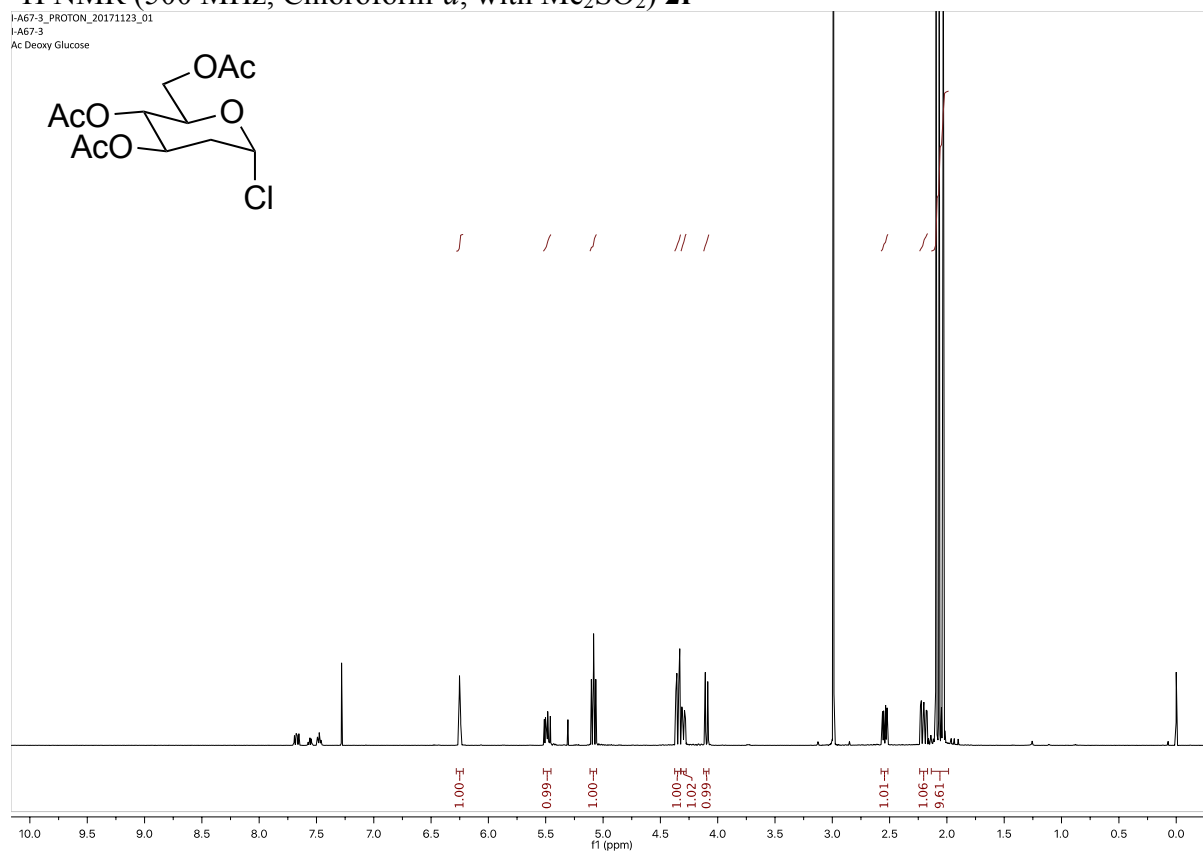

<sup>13</sup>C NMR (101 MHz, Chloroform-*d*, with Me<sub>2</sub>SO<sub>2</sub>) **2f**

I-A67-3\_CARBON\_20171124\_01  
I-A67-3  
Ac Deoxy Glucose

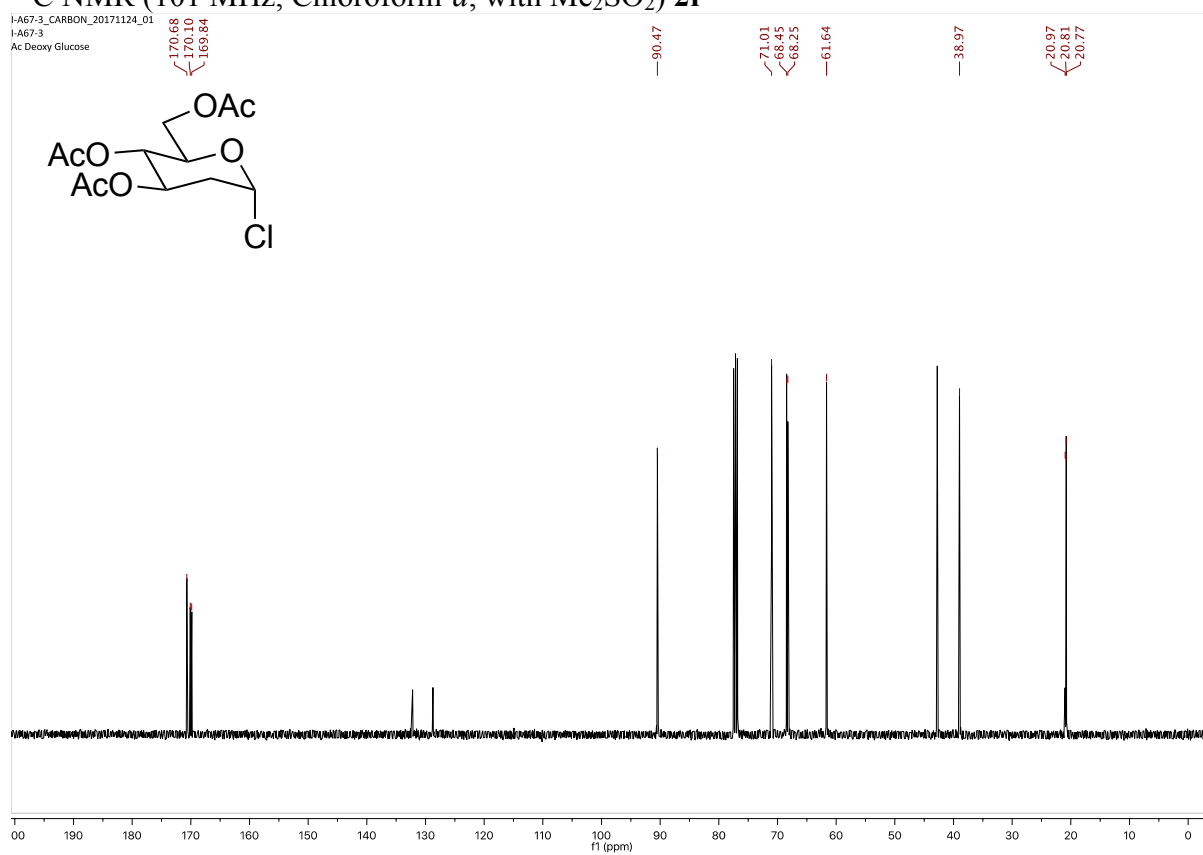

<sup>1</sup>H NMR (500 MHz, Chloroform-*d*, with Me<sub>2</sub>SO<sub>2</sub>) **2g**

I-C35-P\_PROTON\_20181101\_01  
I-C35-P

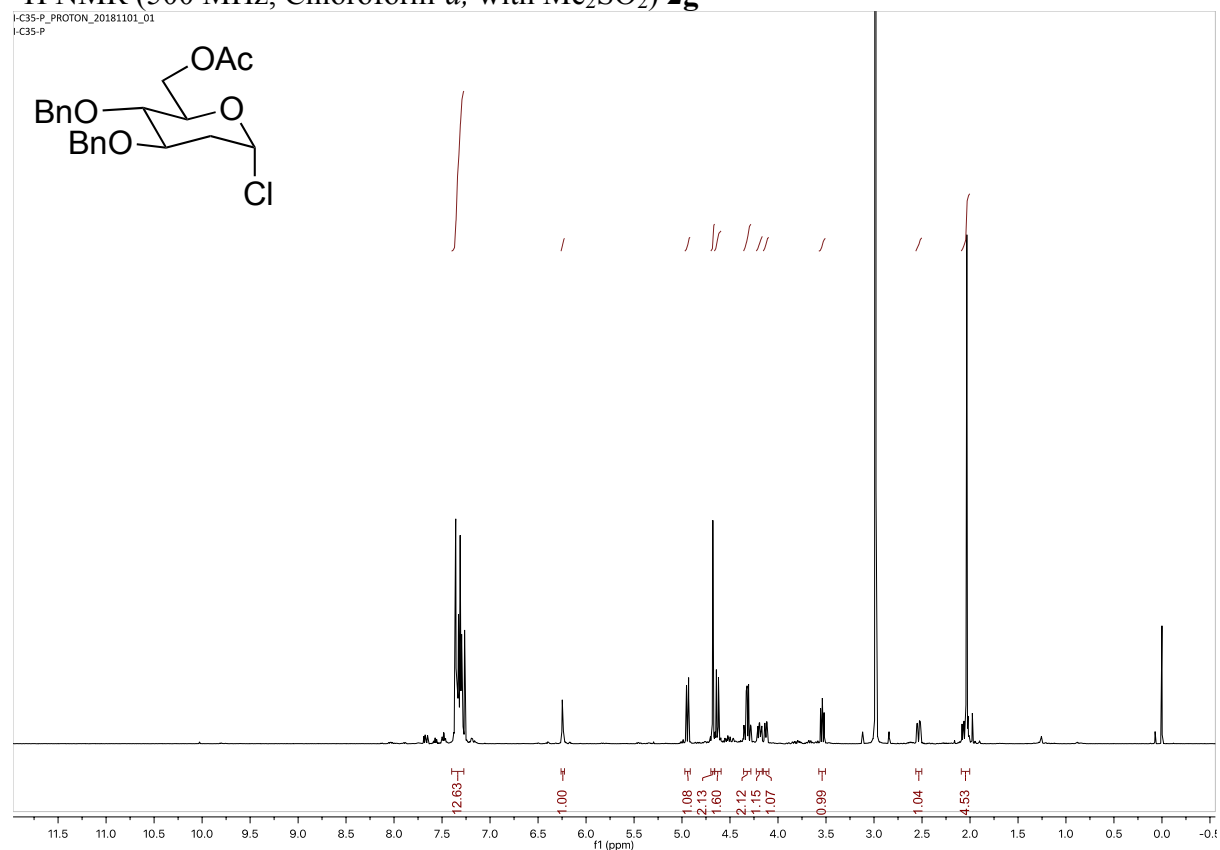

<sup>13</sup>C NMR (101 MHz, Chloroform-*d*, with Me<sub>2</sub>SO<sub>2</sub>) **2g**

I-C35-P CARBON\_20181101\_01  
I-C35-P

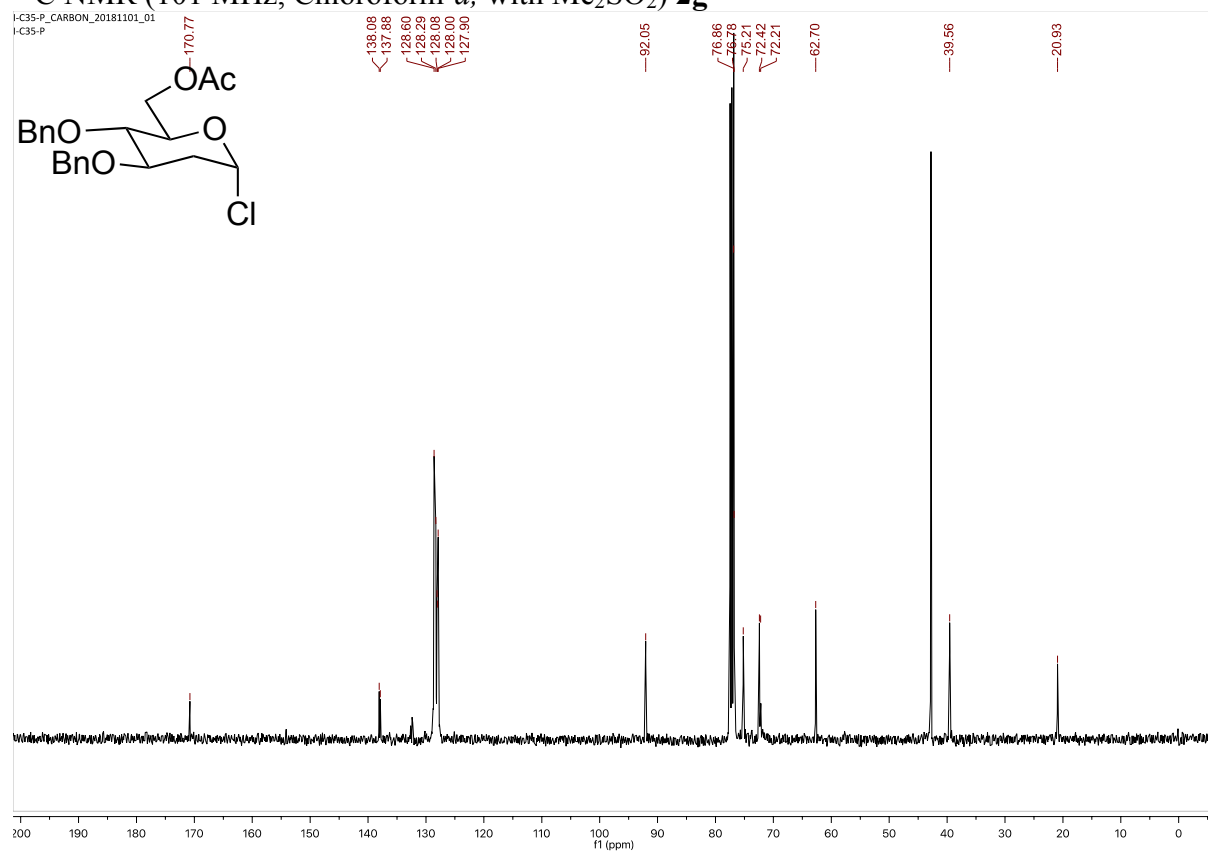

COSY (400 MHz, Chloroform-*d*) **2g**

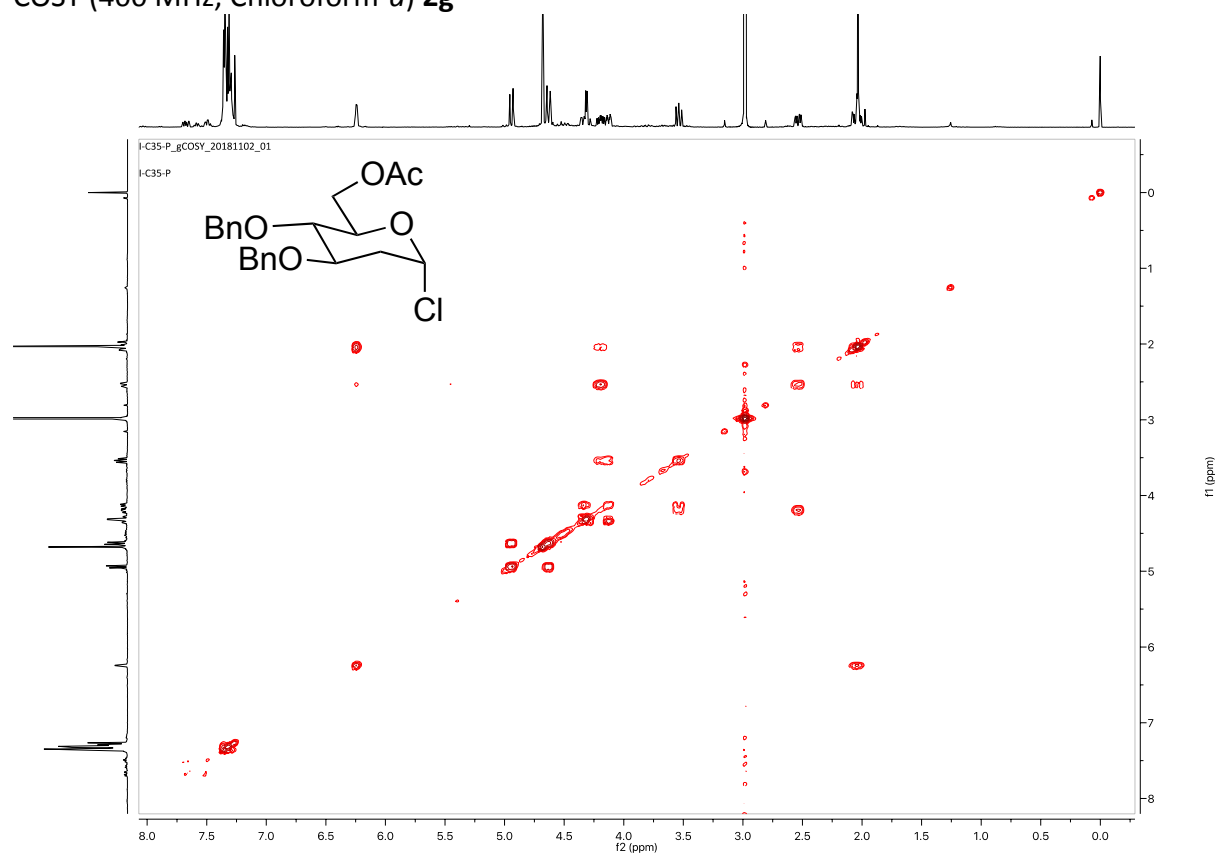

$^{13}\text{C}$  -  $^1\text{H}$  coupled HSQC (400 MHz x 101 MHz, Chloroform-*d*) **2g**

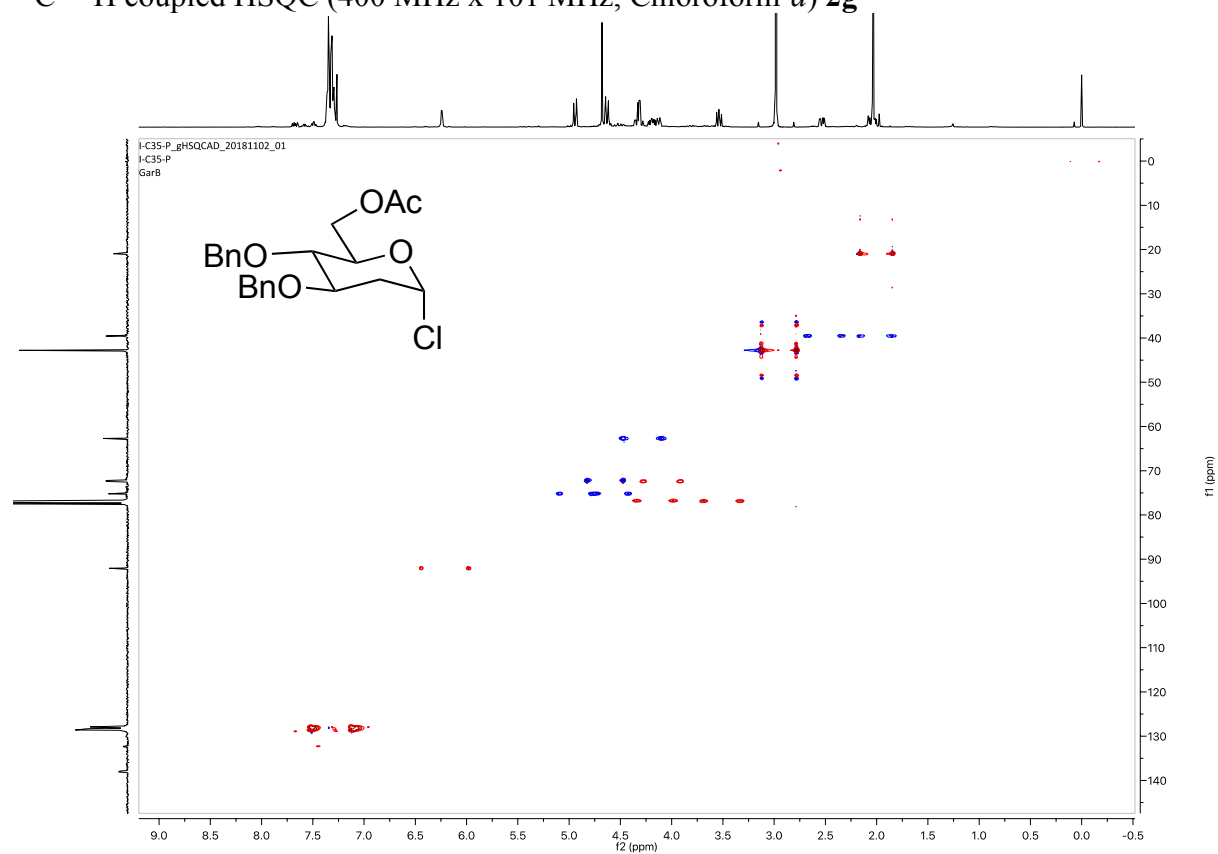

<sup>1</sup>H NMR (400 MHz, Chloroform-*d*, with Me<sub>2</sub>SO<sub>2</sub>) **2h**

I-C85-proton\_PROTON\_20190210\_01

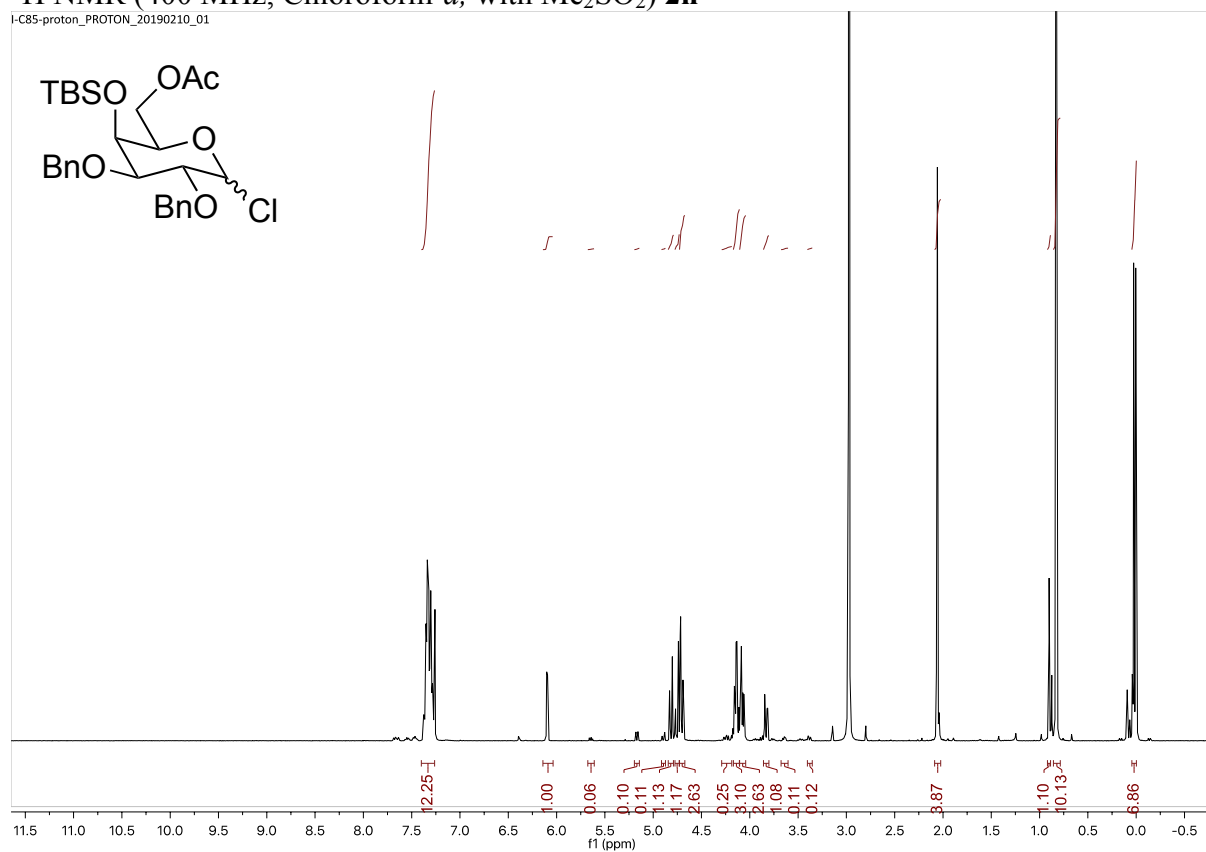

<sup>13</sup>C NMR (101 MHz, Chloroform-*d*, with Me<sub>2</sub>SO<sub>2</sub>) **2h**

I-C85-P CARBON\_20190210\_01

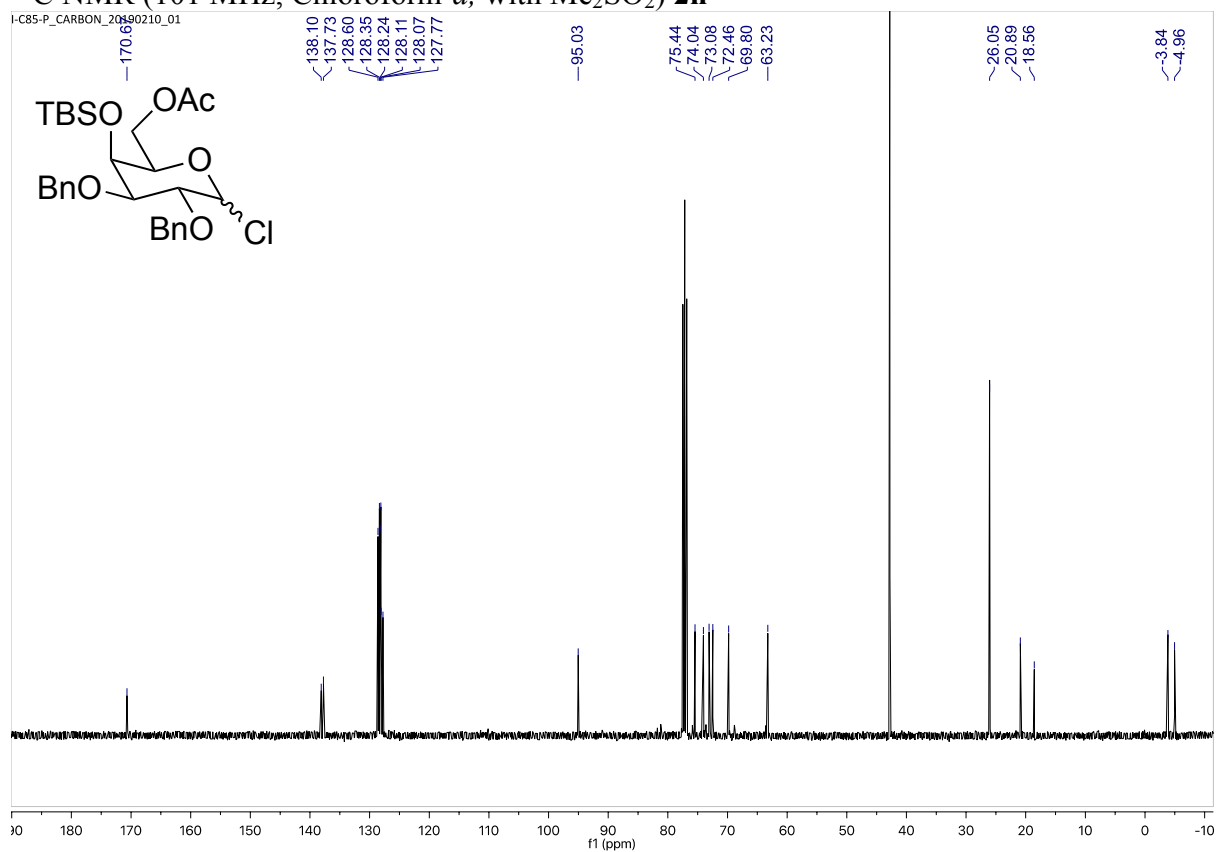

COSY (400 MHz, Chloroform-*d*) **2h**

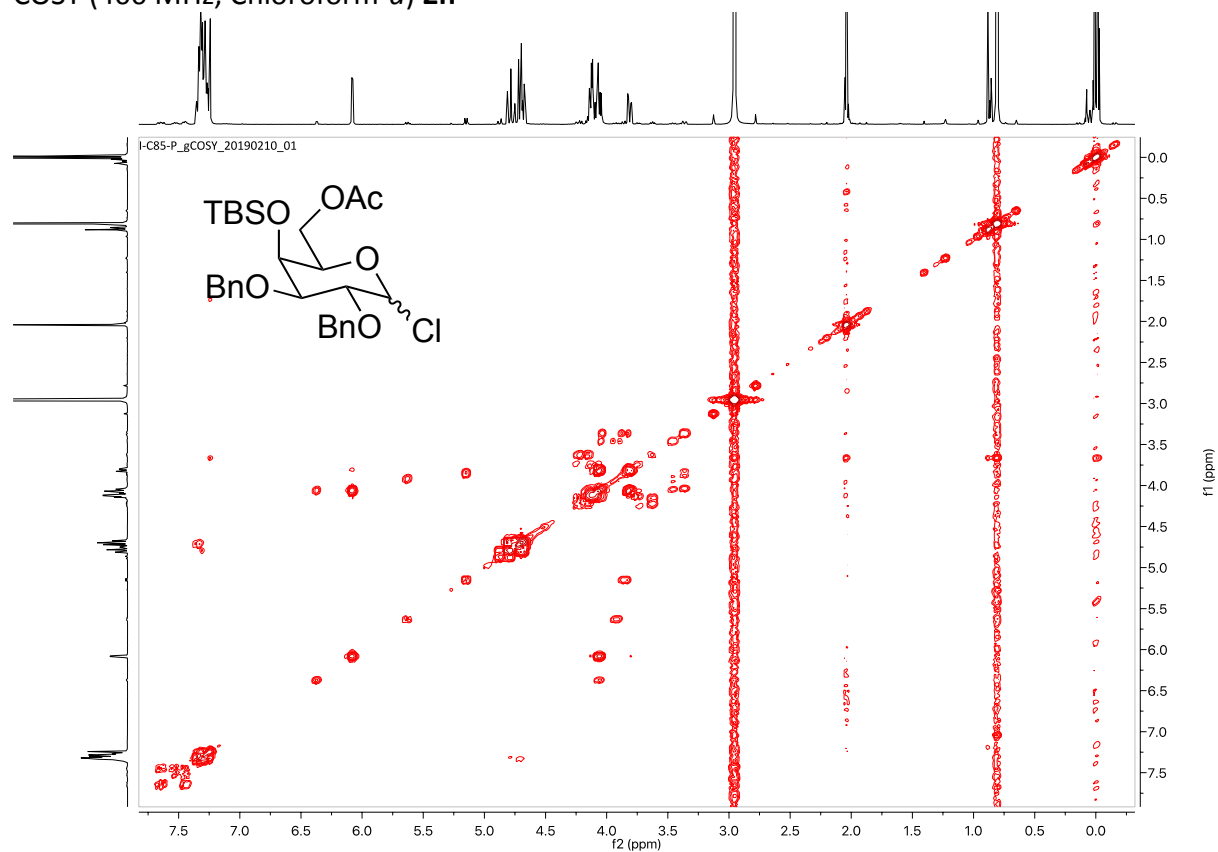

<sup>13</sup>C - <sup>1</sup>H decoupled HSQC (400 MHz x 101 MHz, Chloroform-*d*) **2h**

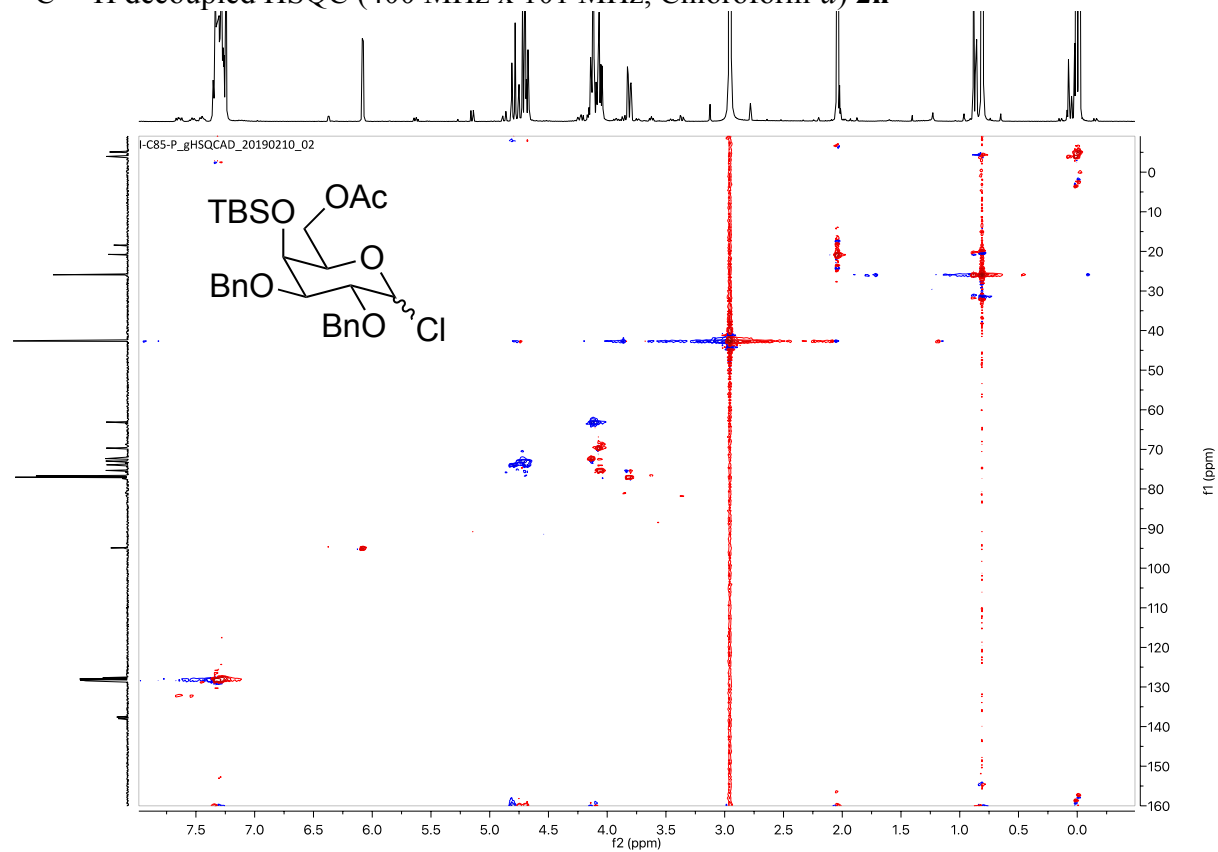

$^{13}\text{C}$  -  $^1\text{H}$  coupled HSQC (400 MHz x 101 MHz, Chloroform-*d*) **2h**

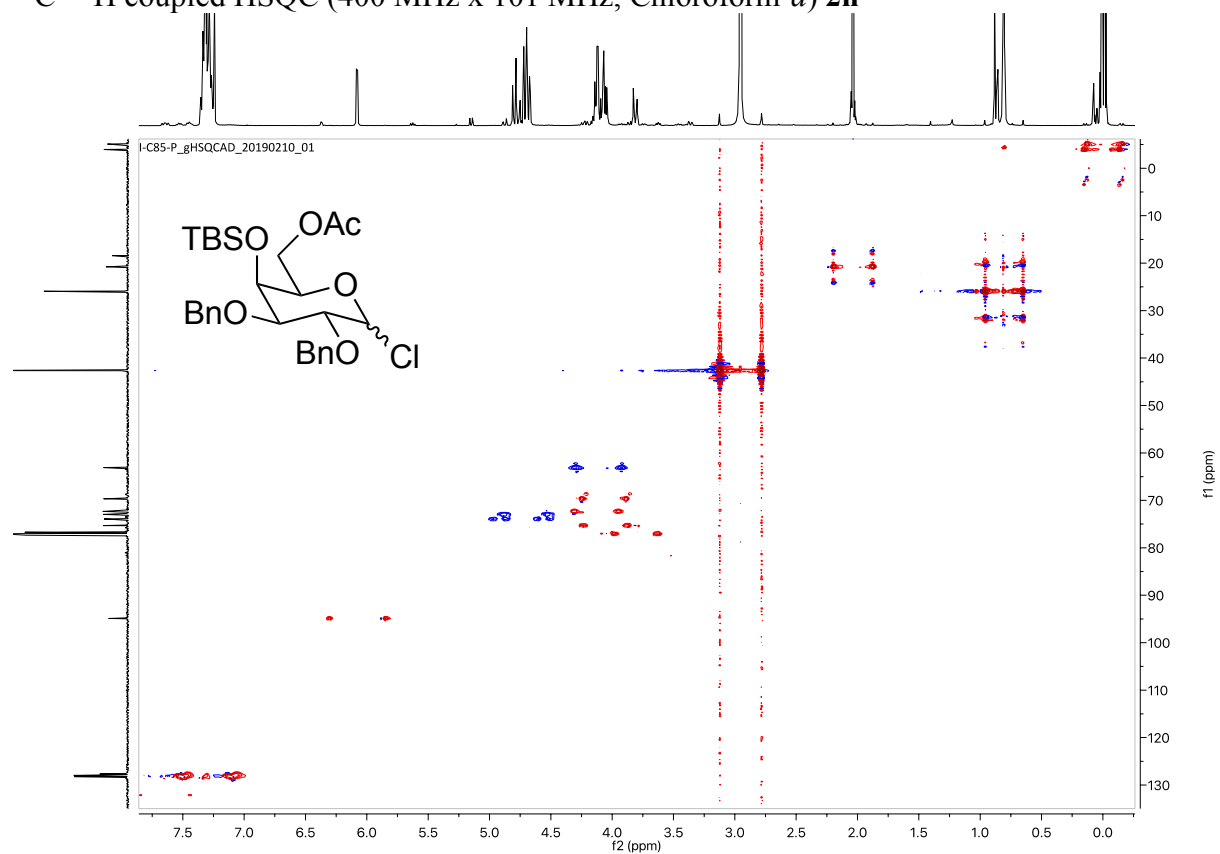

HMBC (400 MHz x 101 MHz, Chloroform-*d*) **2h**

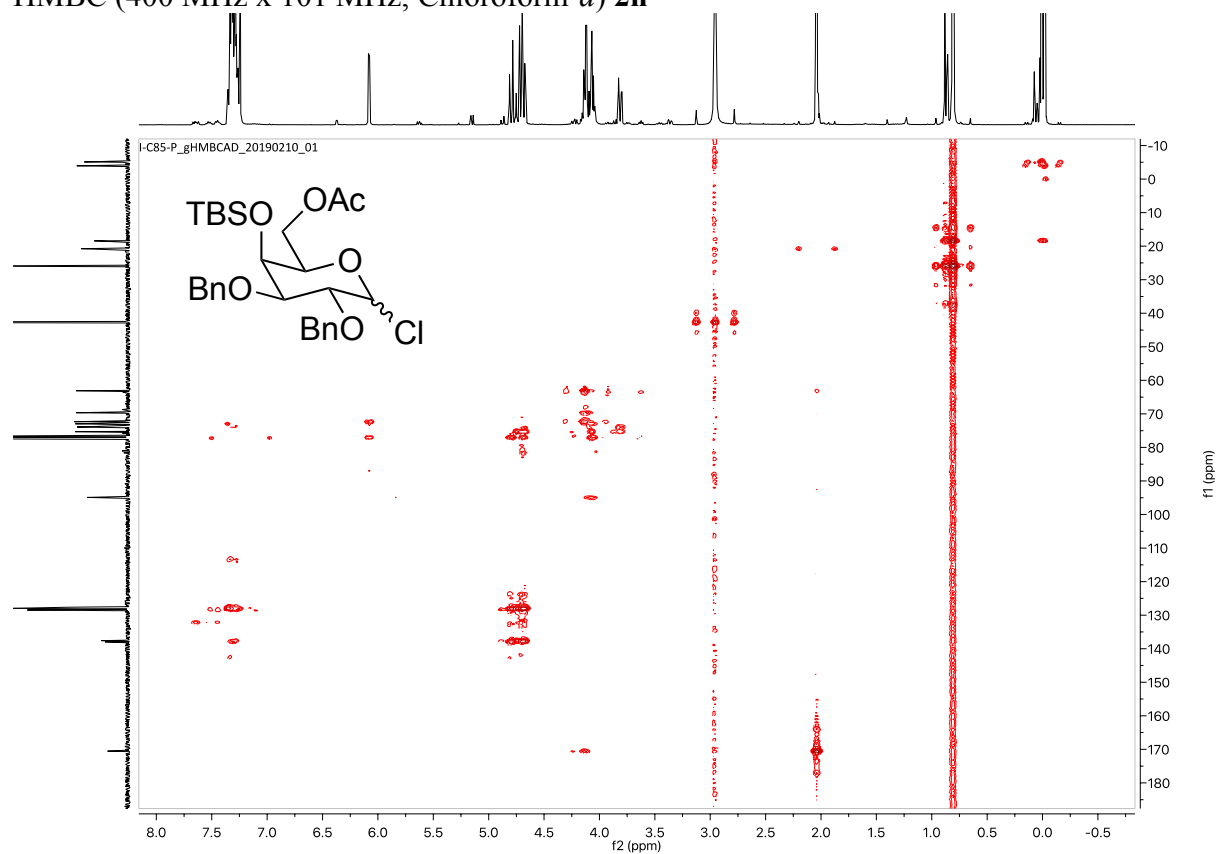

<sup>1</sup>H NMR (500 MHz, Chloroform-*d*, with Me<sub>2</sub>SO<sub>2</sub>) **2i**

I-A67-7\_PROTON\_20171123\_01

I-A67-7  
Bz Glucose

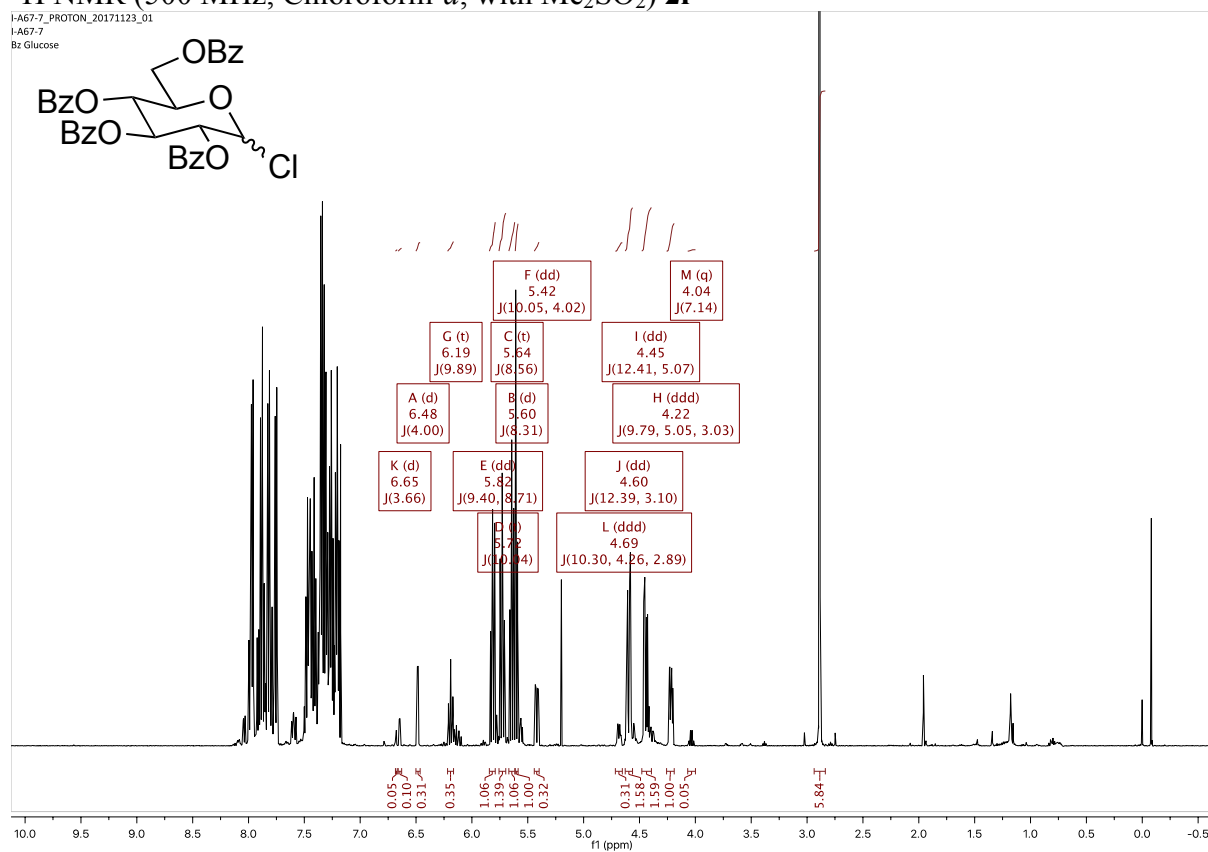

<sup>13</sup>C NMR (101 MHz, Chloroform-*d*, with Me<sub>2</sub>SO<sub>2</sub>) **2i**

I-A67-7\_CARBON\_20171124\_01

I-A67-7  
Bz Glucose

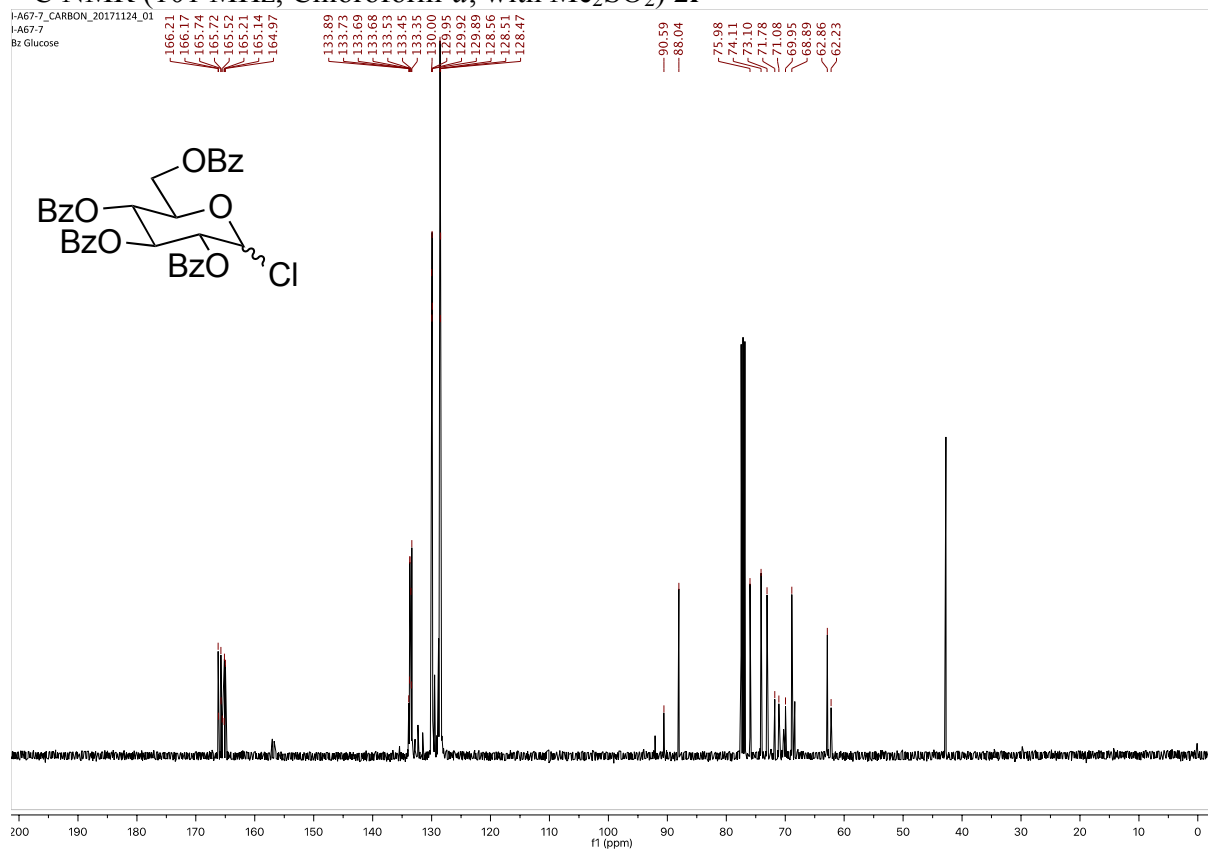

<sup>1</sup>H NMR (400 MHz, Chloroform-*d*, with Me<sub>2</sub>SO<sub>2</sub>) **2j**

I-C40-P\_PROTON\_20181102\_01  
I-C40-P  
Benzylidene

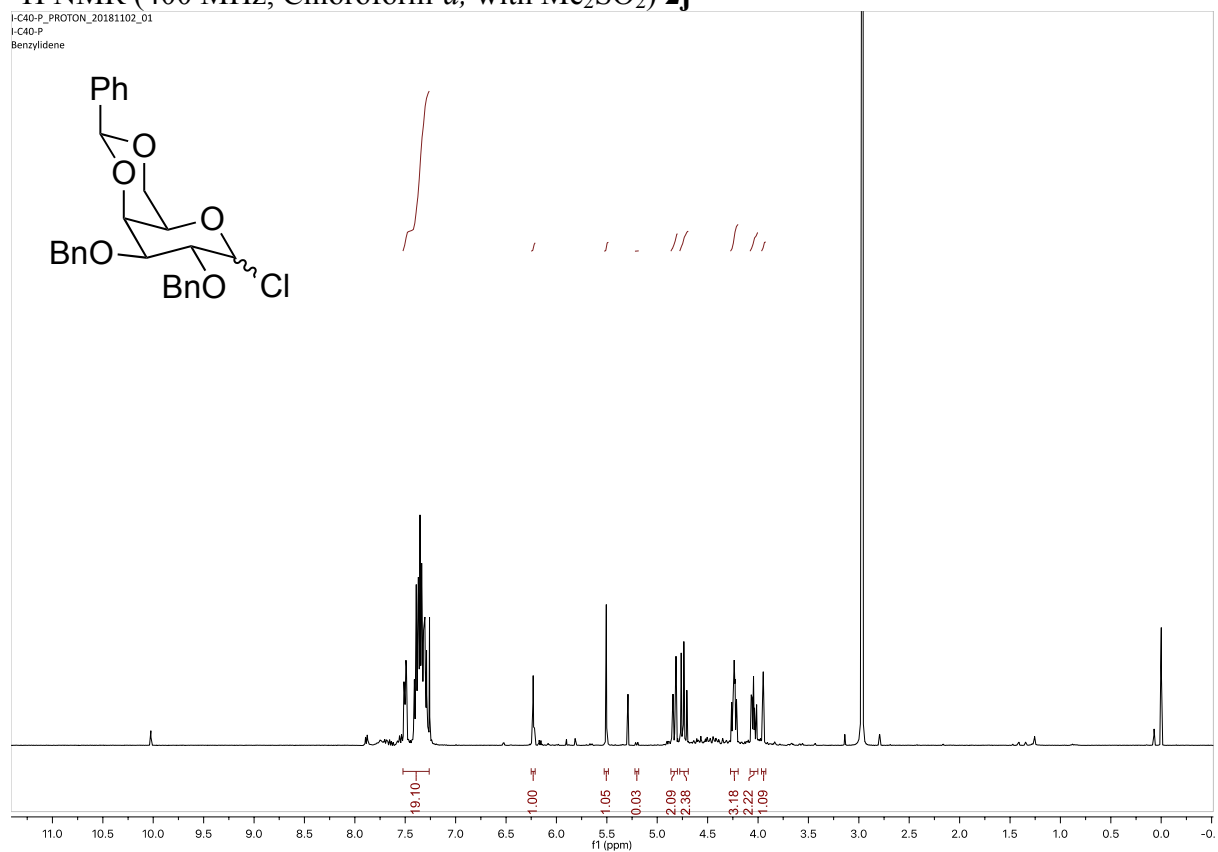

<sup>13</sup>C NMR (101 MHz, Chloroform-*d*, with Me<sub>2</sub>SO<sub>2</sub>) **2j**

I-C40-P\_CARBON\_20181102\_01  
I-C40-P  
Benzylidene

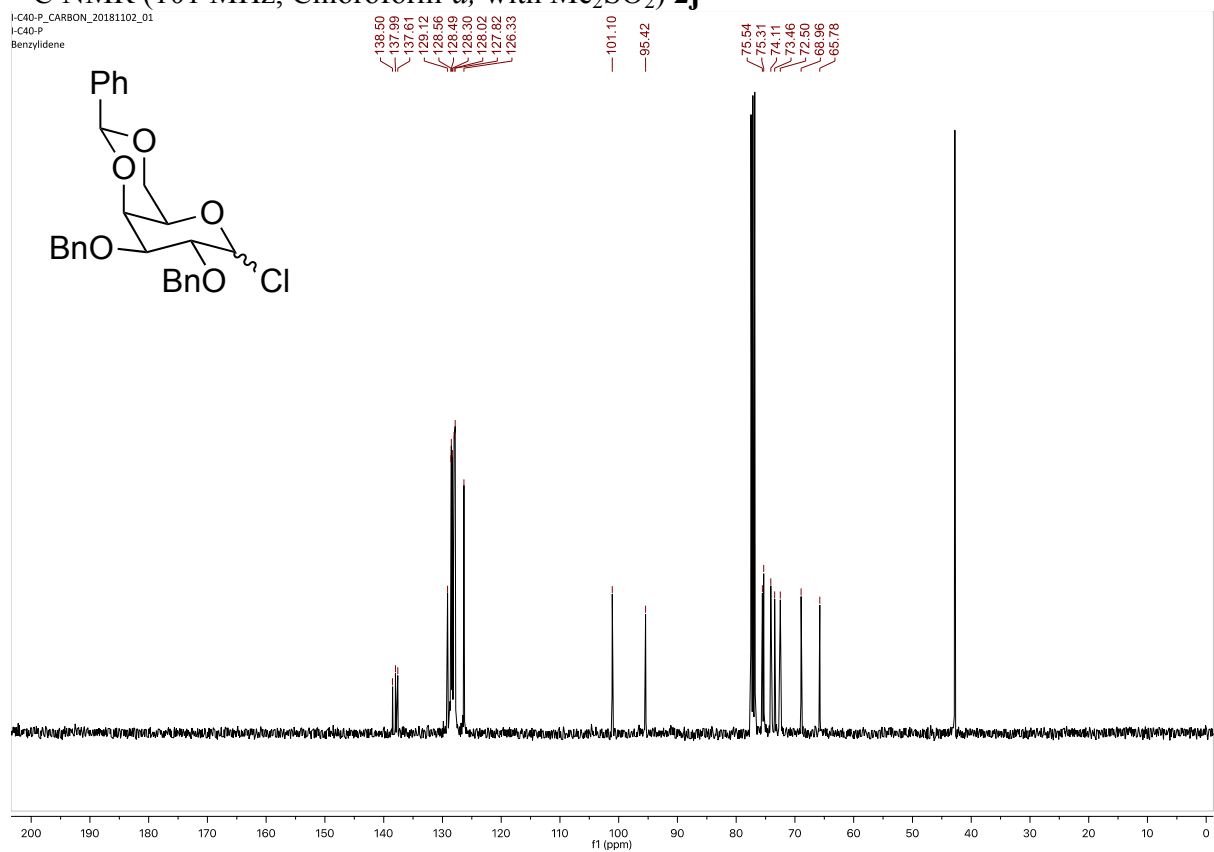

<sup>1</sup>H NMR (500 MHz, Chloroform-*d*, with Me<sub>2</sub>SO<sub>2</sub>) **2k**

I-C39-P\_PROTON\_20181102\_01  
I-C39-P

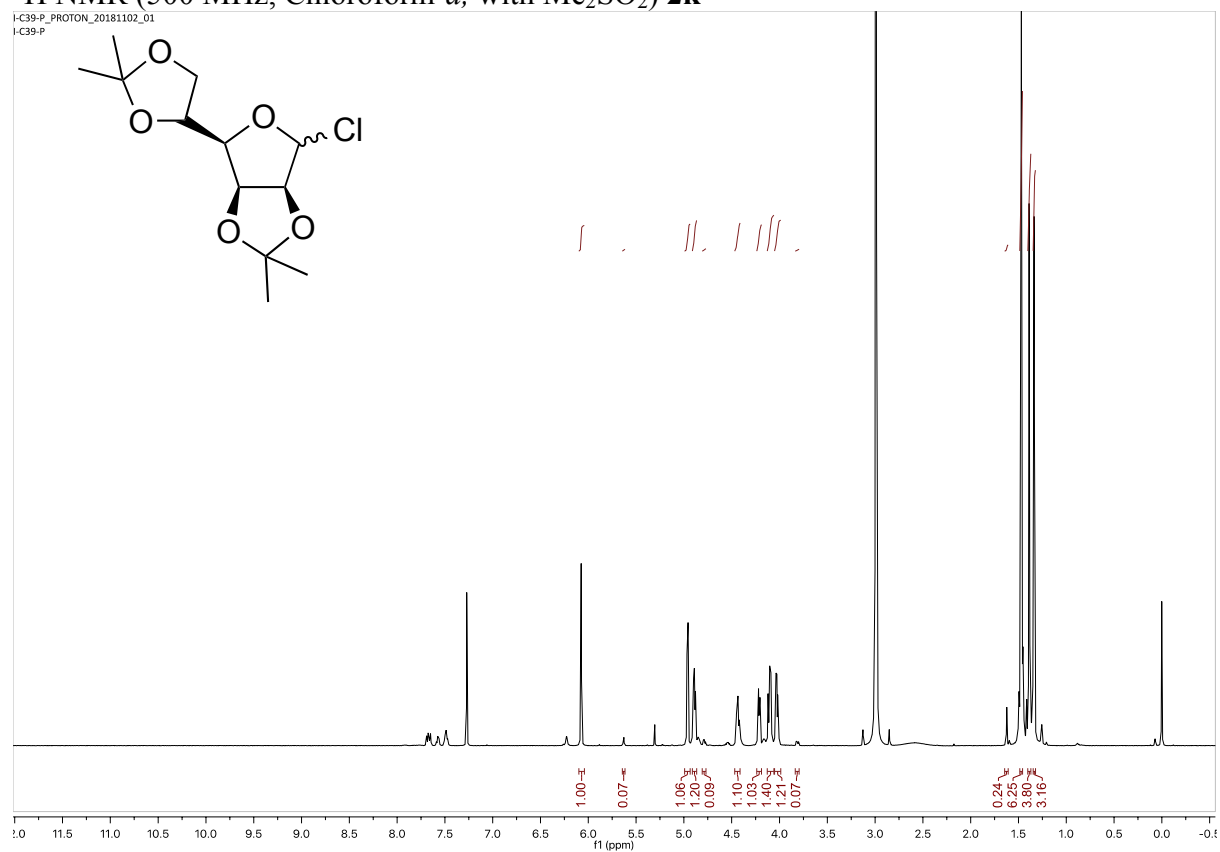

<sup>13</sup>C NMR (126 MHz, Chloroform-*d*, with Me<sub>2</sub>SO<sub>2</sub>) **2k**

I-C39-P CARBON\_20181102\_01  
I-C39-P

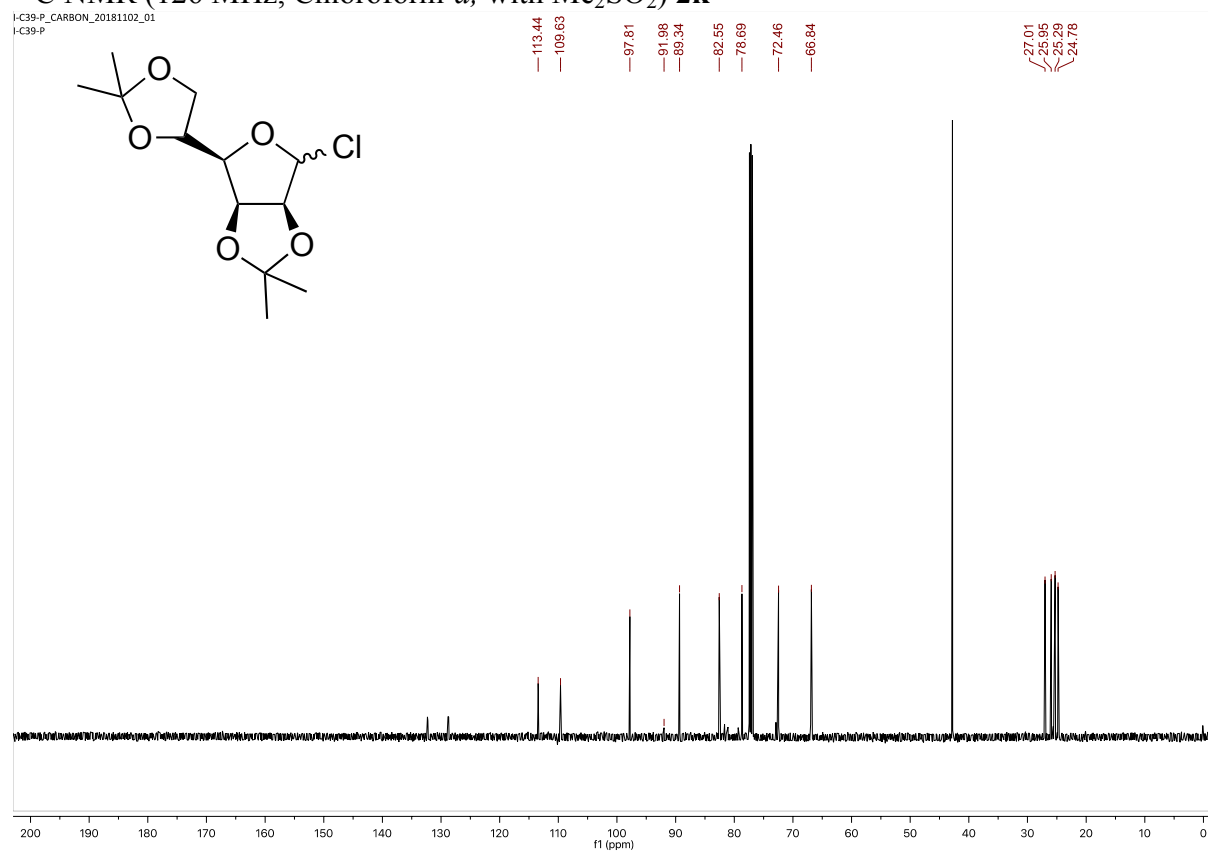

<sup>1</sup>H NMR (500 MHz, Chloroform-*d*, with Me<sub>2</sub>SO<sub>2</sub>) **21**

I-A67-8\_PROTON\_20171123\_01  
I-A67-8  
Ac NPhth

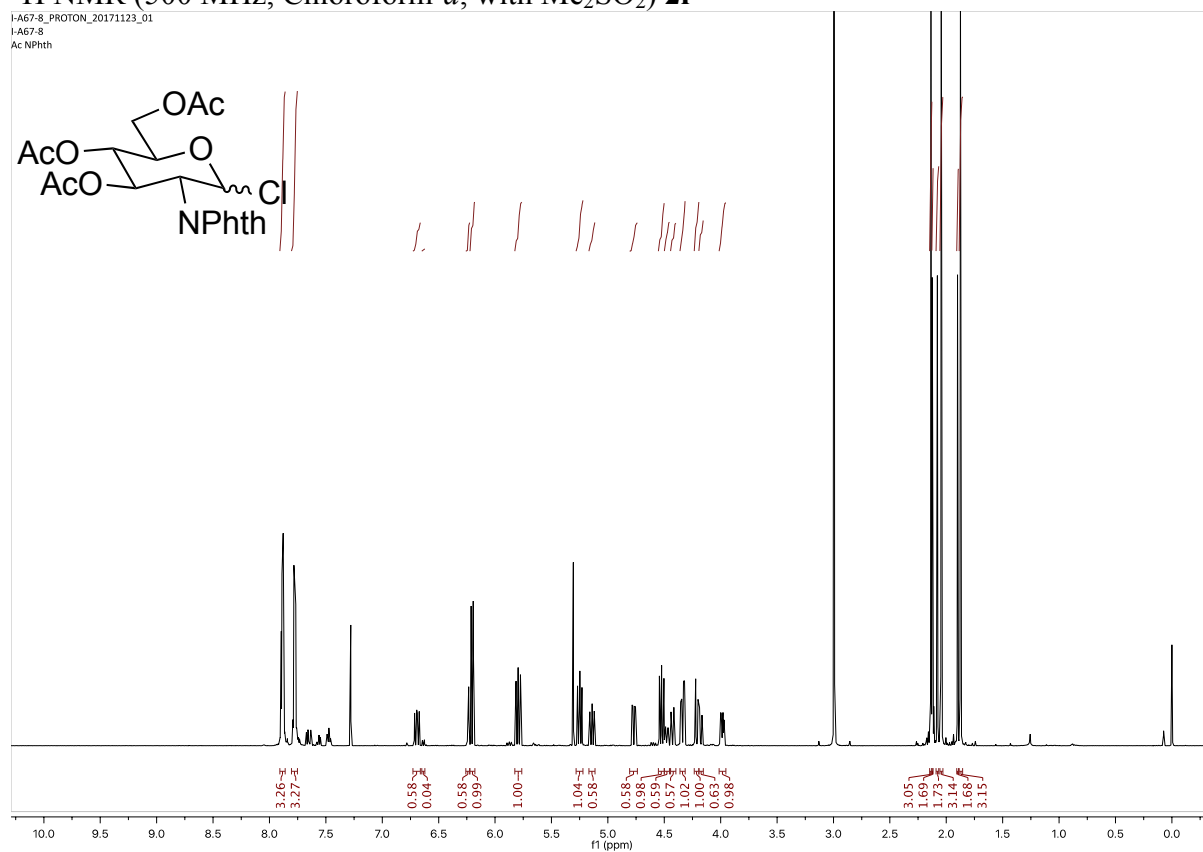

<sup>13</sup>C NMR (101 MHz, Chloroform-*d*, with Me<sub>2</sub>SO<sub>2</sub>) **21**

I-A67-8\_CARBON\_20171124\_01  
I-A67-8  
GlucNAc

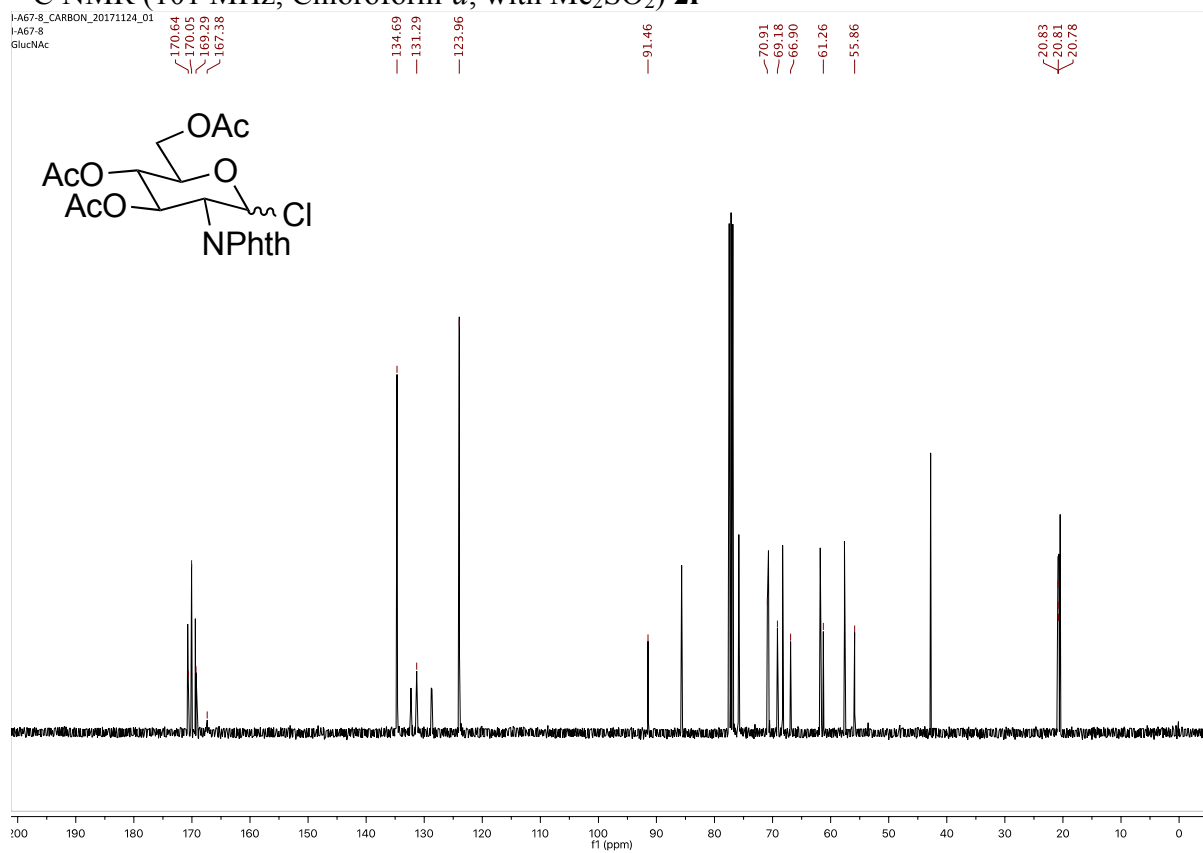

<sup>1</sup>H NMR (500 MHz, Chloroform-*d*, with Me<sub>2</sub>SO<sub>2</sub>) **2o**

I-C45-P\_PROTON\_20181109\_01  
I-C45-P  
AcGluc

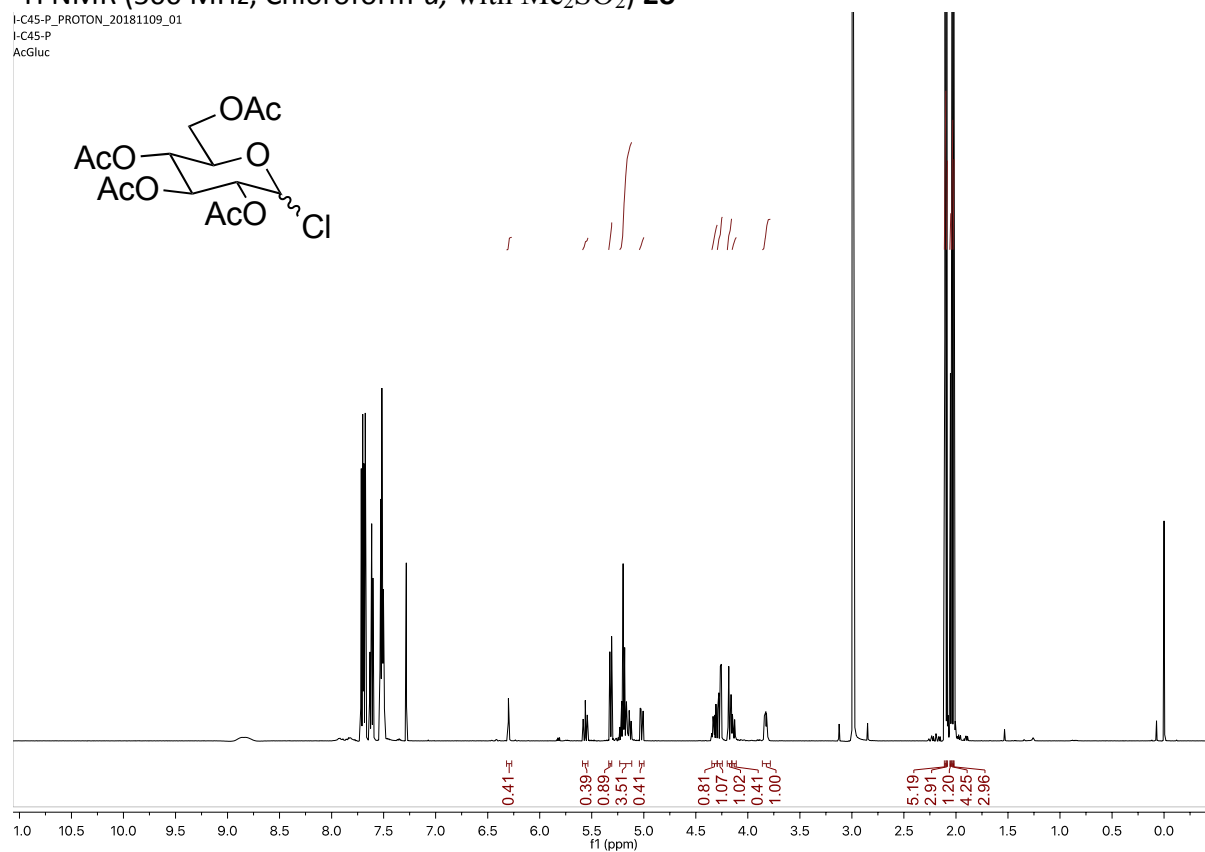

<sup>13</sup>C NMR (101 MHz, Chloroform-*d*, with Me<sub>2</sub>SO<sub>2</sub>) **2o**

I-C45-P\_PROTON\_20181109\_01  
I-C45-P  
AcGluc

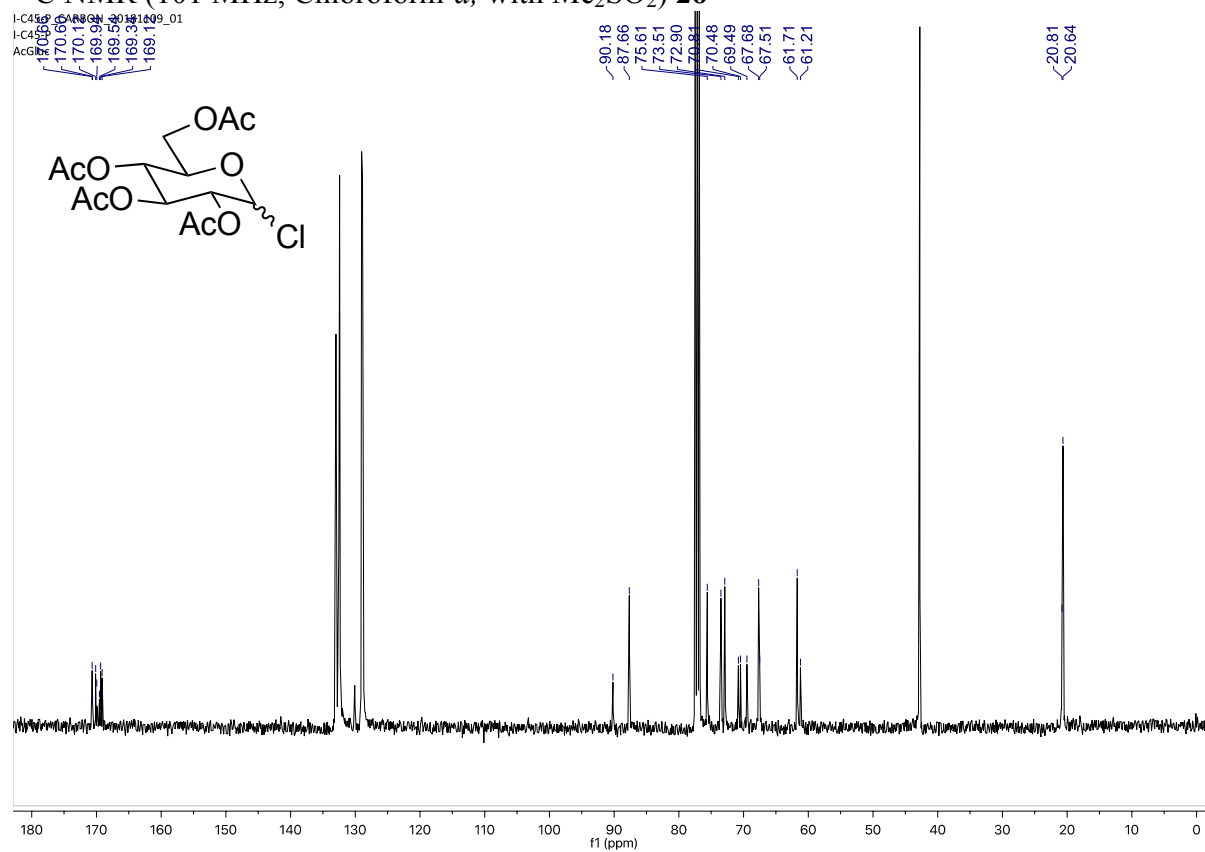

<sup>1</sup>H NMR (500 MHz, Chloroform-*d*, with Me<sub>2</sub>SO<sub>2</sub>) **2p**

I-C46-P\_PROTON\_20181109\_01  
I-C46-P  
AcMan

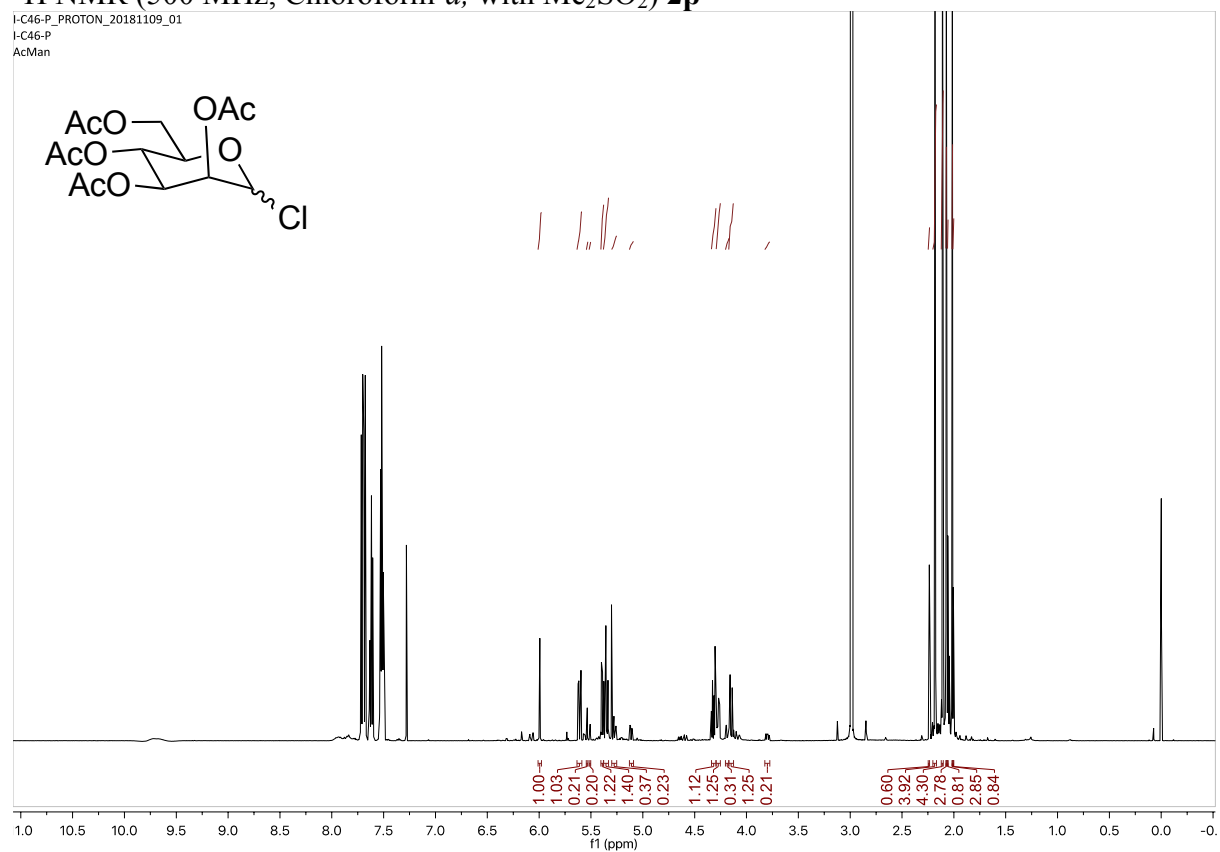

<sup>13</sup>C NMR (101 MHz, Chloroform-*d*, with Me<sub>2</sub>SO<sub>2</sub>) **2p**

I-C46-P\_CARBON\_20181109\_01  
I-C46-P  
AcMan

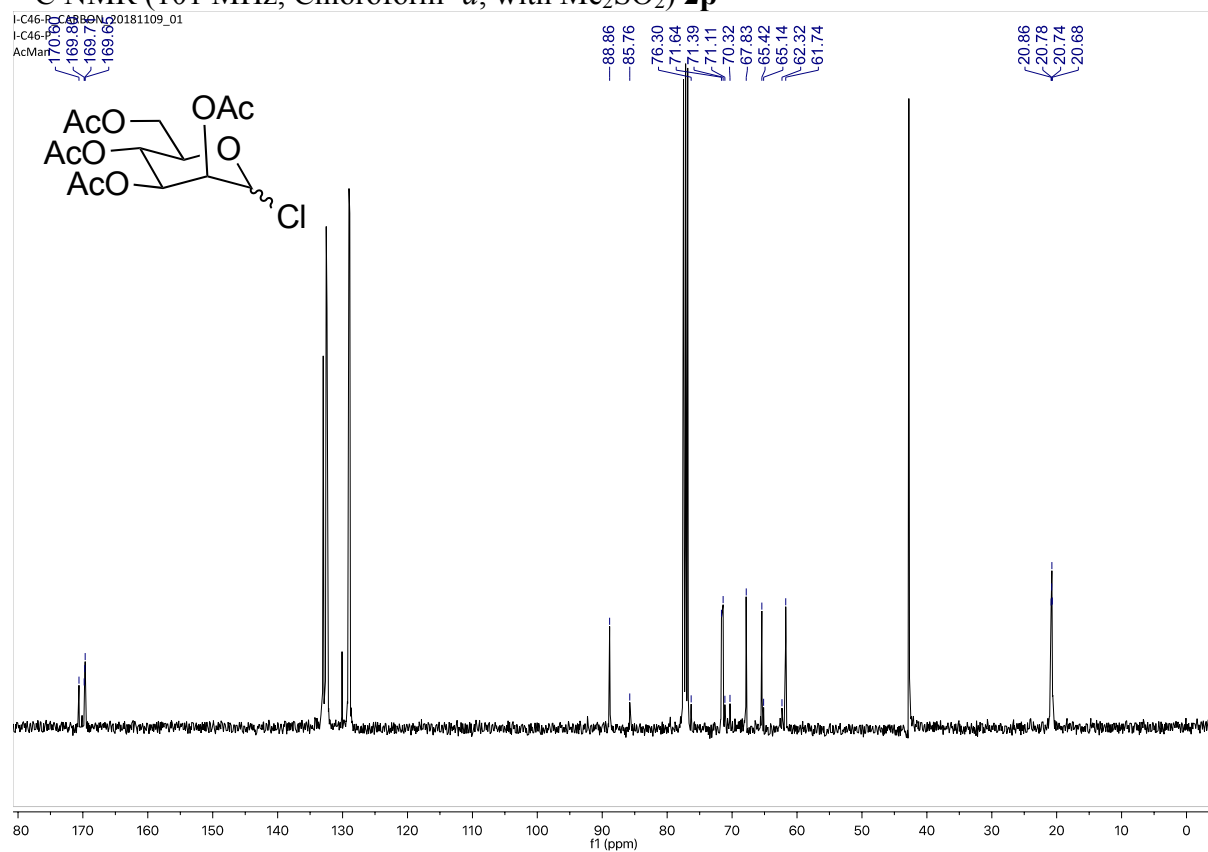

$^{13}\text{C}$  -  $^1\text{H}$  coupled HSQC (400 MHz x 101 MHz, Chloroform-*d*) **2p**

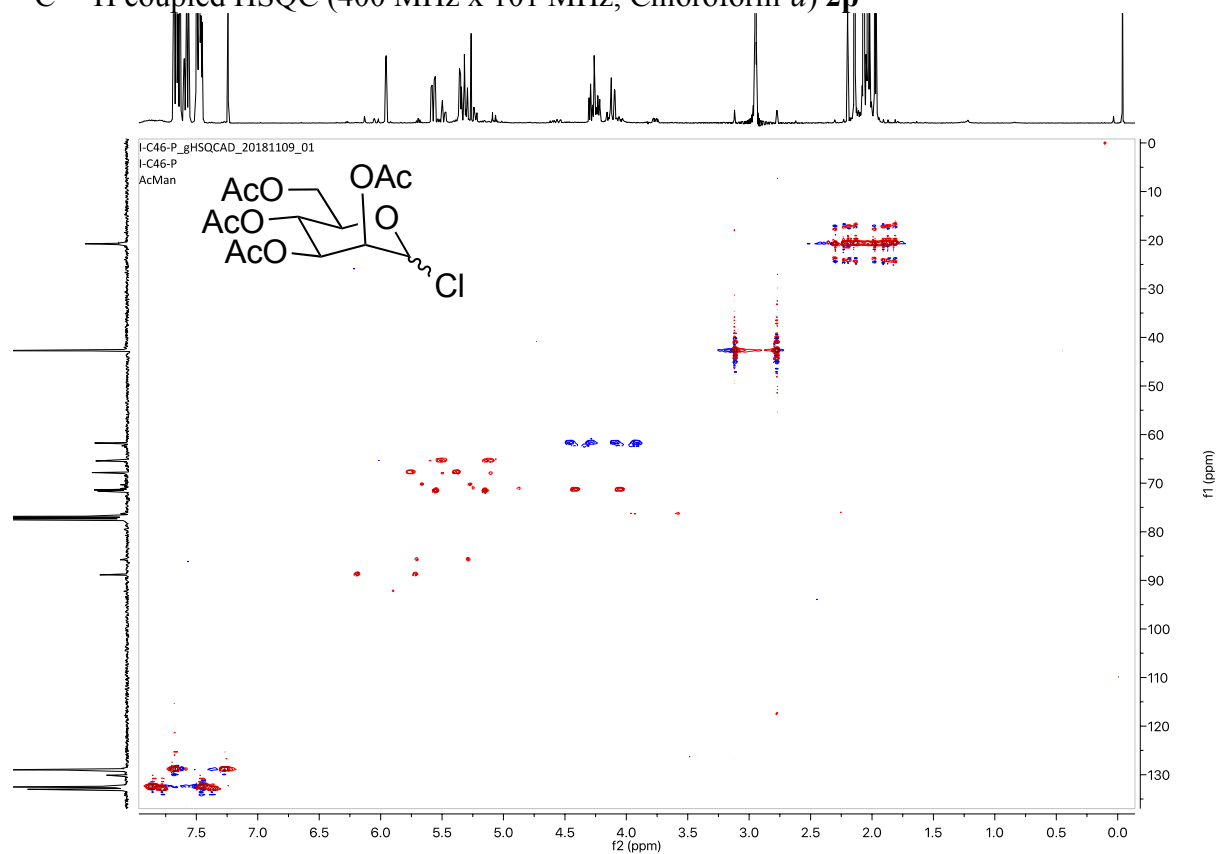

$^1\text{H}$  NMR (500 MHz, Chloroform-*d*, with  $\text{Me}_2\text{SO}_2$ ) **2q**

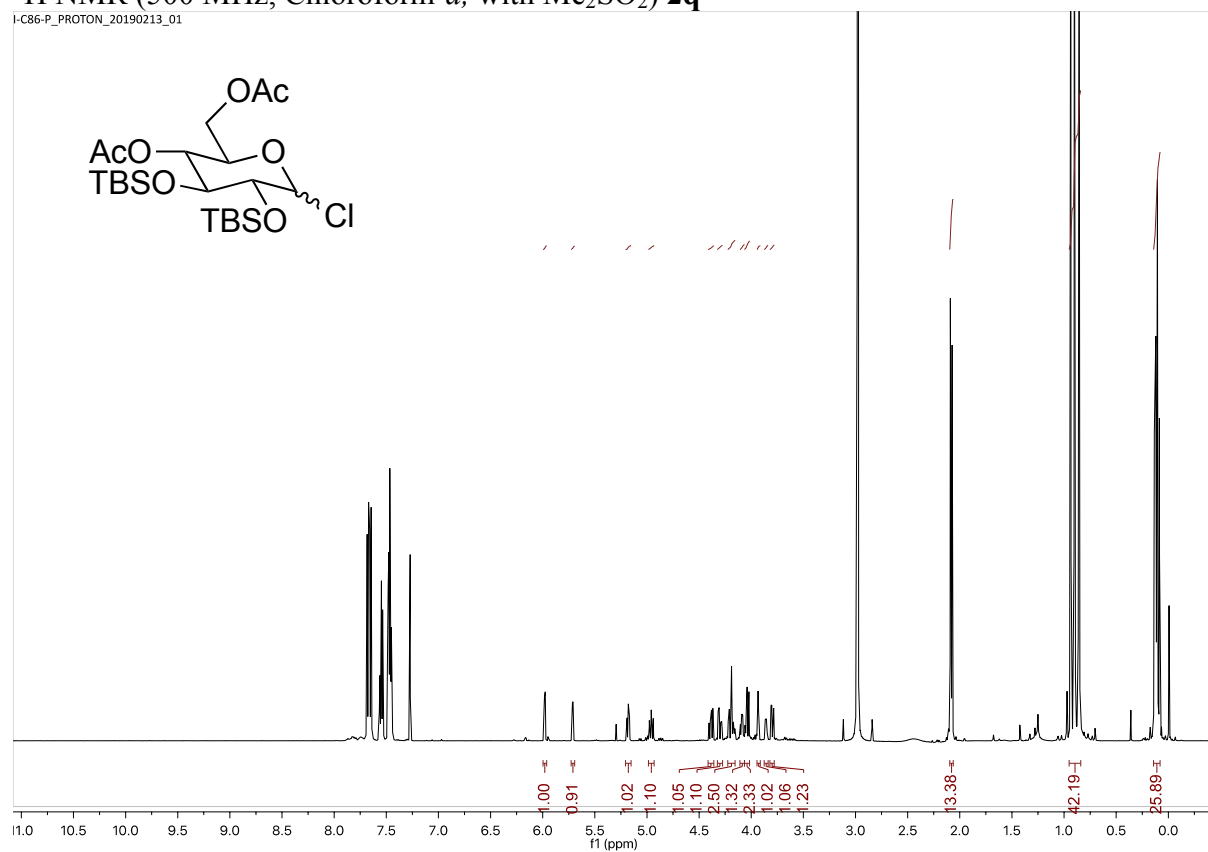

$^{13}\text{C}$  NMR (126 MHz, Chloroform-*d*, with  $\text{Me}_2\text{SO}_2$ ) **2q**

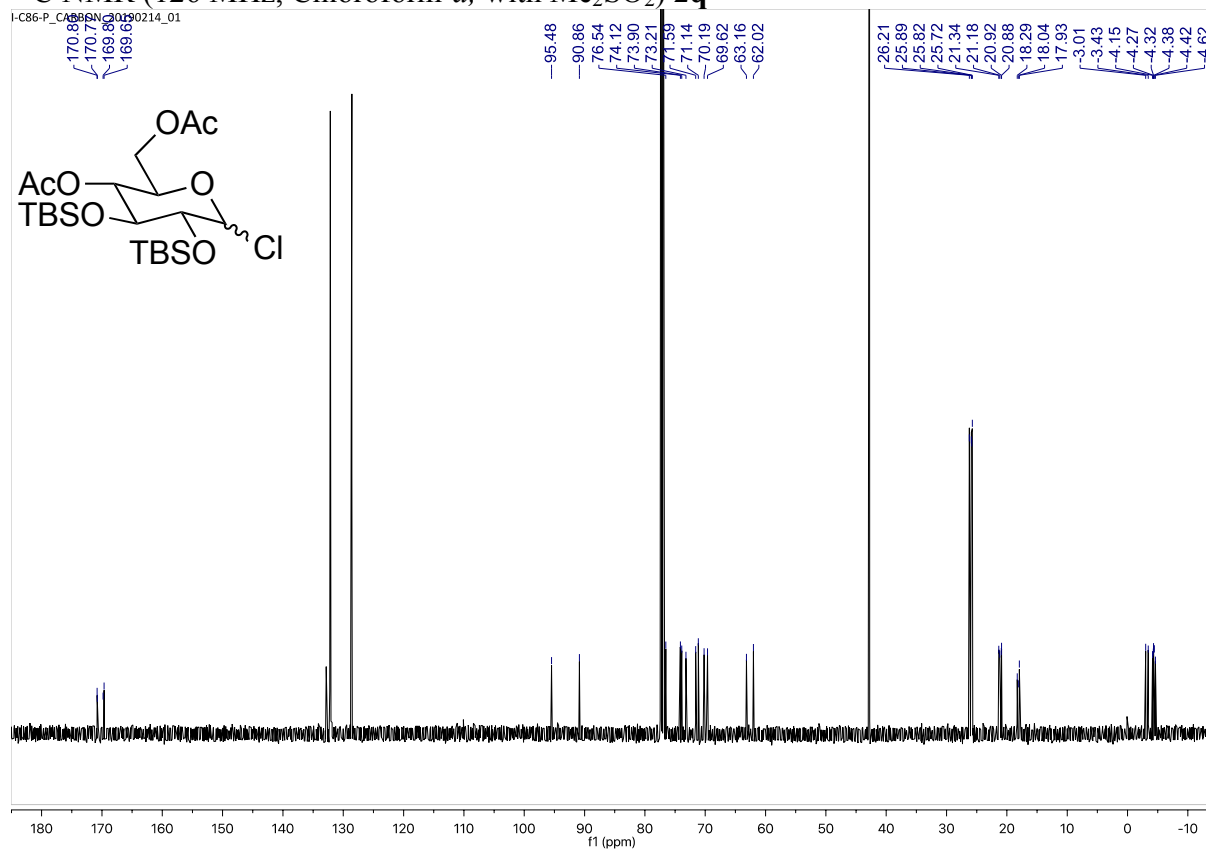

COSY (500 MHz, Chloroform-*d*) **2q**

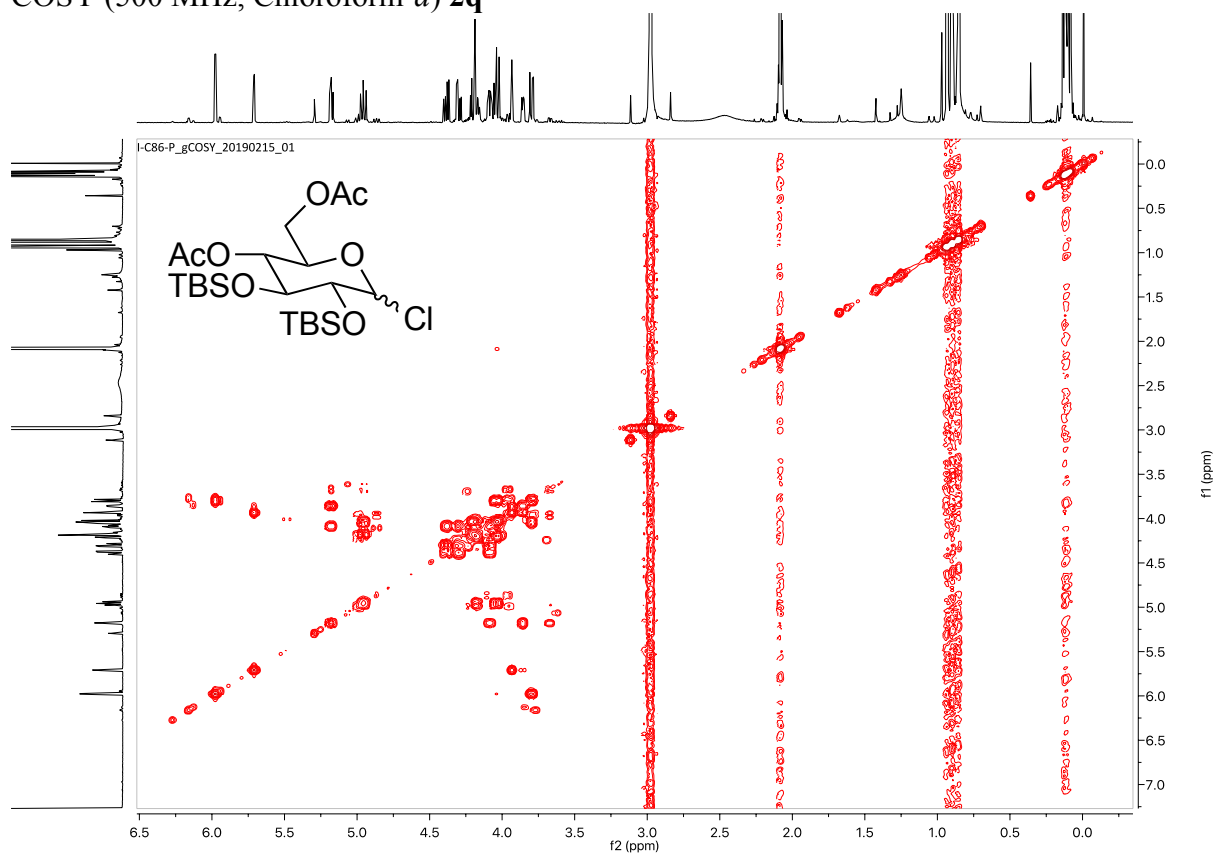

$^{13}\text{C}$  -  $^1\text{H}$  decoupled HSQC (500 MHz x 126 MHz, Chloroform-*d*) **2q**

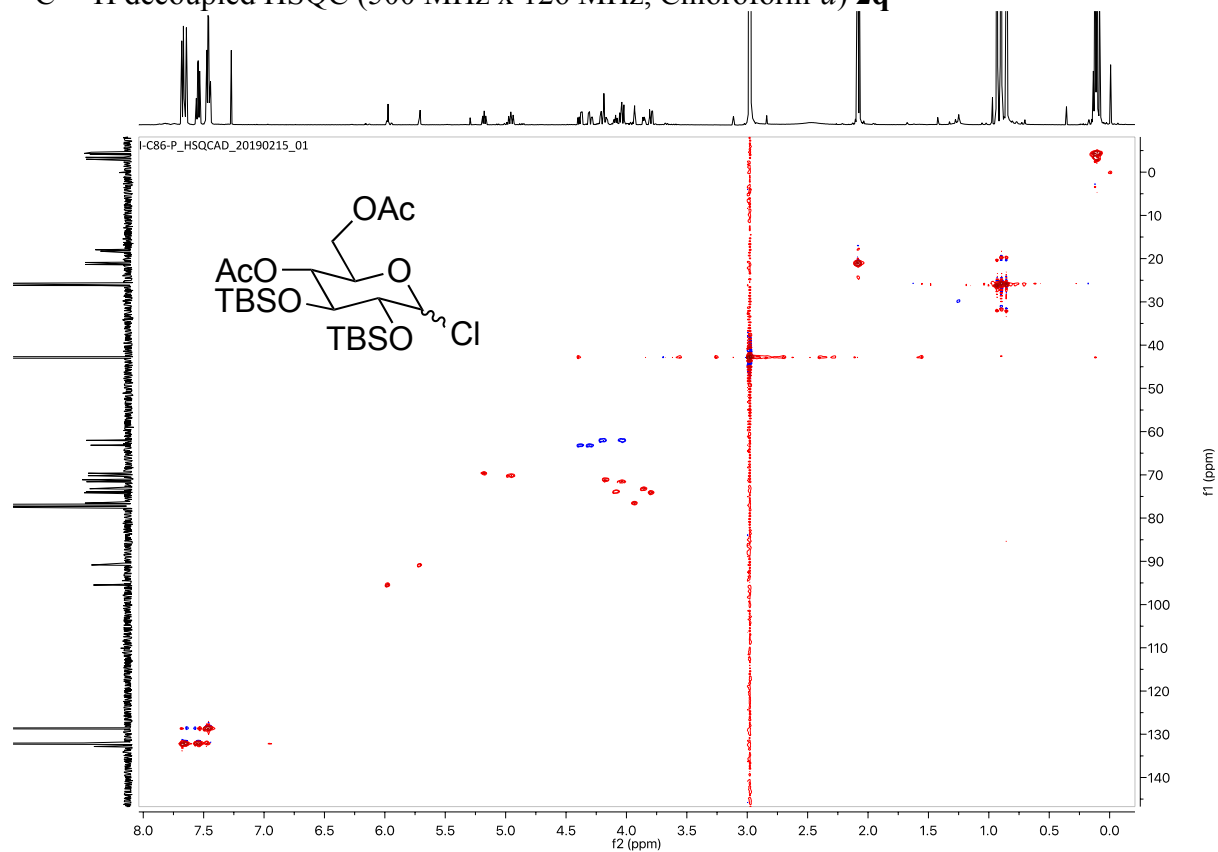

$^{13}\text{C}$  -  $^1\text{H}$  coupled HSQC (400 MHz x 101 MHz, Chloroform-*d*) **2q**

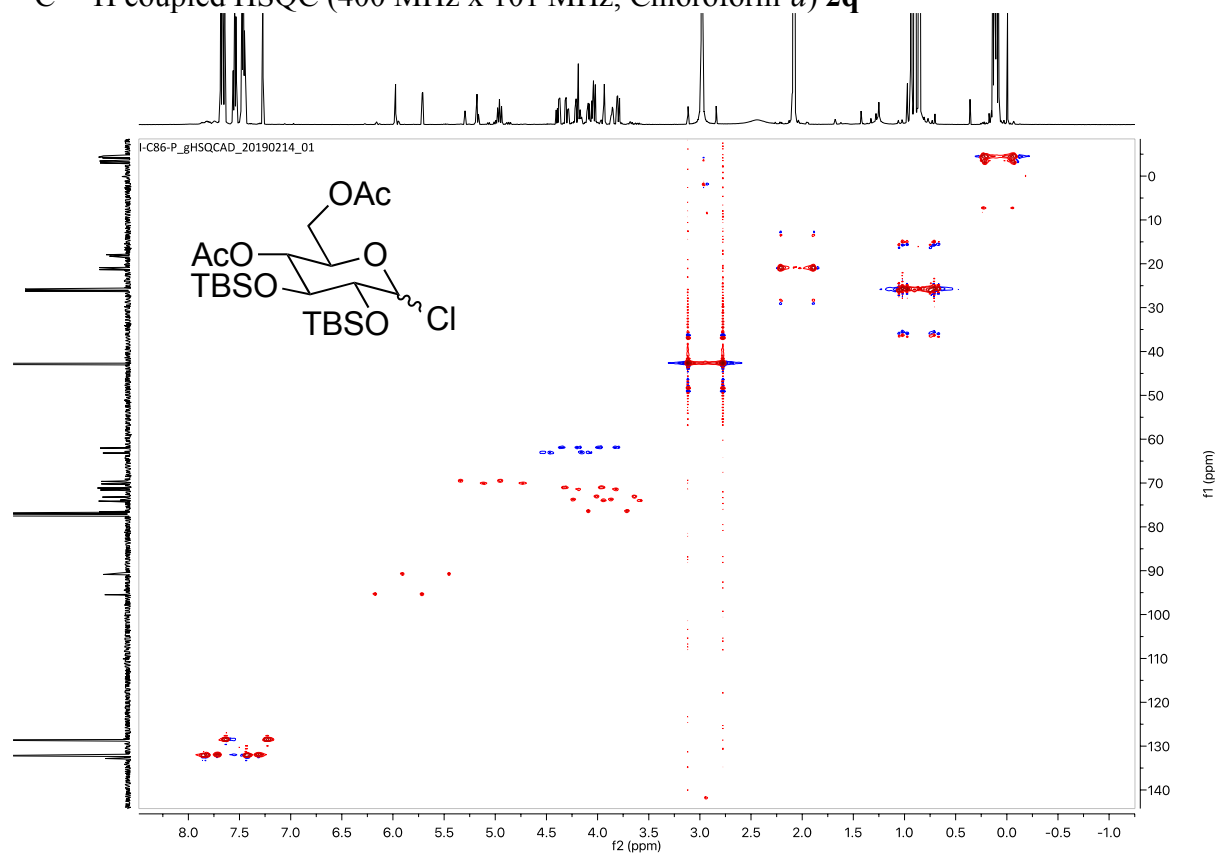

HMBC (500 MHz x 126 MHz, Chloroform-*d*) **2q**

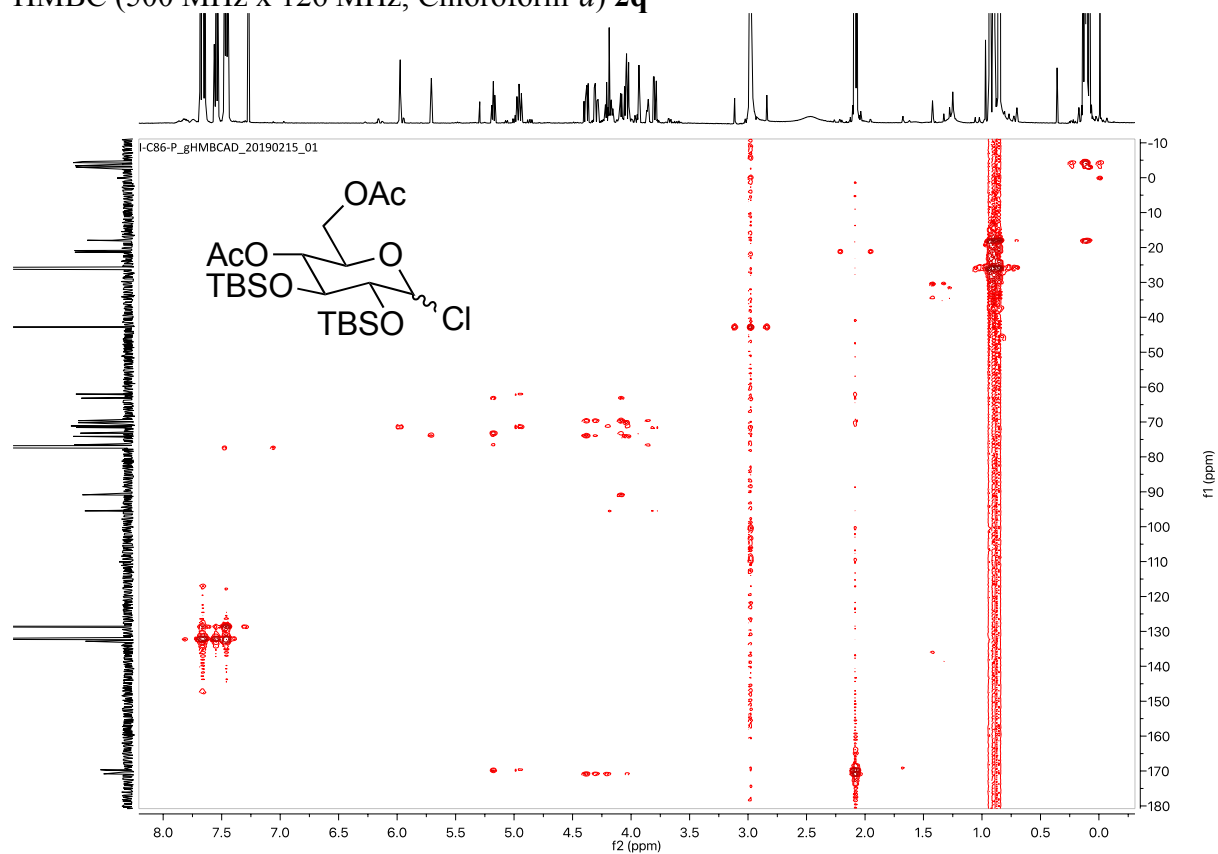

NOESY (500 MHz, Chloroform-*d*) **2q**

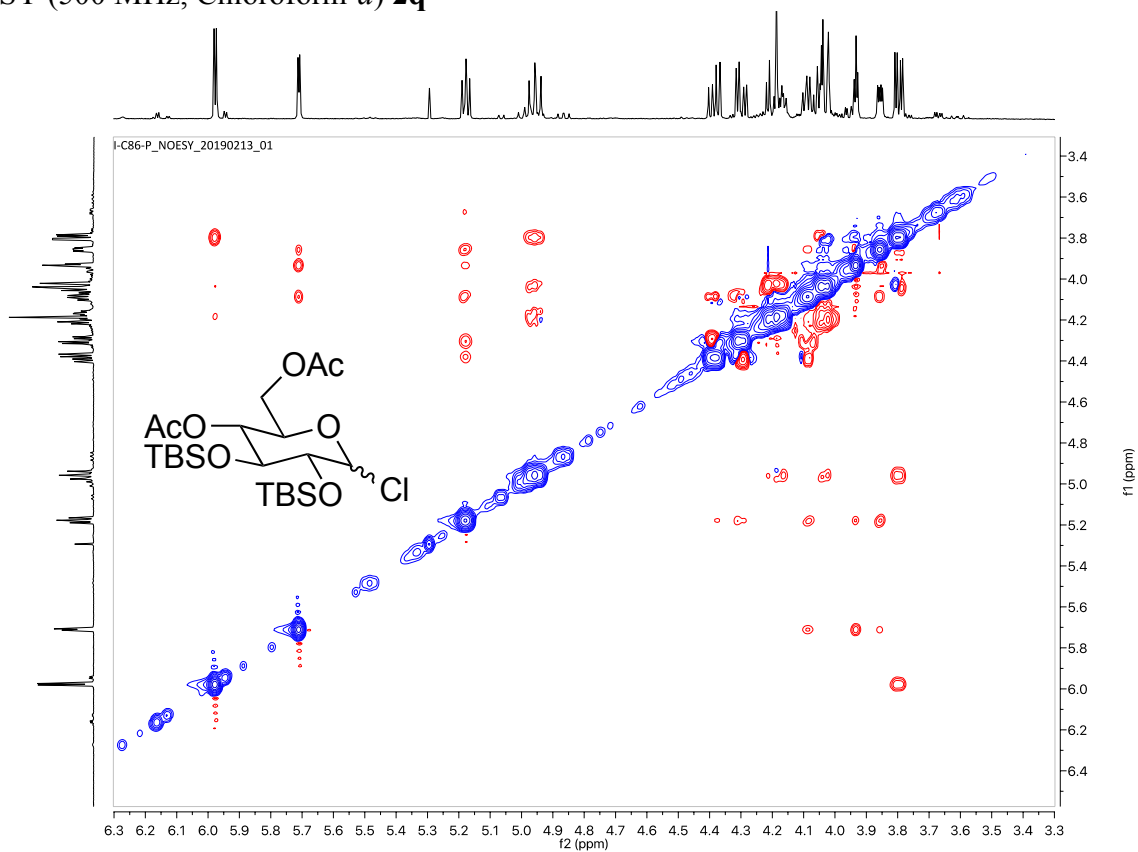

<sup>1</sup>H NMR (500 MHz, Chloroform-*d*, with Me<sub>2</sub>SO<sub>2</sub>) **2r**

I-C87-B-P\_PROTON\_20190213\_01

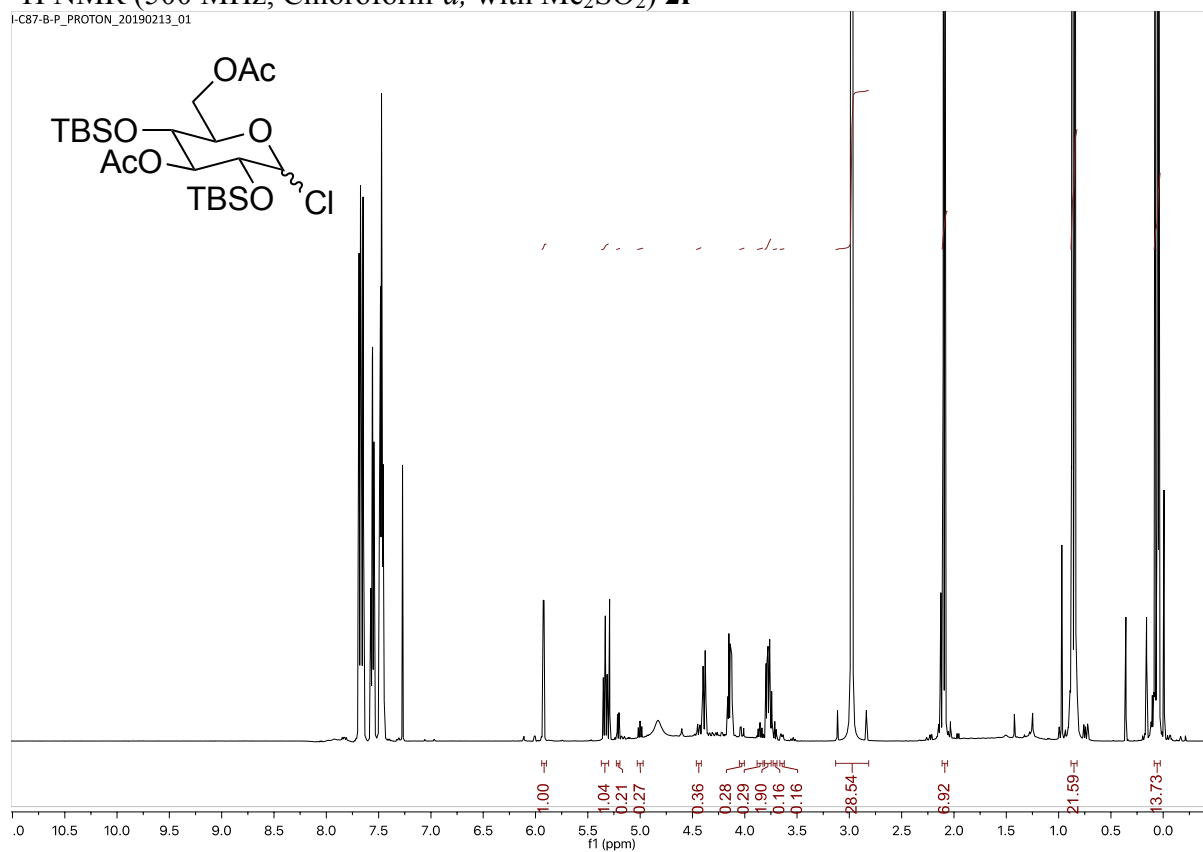

<sup>13</sup>C NMR (126 MHz, Chloroform-*d*, with Me<sub>2</sub>SO<sub>2</sub>) **2r**

I-C87-B-P\_PROTON\_20190213\_01

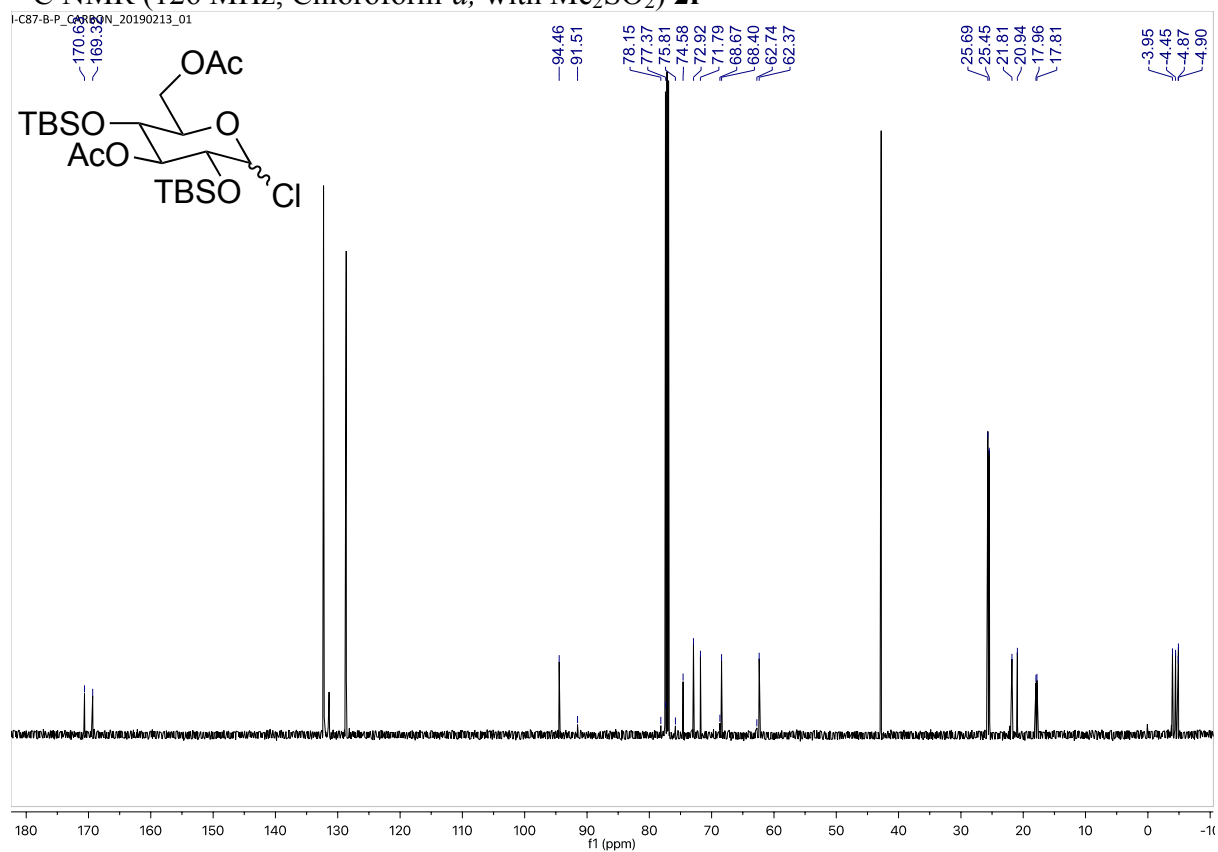

COSY (500 MHz, Chloroform-*d*) **2r**

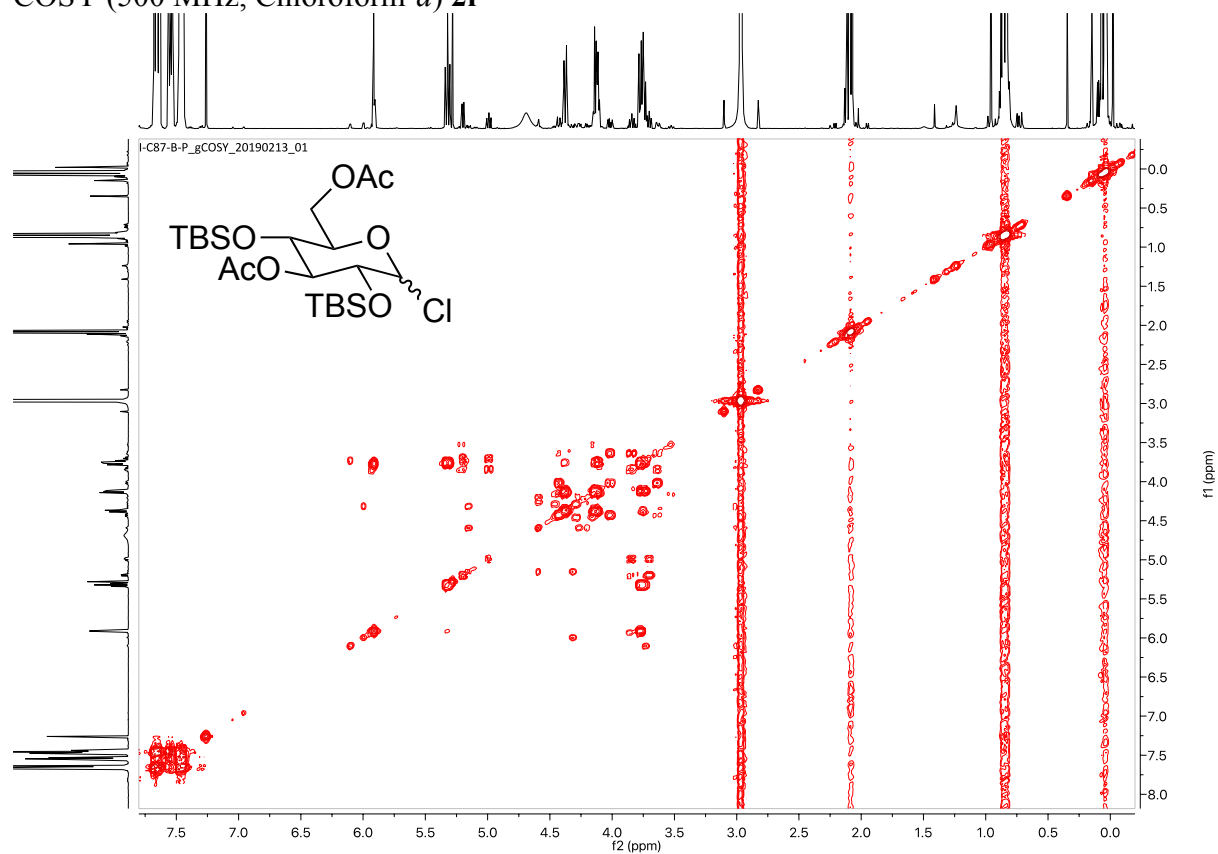

<sup>13</sup>C - <sup>1</sup>H decoupled HSQC (500 MHz x 126 MHz, Chloroform-*d*) **2r**

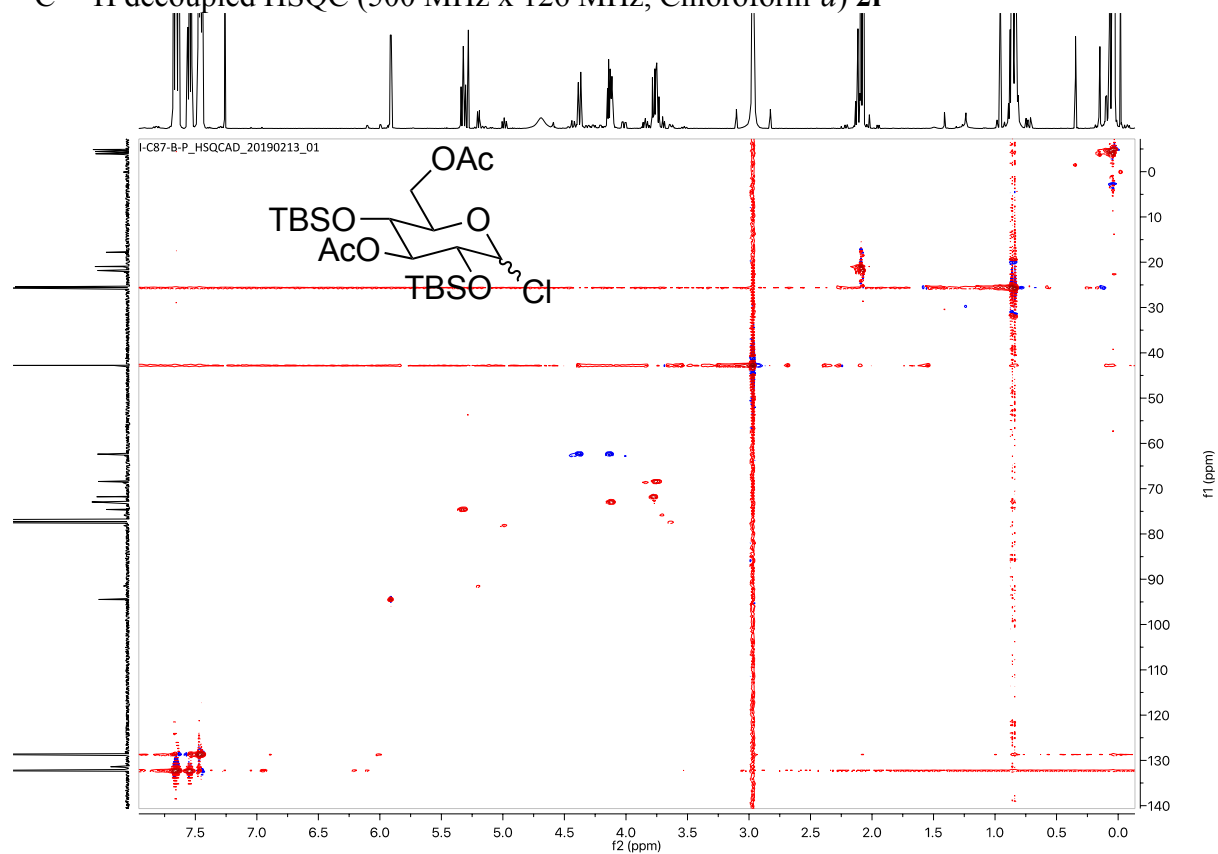

$^{13}\text{C}$  -  $^1\text{H}$  coupled HSQC (400 MHz x 101 MHz, Chloroform-*d*) **2r**

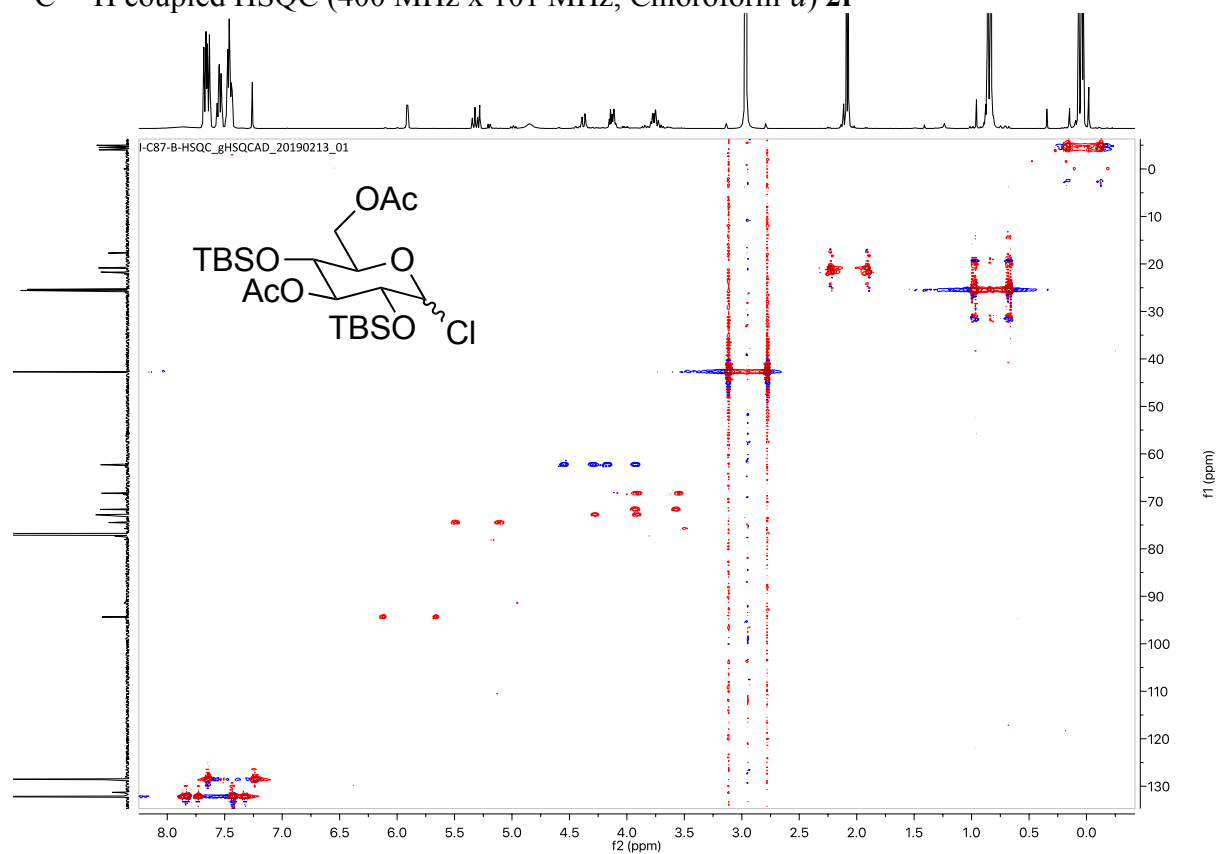

HMBC (500 MHz x 126 MHz, Chloroform-*d*) **2r**

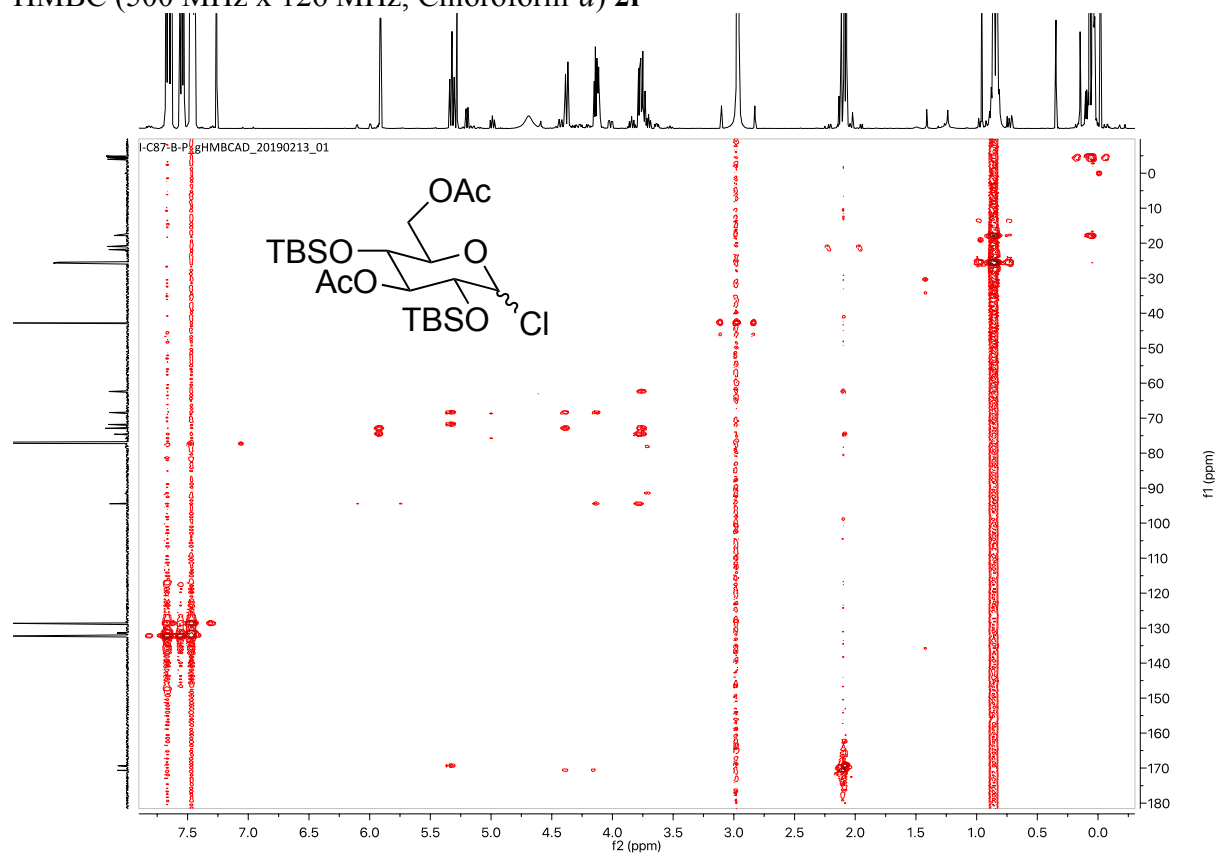

<sup>1</sup>H NMR (500 MHz, Chloroform-*d*, with Me<sub>2</sub>SO<sub>2</sub>) **2s**

I-C36-P\_PROTON\_20181101\_01  
I-C36-P  
TBSGal

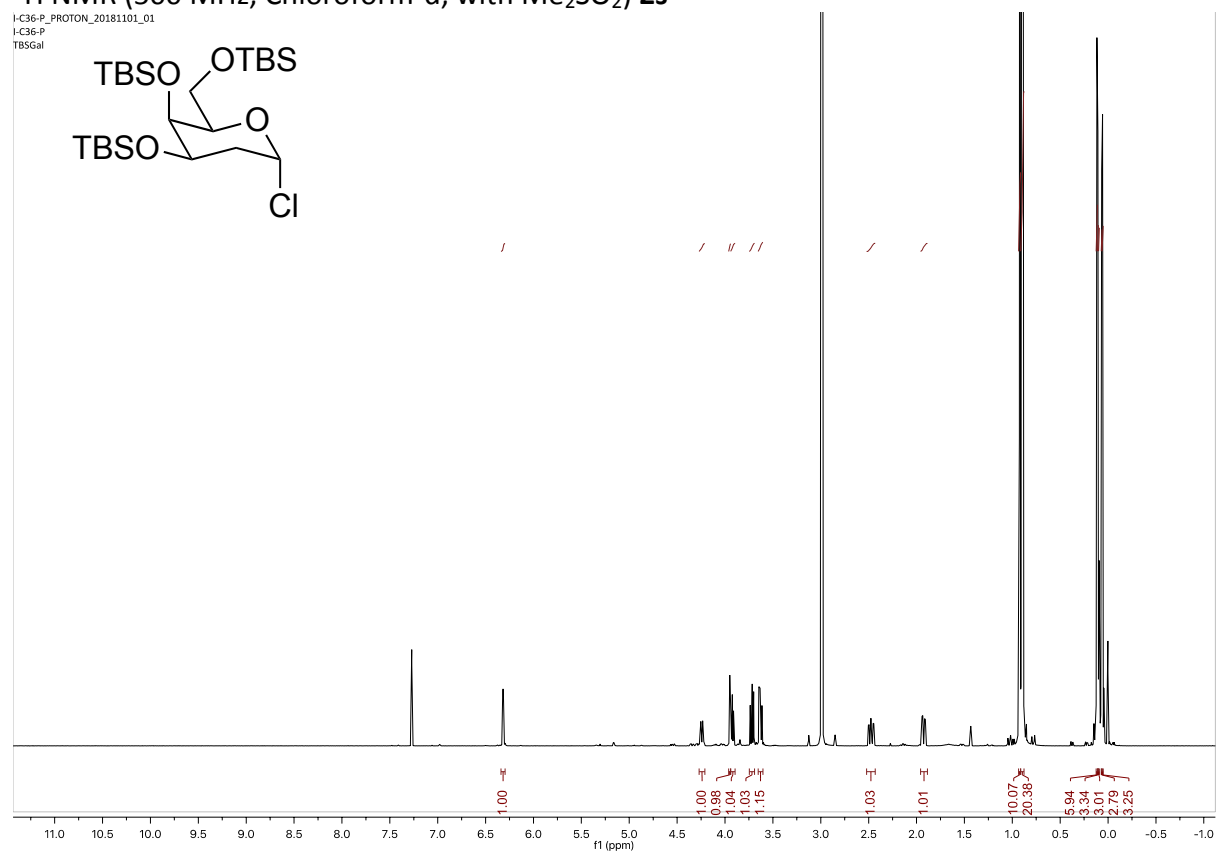

<sup>13</sup>C NMR (126 MHz, Chloroform-*d*, with Me<sub>2</sub>SO<sub>2</sub>) **2s**

I-C36-P CARBON\_20181101\_01  
I-C36-P  
TBSGal

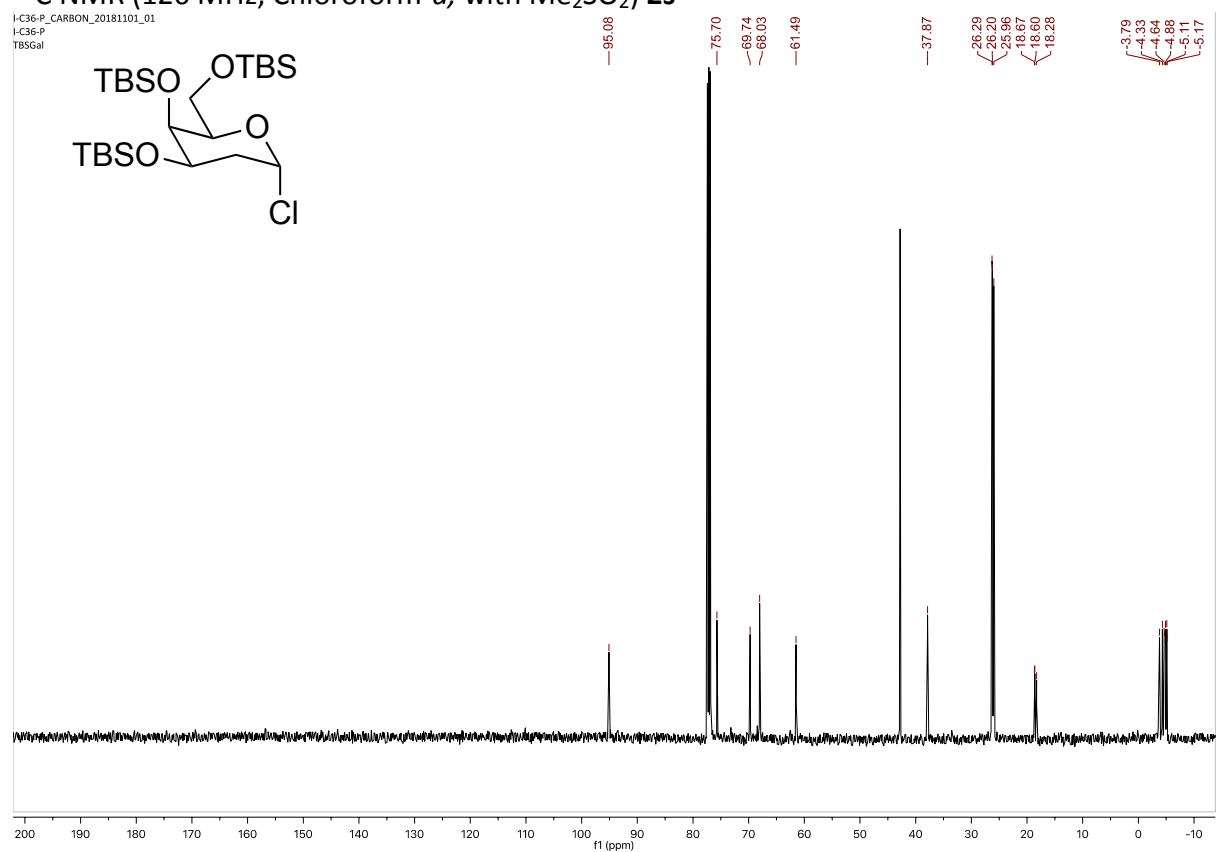

COSY (500 MHz, Chloroform-*d*) **2s**

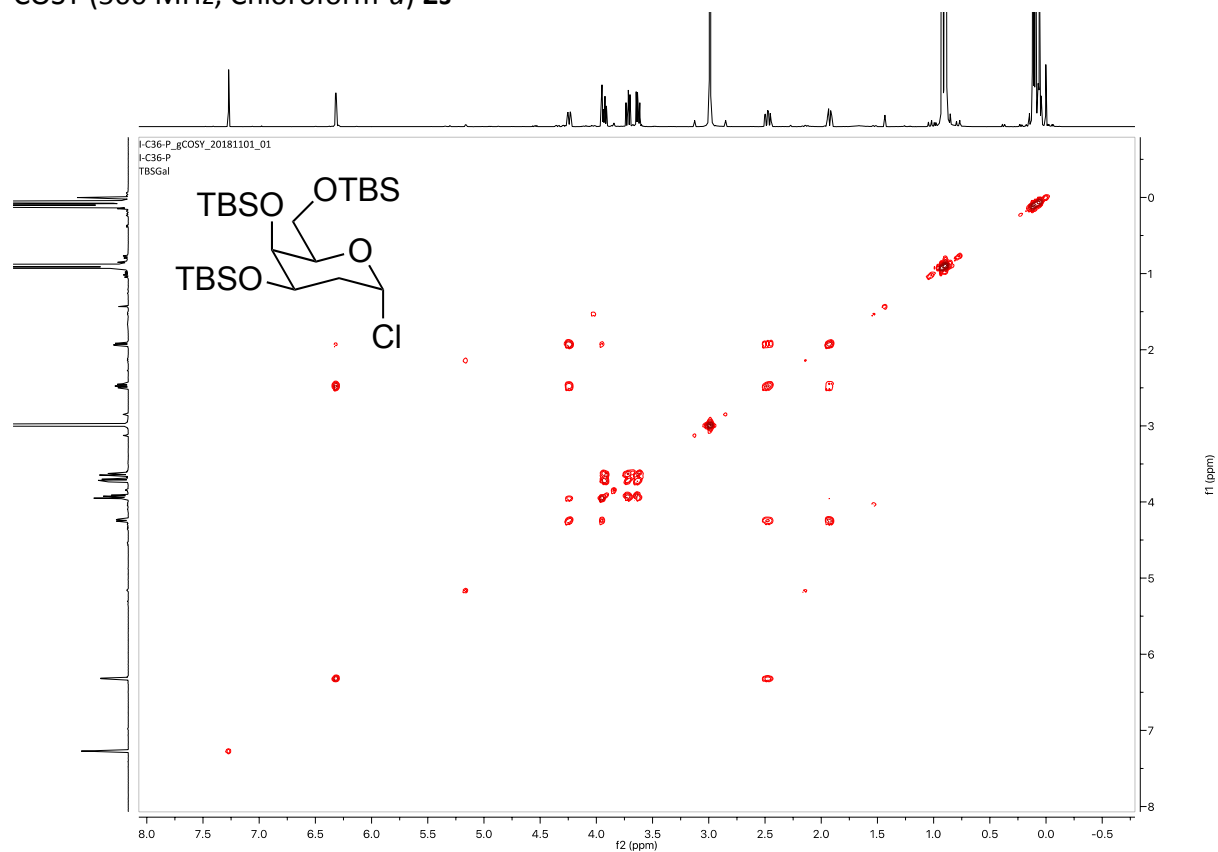

<sup>13</sup>C - <sup>1</sup>H decoupled HSQC (500 MHz x 126 MHz, Chloroform-*d*) **2s**

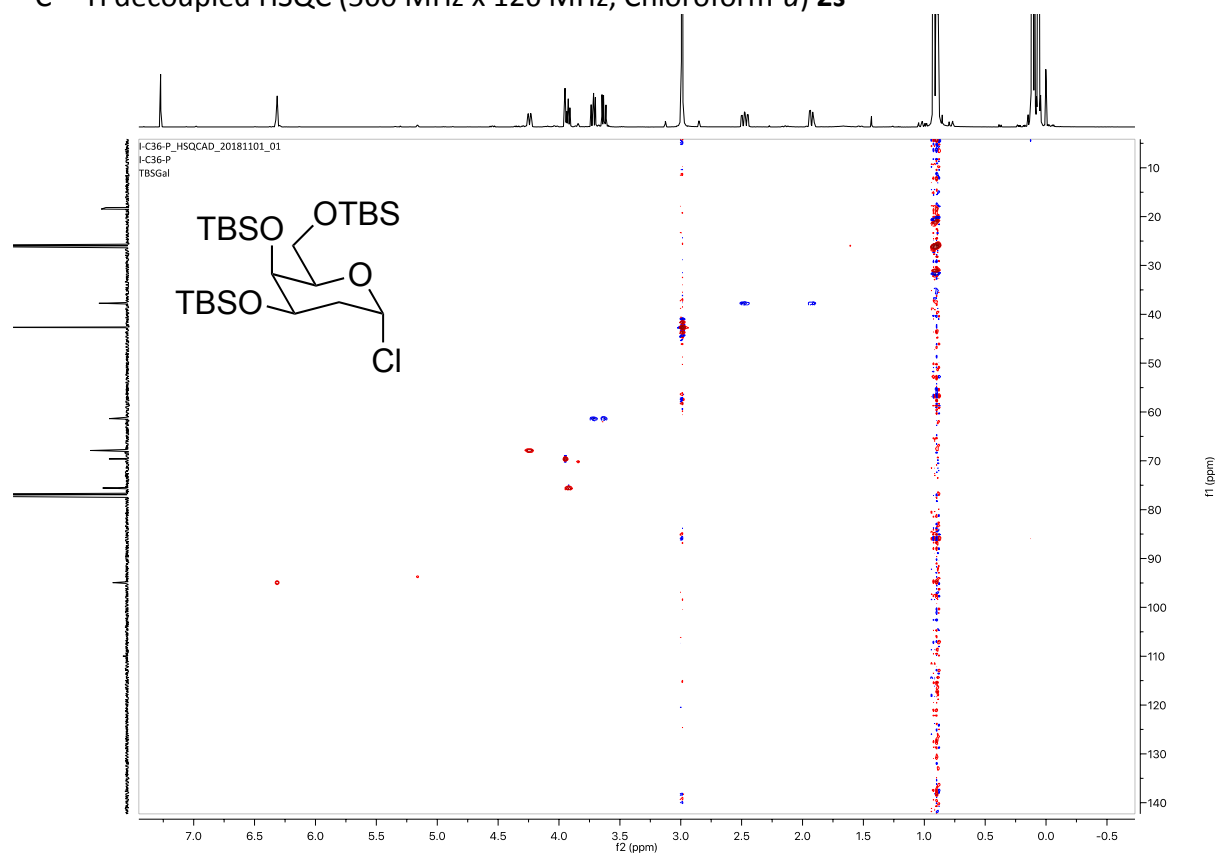

1-C36-P\_gHSQCAD\_20181102\_01  
1-C36-P  
TBSGal

Chemical structure of compound 1: A cyclohexane ring with a TBSO group at C1, an OTBS group at C2, a TBSO group at C3, and a chlorine atom at C4.

1

1-B12\_PROTON\_20180420\_01  
1-B12

Chemical structure of compound **9** is shown, which is a disaccharide derivative with multiple benzyl (Bn) protecting groups and a methoxy (OMe) group.

The <sup>1</sup>H NMR spectrum (CDCl<sub>3</sub>) displays the following chemical shifts (ppm) and integration values:

- 7.39, 7.37, 7.25 (Aromatic/Benzylic protons)
- 4.78, 3.61, 3.23, 1.24, 1.28, 1.26, 3.57, 1.39, 3.81, 2.48, 1.31, 3.00, 0.45 (Sugar and methoxy protons)

I-B12\_CARBON\_20180421\_01  
I-B12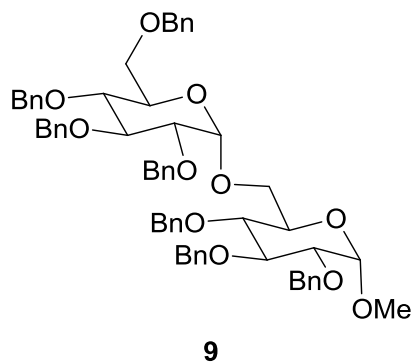

I-A100\_PROTON\_20180328\_01  
I-A100

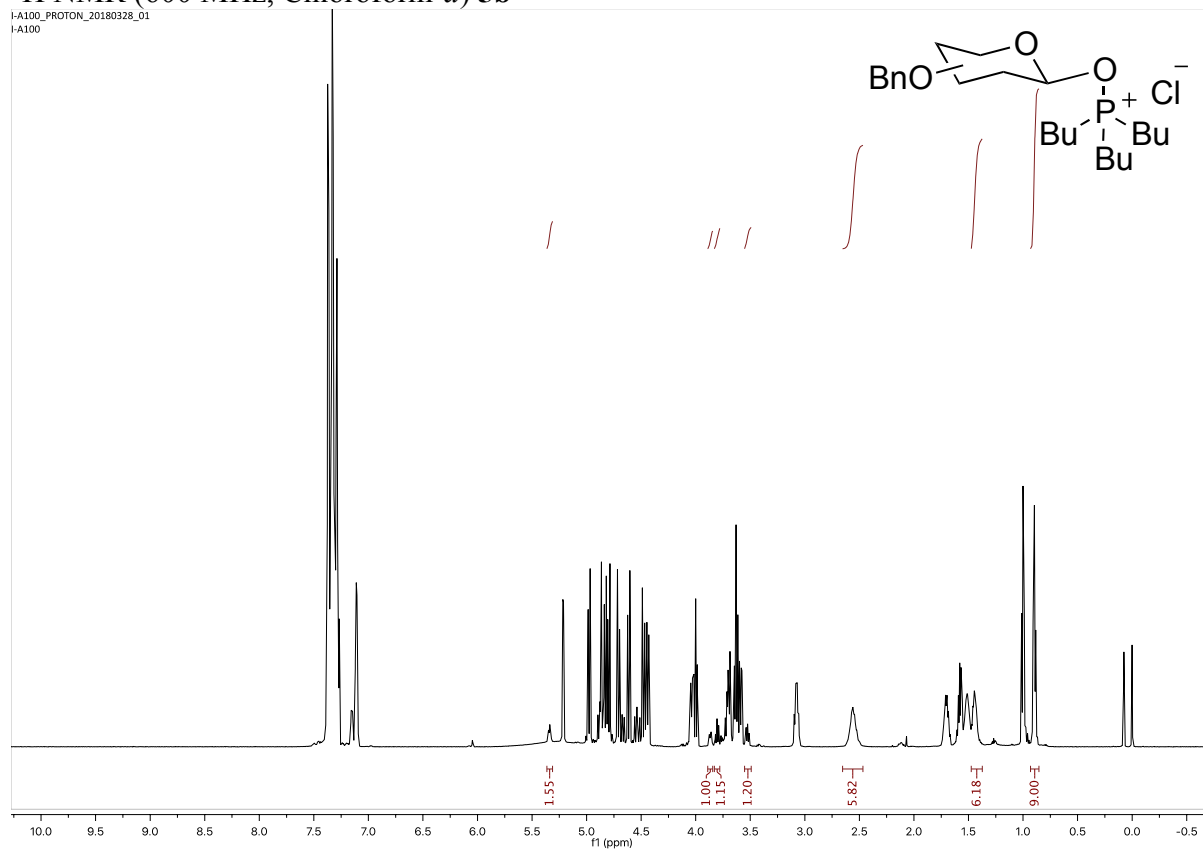

<sup>31</sup>P NMR (243 MHz, Chloroform-*d*) **5b**

f-A100\_PHOSPHORUS\_20180328\_02  
f-A100

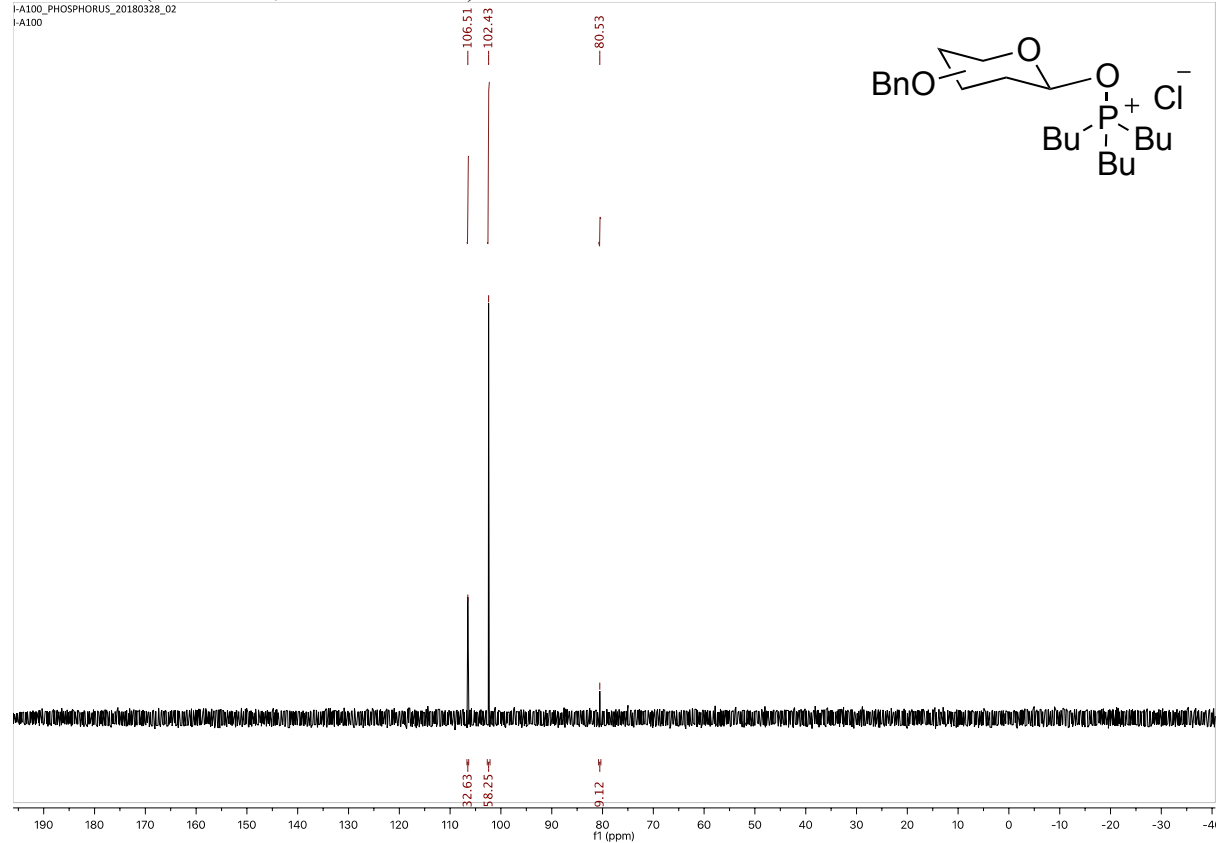

<sup>31</sup>P- <sup>1</sup>H HMBC (600 MHz x 243 MHz, Chloroform-*d*) **5b**

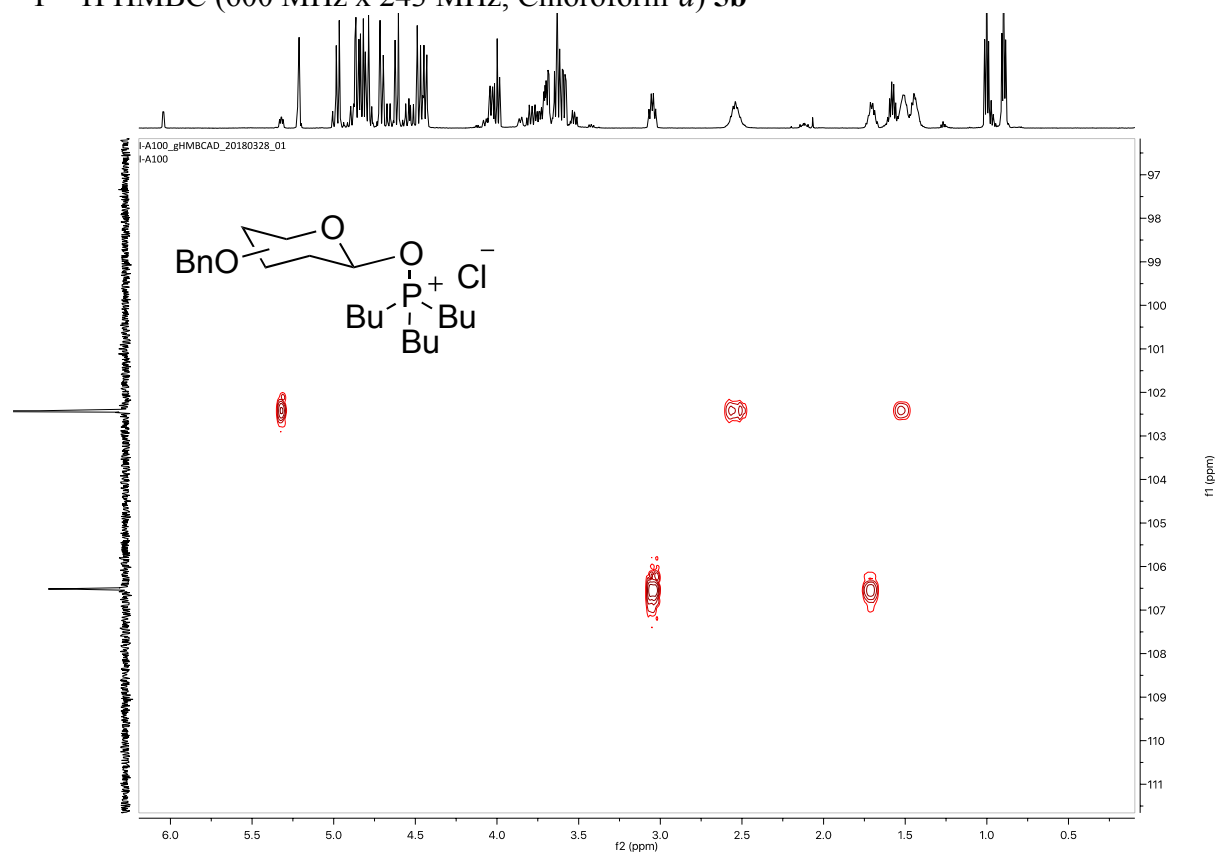

$^{13}\text{C}$  -  $^1\text{H}$  decoupled HSQC (600 MHz x 151 MHz, Chloroform-*d*) **5b**

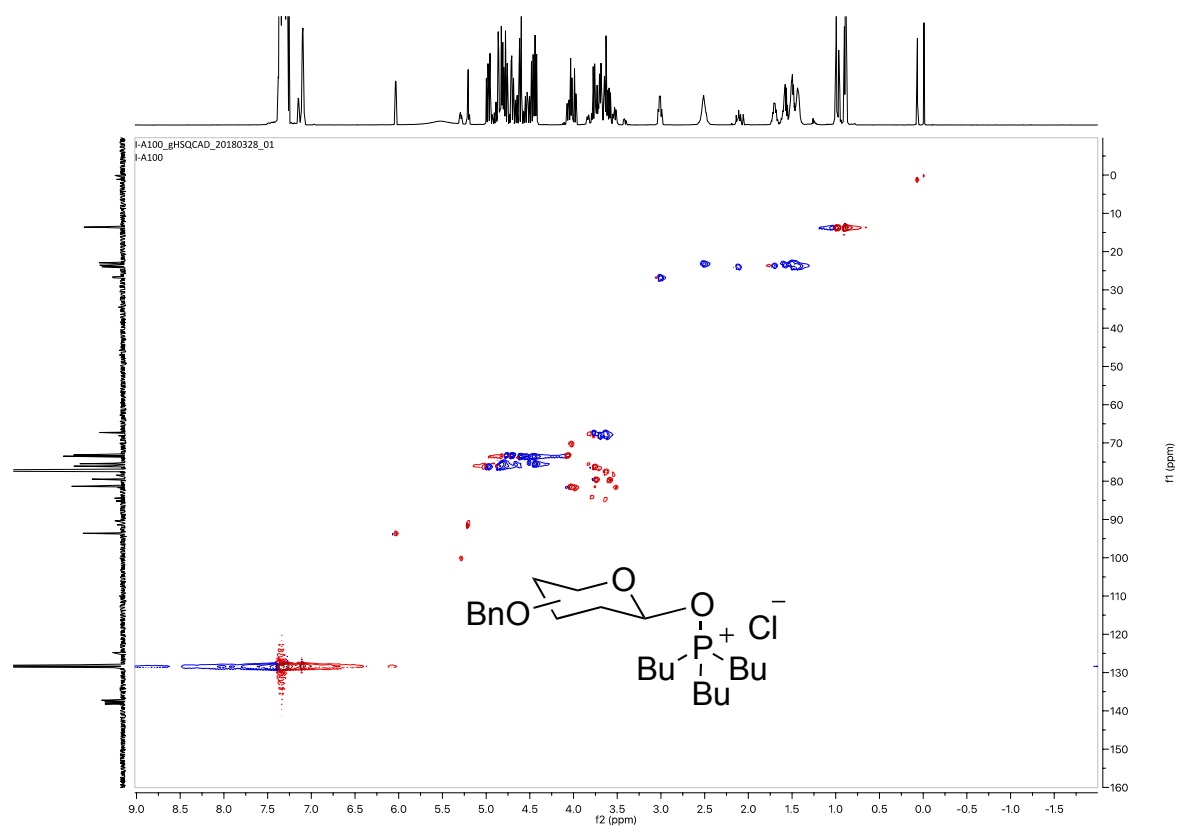

$^{13}\text{C}$  -  $^1\text{H}$  coupled HSQC (600 MHz x 151 MHz, Chloroform-*d*) **5b**

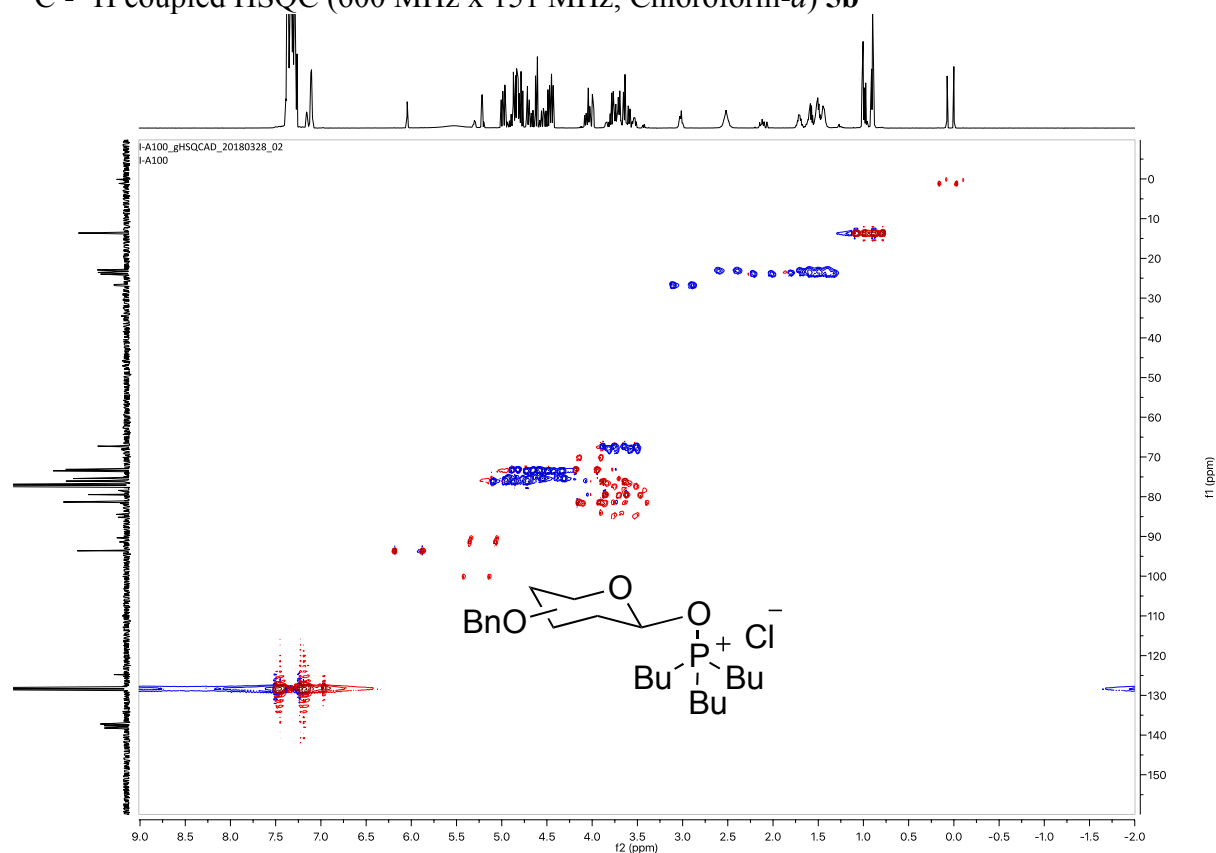

COSY (600 MHz, Chloroform-*d*) **5b**

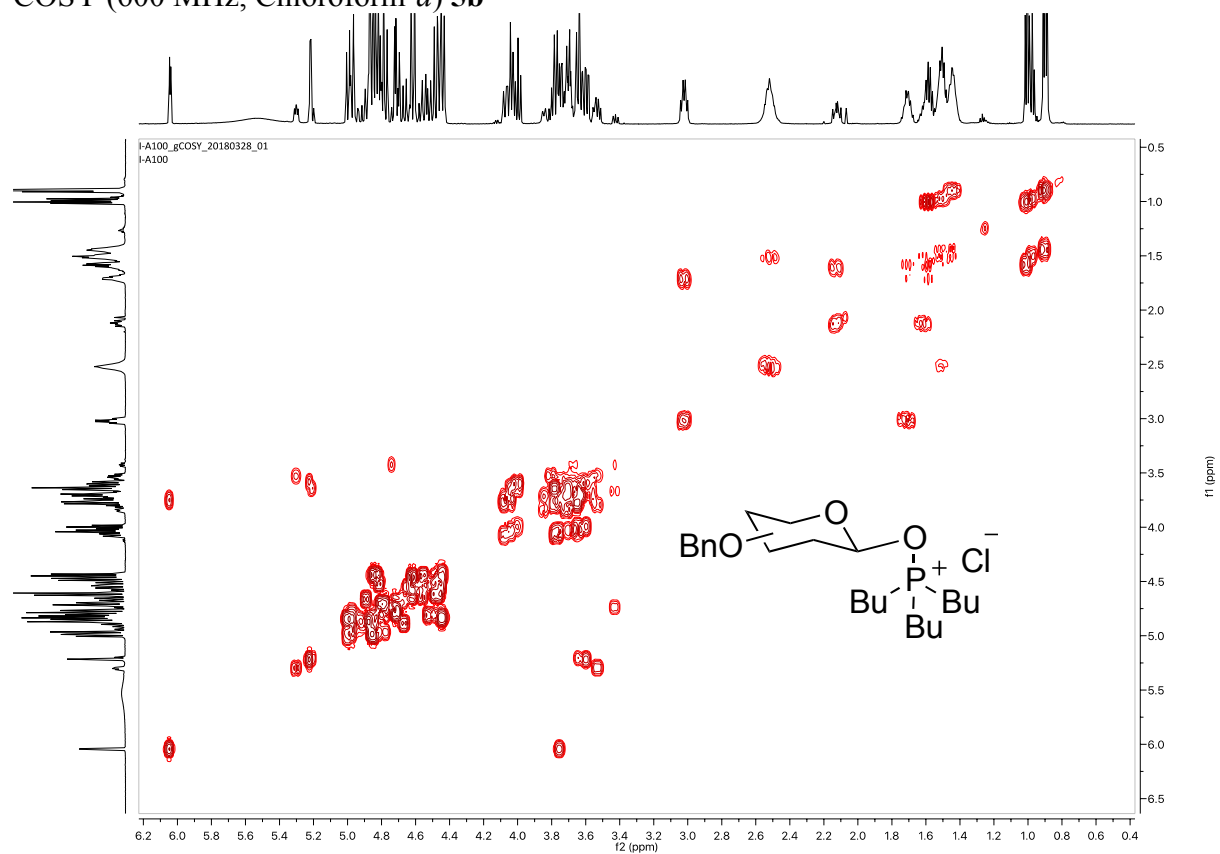

Supplement: c9ob01544b1.pdf [file c9ob01544b1.pdf]
